# Supplementary material for: Transcriptomic and Systematic Analyses Reveal TabZIP Family Members Involved in the Response to Different Concentrations of Auxin in Wheat Root
Source: Research Square preprint supplement (doi:10.21203/rs.3.rs-114349/v1), 2020-12-01
Supplement: Supplementary file 1 [file 223baf6170571af9647b9197.xlsx]

## Sheet: Table S1
Table S1. Differentially expressed genes response to 1uM auxin in root libraries.
gene_id	length	CS-Root-0uM-1.rawreads	CS-Root-0uM-1.FPKM	CS-Root-0uM-2.rawreads	CS-Root-0uM-2.FPKM	CS-Root-0uM-3.rawreads	CS-Root-0uM-3.FPKM	CS-Root-1uM-1.rawreads	CS-Root-1uM-1.FPKM	CS-Root-1uM-2.rawreads	CS-Root-1uM-2.FPKM	CS-Root-1uM-3.rawreads	CS-Root-1uM-3.FPKM	baseMean	log2FoldChange	lfcSE	stat	pvalue	padj	Regulation	GeneSymbol	KO	GO
TRIAE_CS42_5BL_TGACv1_407430_AA1356810	1123	76	3.39	129	5.04	104	4.47	804	35.53	515	22.11	594	26.26	374.1	2.41484	0.160023	15.0906	1.87e-51	1.2e-46	Ups	gi|475592055|gb|EMT21965.1| hypothetical protein F775_26893 [Aegilops tauschii]	_	_
TRIAE_CS42_2BS_TGACv1_148847_AA0495340	2644	85	1.34	110	1.52	123	1.86	630	9.81	574	8.69	443	6.9	330.308	2.20997	0.15091	14.6443	1.47e-48	4.7e-44	Ups	gi|745626818|gb|AJD09164.1| putative transcription factor bHLH [Triticum aestivum]	_	_
TRIAE_CS42_3B_TGACv1_221922_AA0753240	4595	1272	5.5	1643	6.23	1739	7.24	526	2.25	443	1.84	519	2.22	1002.78	-1.49205	0.113638	-13.1298	2.22e-39	4.75e-35	Down	gi|669030022|emb|CDM84413.1| unnamed protein product [Triticum aestivum]	_	_
TRIAE_CS42_4BL_TGACv1_321855_AA1066310	1573	210	5.51	342	7.87	310	7.84	24	0.62	32	0.81	44	1.15	155.187	-2.50666	0.191599	-13.0829	4.13e-39	6.62e-35	Down	gi|326491697|dbj|BAJ94326.1| predicted protein [Hordeum vulgare subsp. vulgare]	_	_
TRIAE_CS42_4DL_TGACv1_342695_AA1119870	1615	268	6.85	558	12.5	393	9.68	53	1.34	29	0.71	57	1.44	217.719	-2.50886	0.193609	-12.9584	2.11e-38	2.7e-34	Down	gi|475579848|gb|EMT18445.1| hypothetical protein F775_30356 [Aegilops tauschii]	_	_
TRIAE_CS42_3DL_TGACv1_249381_AA0847170	4957	151	1.86	213	2.3	189	2.24	534	6.52	548	6.51	562	6.87	367.486	1.54592	0.123518	12.5157	6.12e-36	6.55e-32	Ups	gi|475559497|gb|EMT13355.1| Subtilisin-like protease [Aegilops tauschii]	_	_
TRIAE_CS42_6DL_TGACv1_527316_AA1702110	1919	5	0.13	3	0.07	6	0.15	137	3.61	90	2.31	152	4.01	66.6689	2.96125	0.239756	12.3511	4.81e-35	4.41e-31	Ups	gi|475626018|gb|EMT33165.1| Dihydroflavonol-4-reductase [Aegilops tauschii]	K09753	biological_process:cellular metabolic process(GO:0044237);molecular_function:nucleotide binding(GO:0000166);molecular_function:coenzyme binding(GO:0050662);molecular_function:catalytic activity(GO:0003824)
TRIAE_CS42_4AS_TGACv1_307137_AA1017480	1915	223	4.81	465	8.79	388	8.06	37	0.79	61	1.27	30	0.64	193.345	-2.42757	0.198948	-12.202	3.03e-34	2.43e-30	Down		_	_
TRIAE_CS42_3AL_TGACv1_193889_AA0621910	1839	101	2.39	111	2.31	79	1.8	638	14.99	373	8.52	428	10.06	291.143	2.07965	0.170656	12.1862	3.68e-34	2.63e-30	Ups	gi|669030501|emb|CDM85047.1| unnamed protein product [Triticum aestivum]	_	cellular_component:cytoplasmic membrane-bounded vesicle(GO:0016023)
TRIAE_CS42_4DS_TGACv1_361237_AA1164150	671	425	31.89	568	37.38	402	29.07	1219	90.69	1084	78.37	1098	81.73	800.427	1.30163	0.107246	12.1368	6.74e-34	4.33e-30	Ups	gi|475572644|gb|EMT16551.1| hypothetical protein F775_32330 [Aegilops tauschii]	_	_
TRIAE_CS42_4BS_TGACv1_330164_AA1106330	551	216	20.59	222	18.56	169	15.52	557	52.63	575	52.8	598	56.54	391.184	1.48493	0.123604	12.0136	3.02e-33	1.76e-29	Ups	gi|475572644|gb|EMT16551.1| hypothetical protein F775_32330 [Aegilops tauschii]	_	_
TRIAE_CS42_7AL_TGACv1_556459_AA1763560	1835	85	2.29	127	3.01	103	2.68	397	10.62	366	9.52	354	9.48	239.842	1.73705	0.144934	11.9851	4.25e-33	2.28e-29	Ups	gi|473907662|gb|EMS49450.1| putative WRKY transcription factor 70 [Triticum urartu]	_	_
TRIAE_CS42_1DL_TGACv1_064773_AA0235660	3202	540	5.41	591	5.19	570	5.5	141	1.4	187	1.8	190	1.89	362.519	-1.53644	0.128716	-11.9366	7.63e-33	3.77e-29	Down	gi|326511351|dbj|BAJ87689.1| predicted protein [Hordeum vulgare subsp. vulgare]	K15402	molecular_function:heme binding(GO:0020037);molecular_function:oxidoreductase activity, acting on paired donors, with incorporation or reduction of molecular oxygen(GO:0016705);molecular_function:monooxygenase activity(GO:0004497);molecular_function:iron ion binding(GO:0005506);molecular_function:electron carrier activity(GO:0009055);biological_process:oxidation-reduction process(GO:0055114)
TRIAE_CS42_2DS_TGACv1_179032_AA0603750	1559	709	22.73	1003	28.21	909	28.09	301	9.57	327	10.1	291	9.26	576.929	-1.36202	0.114595	-11.8855	1.41e-32	6.46e-29	Down	gi|326500870|dbj|BAJ95101.1| predicted protein [Hordeum vulgare subsp. vulgare]	K00430	molecular_function:heme binding(GO:0020037);molecular_function:metal ion binding(GO:0046872);molecular_function:peroxidase activity(GO:0004601);biological_process:oxidation-reduction process(GO:0055114);biological_process:response to oxidative stress(GO:0006979)
TRIAE_CS42_1DS_TGACv1_082660_AA0264860	1872	431	7.62	413	6.41	436	7.43	928	16.28	1156	19.7	1032	18.11	735.067	1.28588	0.108727	11.8266	2.84e-32	1.22e-28	Ups	gi|326506728|dbj|BAJ91405.1| predicted protein [Hordeum vulgare subsp. vulgare]	_	_
TRIAE_CS42_3AL_TGACv1_194775_AA0639220	4569	1300	9.22	1881	11.7	1866	12.75	641	4.51	577	3.94	593	4.17	1118.73	-1.33157	0.113531	-11.7287	9.09e-32	3.65e-28	Down	gi|475523203|gb|EMT06845.1| hypothetical protein F775_12157 [Aegilops tauschii]	_	_
TRIAE_CS42_3DL_TGACv1_249702_AA0854780	4711	998	3.69	1594	5.16	1469	5.23	367	1.34	373	1.33	488	1.79	859.83	-1.52923	0.132529	-11.5388	8.4e-31	3.17e-27	Down	gi|475523203|gb|EMT06845.1| hypothetical protein F775_12157 [Aegilops tauschii]	_	_
TRIAE_CS42_4DS_TGACv1_361511_AA1169370	4309	627	16.54	537	12.43	764	19.43	2032	53.16	1612	40.98	1850	48.43	1245.67	1.46707	0.128771	11.3928	4.54e-30	1.62e-26	Ups	gi|475617133|gb|EMT30011.1| Formate dehydrogenase, mitochondrial [Aegilops tauschii]	K00122	molecular_function:NAD binding(GO:0051287);cellular_component:mitochondrion(GO:0005739);biological_process:oxidation-reduction process(GO:0055114);molecular_function:oxidoreductase activity, acting on the CH-OH group of donors, NAD or NADP as acceptor(GO:0016616);molecular_function:formate dehydrogenase (NAD+) activity(GO:0008863)
TRIAE_CS42_3DL_TGACv1_249043_AA0835800	1479	309	7.15	358	7.26	307	6.84	71	1.63	96	2.14	62	1.42	195.743	-1.80183	0.158862	-11.3421	8.12e-30	2.74e-26	Down	gi|326498195|dbj|BAJ98525.1| predicted protein [Hordeum vulgare subsp. vulgare]	_	molecular_function:catalytic activity(GO:0003824);biological_process:metabolic process(GO:0008152)
TRIAE_CS42_U_TGACv1_642331_AA2115880	3028	579	4.97	702	5.28	626	5.17	1348	11.46	1229	10.16	1223	10.41	951.406	1.03188	0.0927114	11.13	8.97e-29	2.74e-25	Ups	gi|669030600|emb|CDM85179.1| unnamed protein product [Triticum aestivum]	K14638	biological_process:transport(GO:0006810);cellular_component:membrane(GO:0016020);molecular_function:transporter activity(GO:0005215)
TRIAE_CS42_7BL_TGACv1_579301_AA1906230	1699	0	0	0	0	1	0.03	60	1.65	72	1.93	95	2.62	38.6555	2.81294	0.254483	11.0535	2.11e-28	6.15e-25	Ups	gi|194352764|emb|CAQ00110.1| papain-like cysteine proteinase [Hordeum vulgare subsp. vulgare]	_	molecular_function:cysteine-type peptidase activity(GO:0008234);biological_process:proteolysis(GO:0006508)
TRIAE_CS42_6BL_TGACv1_503059_AA1627150	1746	2	0.06	5	0.13	3	0.09	116	3.42	62	1.78	194	5.72	64.8785	2.76378	0.251251	11.0001	3.82e-28	1.07e-24	Ups	gi|475564824|gb|EMT14622.1| Bifunctional dihydroflavonol 4-reductase/flavanone 4-reductase [Aegilops tauschii]	K09753	biological_process:cellular metabolic process(GO:0044237);molecular_function:nucleotide binding(GO:0000166);molecular_function:coenzyme binding(GO:0050662);molecular_function:catalytic activity(GO:0003824)
TRIAE_CS42_2DS_TGACv1_178424_AA0595370	5142	95	1.43	91	1.2	101	1.46	306	4.56	348	5.04	307	4.58	209.286	1.64169	0.14933	10.9937	4.1e-28	1.1e-24	Ups	gi|475333573|gb|EMT00327.1| hypothetical protein F775_32417 [Aegilops tauschii]	_	_
TRIAE_CS42_6DL_TGACv1_526393_AA1682130	7751	968	6.42	1081	6.29	868	5.55	2075	13.64	1911	12.21	1786	11.75	1448.5	1.02091	0.0932519	10.9479	6.8e-28	1.75e-24	Ups	gi|475593837|gb|EMT22507.1| Putative disease resistance protein RGA4 [Aegilops tauschii]	_	_
TRIAE_CS42_5BL_TGACv1_407430_AA1356820	6770	338	9.59	574	14.28	564	15.42	1584	44.54	1216	33.23	1423	40.04	953.2	1.47691	0.135736	10.8807	1.42e-27	3.52e-24	Ups	gi|960476017|ref|XP_014755959.1| PREDICTED: uncharacterized protein LOC104584065 [Brachypodium distachyon]	_	_
TRIAE_CS42_4AL_TGACv1_290470_AA0985740	843	683	37.93	986	48.03	739	39.55	1778	97.91	1573	84.18	1755	96.7	1251.93	1.11566	0.102925	10.8395	2.24e-27	5.32e-24	Ups	gi|474059475|gb|EMS53925.1| hypothetical protein TRIUR3_16809 [Triticum urartu]	_	_
TRIAE_CS42_1DL_TGACv1_061195_AA0188480	7711	266	3.28	258	2.79	233	2.77	619	7.56	689	8.18	561	6.85	438.98	1.2924	0.119959	10.7737	4.58e-27	1.05e-23	Ups	gi|475607287|gb|EMT26659.1| hypothetical protein F775_52502 [Aegilops tauschii]	_	cellular_component:membrane(GO:0016020);molecular_function:oxidoreductase activity(GO:0016491)
TRIAE_CS42_3DL_TGACv1_252282_AA0889100	4551	592	6.99	918	9.5	528	6	180	2.11	177	2.01	218	2.55	422.944	-1.58421	0.147296	-10.7553	5.6e-27	1.24e-23	Down	gi|670021174|emb|CDJ26292.1| unnamed protein product [Triticum aestivum]	K17471	cellular_component:integral component of membrane(GO:0016021);molecular_function:secondary active sulfate transmembrane transporter activity(GO:0008271);biological_process:sulfate transport(GO:0008272);biological_process:transmembrane transport(GO:0055085)
TRIAE_CS42_3B_TGACv1_227188_AA0822050	3924	265	7.54	302	7.54	315	8.64	820	23.14	870	23.86	612	17.28	532.191	1.35677	0.127895	10.6085	2.72e-26	5.82e-23	Ups	gi|113734244|dbj|BAF30424.1| basic helix-loop-helix protein [Hordeum vulgare subsp. vulgare]	_	molecular_function:protein dimerization activity(GO:0046983);molecular_function:DNA binding(GO:0003677)
TRIAE_CS42_3AL_TGACv1_196226_AA0658520	3679	269	2.27	278	2.05	370	3	921	7.69	844	6.85	722	6.03	570.111	1.39836	0.13199	10.5944	3.16e-26	6.55e-23	Ups	gi|113734244|dbj|BAF30424.1| basic helix-loop-helix protein [Hordeum vulgare subsp. vulgare]	_	molecular_function:protein dimerization activity(GO:0046983);molecular_function:DNA binding(GO:0003677)
TRIAE_CS42_6BS_TGACv1_513127_AA1631010	10419	324	3.8	344	3.54	240	2.72	706	8.22	724	8.19	842	9.81	531.564	1.30854	0.124909	10.4759	1.11e-25	2.24e-22	Ups	gi|57834063|emb|CAD40309.2| OSJNBb0013O03.4 [Oryza sativa Japonica Group]	_	cellular_component:cytoplasmic membrane-bounded vesicle(GO:0016023)
TRIAE_CS42_2DL_TGACv1_157956_AA0503340	9876	1448	10.32	1855	11.6	1925	13.22	805	5.69	717	4.92	749	5.3	1227.9	-1.0826	0.104093	-10.4003	2.47e-25	4.81e-22	Down	gi|475563758|gb|EMT14360.1| Putative copper-transporting ATPase 3 [Aegilops tauschii]	K17686	biological_process:copper ion transport(GO:0006825);molecular_function:copper ion binding(GO:0005507);molecular_function:ATP binding(GO:0005524);cellular_component:integral component of membrane(GO:0016021);molecular_function:copper-transporting ATPase activity(GO:0043682)
TRIAE_CS42_7DL_TGACv1_602597_AA1962010	1779	60	1.73	106	2.68	76	2.11	286	8.16	273	7.57	290	8.28	182.569	1.6796	0.161958	10.3706	3.38e-25	6.37e-22	Ups	gi|189172033|gb|ACD80372.1| WRKY11 transcription factor, partial [Triticum aestivum]	_	_
TRIAE_CS42_1BL_TGACv1_033050_AA0136450	772	146	7.8	267	12.52	135	6.95	21	1.11	19	0.98	27	1.43	98.4736	-2.2376	0.216236	-10.348	4.27e-25	7.84e-22	Down	gi|326491863|dbj|BAJ98156.1| predicted protein [Hordeum vulgare subsp. vulgare]<>gi|326508412|dbj|BAJ99473.1| predicted protein [Hordeum vulgare subsp. vulgare]	_	_
TRIAE_CS42_2BL_TGACv1_132980_AA0440730	1078	507	19.41	528	17.73	585	21.58	188	7.14	214	7.89	197	7.48	363.707	-1.28222	0.125692	-10.2013	1.96e-24	3.4e-21	Down	gi|326511371|dbj|BAJ87699.1| predicted protein [Hordeum vulgare subsp. vulgare]	_	_
TRIAE_CS42_4BL_TGACv1_320555_AA1043120	2642	281	7.45	379	8.81	290	7.41	75	1.97	57	1.46	101	2.66	192.115	-1.7053	0.16991	-10.0365	1.05e-23	1.78e-20	Down	gi|326507956|dbj|BAJ86721.1| predicted protein [Hordeum vulgare subsp. vulgare]	K00799	_
TRIAE_CS42_5BL_TGACv1_406098_AA1340730	8553	277	1.85	415	2.43	388	2.5	803	5.31	841	5.41	765	5.07	581.598	1.16668	0.11633	10.0291	1.14e-23	1.87e-20	Ups	gi|94410818|gb|ABF18542.1| serine/threonine kinase-like protein ABC1036 [Hordeum vulgare subsp. vulgare]	K01102	biological_process:protein phosphorylation(GO:0006468);molecular_function:ATP binding(GO:0005524);molecular_function:protein serine/threonine kinase activity(GO:0004674)
TRIAE_CS42_2BL_TGACv1_131468_AA0428200	3689	194	4.04	260	4.74	231	4.63	31	0.64	45	0.9	62	1.28	133.57	-1.87826	0.18767	-10.0083	1.4e-23	2.25e-20	Down	gi|475554971|gb|EMT12341.1| Putative metal-nicotianamine transporter YSL6 [Aegilops tauschii]	_	biological_process:transmembrane transport(GO:0055085)
TRIAE_CS42_3AL_TGACv1_193996_AA0624190	1514	93	2.68	129	3.26	99	2.75	322	9.21	356	9.89	282	8.07	214.071	1.49984	0.150162	9.98812	1.72e-23	2.69e-20	Ups	gi|475589782|gb|EMT21273.1| Peroxidase 2 [Aegilops tauschii]	K00430	molecular_function:heme binding(GO:0020037);molecular_function:metal ion binding(GO:0046872);molecular_function:peroxidase activity(GO:0004601);biological_process:oxidation-reduction process(GO:0055114);biological_process:response to oxidative stress(GO:0006979)
TRIAE_CS42_7DL_TGACv1_604837_AA2002130	1082	7	0.29	22	0.8	15	0.6	168	6.92	102	4.08	120	4.95	73.1592	2.2896	0.229501	9.97641	1.93e-23	2.95e-20	Ups	gi|326492425|dbj|BAK01996.1| predicted protein [Hordeum vulgare subsp. vulgare]	_	_
TRIAE_CS42_3AL_TGACv1_194893_AA0641610	1625	80	2.38	112	2.92	123	3.52	388	11.42	327	9.35	300	8.84	222.797	1.57518	0.15804	9.967	2.13e-23	3.17e-20	Ups	gi|292659260|gb|ADE34585.1| NAC transcription factor 4 [Triticum aestivum]	_	molecular_function:DNA binding(GO:0003677);biological_process:regulation of transcription, DNA-templated(GO:0006355)
TRIAE_CS42_3AL_TGACv1_195143_AA0645280	3806	366	5.09	387	4.72	408	5.46	99	1.36	149	1.99	110	1.52	248.37	-1.47977	0.149535	-9.89586	4.34e-23	6.33e-20	Down	gi|326498195|dbj|BAJ98525.1| predicted protein [Hordeum vulgare subsp. vulgare]	_	molecular_function:catalytic activity(GO:0003824);biological_process:metabolic process(GO:0008152)
TRIAE_CS42_2DS_TGACv1_178613_AA0598190	2753	60	0.62	105	0.95	114	1.13	366	3.74	301	2.99	314	3.21	211.148	1.66065	0.168046	9.88213	4.98e-23	7.1e-20	Ups	gi|475571657|gb|EMT16314.1| Transcription factor bHLH47 [Aegilops tauschii]<>gi|745626816|gb|AJD09163.1| putative transcription factor bHLH [Triticum aestivum]	_	molecular_function:protein dimerization activity(GO:0046983)
TRIAE_CS42_3B_TGACv1_227841_AA0824870	1543	677	11.47	711	10.57	785	12.82	168	2.82	292	4.77	254	4.27	472.513	-1.41073	0.143418	-9.8365	7.84e-23	1.08e-19	Down	gi|326498195|dbj|BAJ98525.1| predicted protein [Hordeum vulgare subsp. vulgare]	_	molecular_function:catalytic activity(GO:0003824);biological_process:metabolic process(GO:0008152)
TRIAE_CS42_1AL_TGACv1_001888_AA0036300	1790	587	8.34	567	7.06	546	7.47	203	2.86	205	2.81	245	3.45	385.962	-1.23081	0.125136	-9.83576	7.9e-23	1.08e-19	Down	gi|242052385|ref|XP_002455338.1| hypothetical protein SORBIDRAFT_03g008760 [Sorghum bicolor]<>gi|241927313|gb|EES00458.1| hypothetical protein SORBI_003G104600 [Sorghum bicolor]	_	biological_process:response to cadmium ion(GO:0046686);molecular_function:nucleotide binding(GO:0000166);cellular_component:plasma membrane(GO:0005886);biological_process:response to oxidative stress(GO:0006979);cellular_component:cytoplasm(GO:0005737);molecular_function:oxidoreductase activity(GO:0016491);biological_process:oxidation-reduction process(GO:0055114)
TRIAE_CS42_7AS_TGACv1_570553_AA1837550	849	54	3.47	82	4.62	106	6.57	380	24.22	249	15.42	407	25.95	214.971	1.83249	0.186599	9.82043	9.2e-23	1.23e-19	Ups	gi|475623497|gb|EMT32242.1| hypothetical protein F775_18516 [Aegilops tauschii]	_	_
TRIAE_CS42_1BL_TGACv1_030541_AA0093530	2089	178	3.87	299	5.71	303	6.36	57	1.23	31	0.65	56	1.21	149.67	-1.93191	0.196838	-9.81472	9.73e-23	1.27e-19	Down	gi|357131906|ref|XP_003567574.1| PREDICTED: polygalacturonase At1g48100 [Brachypodium distachyon]<>gi|944068575|gb|KQK04059.1| hypothetical protein BRADI_2g11380 [Brachypodium distachyon]	K01213	cellular_component:extracellular region(GO:0005576);molecular_function:polygalacturonase activity(GO:0004650);biological_process:carbohydrate metabolic process(GO:0005975)
TRIAE_CS42_1BL_TGACv1_032973_AA0135890	1026	70	3.11	147	5.73	111	4.76	4	0.18	12	0.51	8	0.35	56.3208	-2.34708	0.241543	-9.71702	2.55e-22	3.28e-19	Down	gi|474431953|gb|EMS68027.1| hypothetical protein TRIUR3_23641 [Triticum urartu]	_	_
TRIAE_CS42_3AL_TGACv1_194627_AA0636990	2775	244	3.44	351	4.35	321	4.37	779	10.9	734	9.98	608	8.52	506.53	1.20684	0.124283	9.7104	2.72e-22	3.43e-19	Ups	gi|669030600|emb|CDM85179.1| unnamed protein product [Triticum aestivum]	K14638	biological_process:transport(GO:0006810);cellular_component:membrane(GO:0016020);molecular_function:transporter activity(GO:0005215)
TRIAE_CS42_1AL_TGACv1_000054_AA0001480	915	598	26.97	784	31.01	603	26.21	1392	62.25	1494	64.92	1140	51.01	1000.61	1.04515	0.107819	9.69357	3.21e-22	3.96e-19	Ups	gi|475625370|gb|EMT32950.1| hypothetical protein F775_09863 [Aegilops tauschii]	_	_
TRIAE_CS42_3B_TGACv1_220873_AA0722030	4279	656	9.86	769	10.14	754	10.92	325	4.84	344	4.98	289	4.31	513.884	-1.06234	0.10997	-9.66031	4.45e-22	5.38e-19	Down	gi|992321534|gb|AMH86041.1| fatty acyl-coenzyme A reductase [Aegilops tauschii]	K13356	molecular_function:fatty-acyl-CoA reductase (alcohol-forming) activity(GO:0080019);molecular_function:nucleotide binding(GO:0000166)
TRIAE_CS42_1BL_TGACv1_030671_AA0097460	3070	277	2.19	369	2.56	278	2.12	63	0.49	108	0.82	61	0.48	187.58	-1.66821	0.173416	-9.61972	6.6e-22	7.85e-19	Down	gi|326511351|dbj|BAJ87689.1| predicted protein [Hordeum vulgare subsp. vulgare]	K15402	molecular_function:heme binding(GO:0020037);molecular_function:oxidoreductase activity, acting on paired donors, with incorporation or reduction of molecular oxygen(GO:0016705);molecular_function:monooxygenase activity(GO:0004497);molecular_function:iron ion binding(GO:0005506);molecular_function:electron carrier activity(GO:0009055);biological_process:oxidation-reduction process(GO:0055114)
TRIAE_CS42_U_TGACv1_641787_AA2104260	895	477	21.99	604	24.42	549	24.39	171	7.82	238	10.57	211	9.65	367.445	-1.2341	0.128771	-9.5837	9.36e-22	1.09e-18	Down	gi|474198927|gb|EMS58436.1| hypothetical protein TRIUR3_29795 [Triticum urartu]	_	cellular_component:nucleus(GO:0005634)
TRIAE_CS42_1DL_TGACv1_064639_AA0235210	2045	356	6.22	483	7.4	415	6.98	132	2.29	146	2.46	165	2.86	276.666	-1.31574	0.137546	-9.56583	1.11e-21	1.28e-18	Down	gi|475489504|gb|EMT03433.1| hypothetical protein F775_00847 [Aegilops tauschii]	_	biological_process:regulation of sulfur utilization(GO:0006792);biological_process:cellular response to sulfur starvation(GO:0010438)
TRIAE_CS42_1BL_TGACv1_031415_AA0113550	1034	151	6.58	299	11.43	307	12.89	41	1.77	57	2.39	31	1.34	143.064	-1.9703	0.206014	-9.56391	1.13e-21	1.28e-18	Down	gi|326490886|dbj|BAJ90110.1| predicted protein [Hordeum vulgare subsp. vulgare]<>gi|326509401|dbj|BAJ91617.1| predicted protein [Hordeum vulgare subsp. vulgare]<>gi|326511553|dbj|BAJ91921.1| predicted protein [Hordeum vulgare subsp. vulgare]	_	_
TRIAE_CS42_6AL_TGACv1_471142_AA1503320	1957	11	0.28	25	0.55	10	0.24	119	2.95	96	2.31	135	3.35	66.6606	2.15849	0.228084	9.46358	2.98e-21	3.29e-18	Ups	gi|474259163|gb|EMS60461.1| hypothetical protein TRIUR3_04527 [Triticum urartu]	_	_
TRIAE_CS42_3AL_TGACv1_194141_AA0627340	1185	16	0.61	30	1.01	28	1.03	158	6.01	112	4.14	151	5.75	83.304	2.00233	0.212756	9.41139	4.9e-21	5.33e-18	Ups	gi|474149865|gb|EMS56874.1| Abscisic stress-ripening protein 1 [Triticum urartu]	_	_
TRIAE_CS42_4DS_TGACv1_361342_AA1166000	1801	88	2.02	126	2.53	128	2.83	311	7.07	319	7.04	316	7.18	215.339	1.39965	0.148799	9.40627	5.14e-21	5.5e-18	Ups	gi|475619151|gb|EMT30672.1| Aspartic proteinase nepenthesin-2 [Aegilops tauschii]	_	cellular_component:cytoplasmic membrane-bounded vesicle(GO:0016023)
TRIAE_CS42_4AS_TGACv1_306835_AA1013950	15229	177	1.34	321	2.14	233	1.71	634	4.77	682	4.99	538	4.05	430.647	1.31134	0.13957	9.39553	5.69e-21	5.99e-18	Ups	gi|473904105|gb|EMS49259.1| Peroxidasin-like protein [Triticum urartu]	K10529	molecular_function:heme binding(GO:0020037);molecular_function:peroxidase activity(GO:0004601);molecular_function:oxidoreductase activity, acting on single donors with incorporation of molecular oxygen, incorporation of two atoms of oxygen(GO:0016702);biological_process:oxidation-reduction process(GO:0055114);biological_process:response to oxidative stress(GO:0006979)
TRIAE_CS42_4AL_TGACv1_288351_AA0945880	5339	308	4.16	438	5.19	387	5.04	1244	16.66	1123	14.61	708	9.49	702.724	1.38057	0.147017	9.39058	5.97e-21	6.18e-18	Ups	gi|357149192|ref|XP_003575031.1| PREDICTED: glycerophosphodiester phosphodiesterase GDPD1, chloroplastic-like [Brachypodium distachyon]<>gi|944064028|gb|KQJ99618.1| hypothetical protein BRADI_3g44290 [Brachypodium distachyon]	K18696	biological_process:glycerol metabolic process(GO:0006071);molecular_function:glycerophosphodiester phosphodiesterase activity(GO:0008889);biological_process:lipid metabolic process(GO:0006629)
TRIAE_CS42_3B_TGACv1_222945_AA0773750	3331	574	3.44	827	4.35	807	4.67	1714	10.2	1532	8.86	1360	8.09	1135.64	1.07665	0.11482	9.37687	6.8e-21	6.93e-18	Ups	gi|19571117|dbj|BAB86541.1| OSJNBb0008G24.11 [Oryza sativa Japonica Group]	K14638	biological_process:transport(GO:0006810);cellular_component:membrane(GO:0016020);molecular_function:transporter activity(GO:0005215);cellular_component:mitochondrion(GO:0005739)
TRIAE_CS42_1AS_TGACv1_020684_AA0079270	4426	724	11	975	12.99	1036	15.16	349	5.26	420	6.15	343	5.17	628.977	-1.15265	0.123172	-9.35803	8.12e-21	8.15e-18	Down	gi|326529467|dbj|BAK04680.1| predicted protein [Hordeum vulgare subsp. vulgare]	_	biological_process:lipid metabolic process(GO:0006629);molecular_function:triglyceride lipase activity(GO:0004806)
TRIAE_CS42_1AL_TGACv1_000208_AA0006160	1069	272	10.5	356	12.05	331	12.31	75	2.87	104	3.87	112	4.29	203.675	-1.47461	0.157695	-9.35098	8.68e-21	8.58e-18	Down	gi|326489408|dbj|BAJ98118.1| predicted protein [Hordeum vulgare subsp. vulgare]<>gi|326512196|dbj|BAJ96079.1| predicted protein [Hordeum vulgare subsp. vulgare]	_	_
TRIAE_CS42_2AS_TGACv1_113493_AA0356930	2689	398	8.44	464	8.63	441	9.02	102	2.15	182	3.72	106	2.23	276.118	-1.49238	0.159692	-9.34538	9.16e-21	8.91e-18	Down	gi|475616820|gb|EMT29891.1| Taxadien-5-alpha-ol O-acetyltransferase [Aegilops tauschii]	K15400	molecular_function:transferase activity, transferring acyl groups other than amino-acyl groups(GO:0016747)
TRIAE_CS42_4BS_TGACv1_330248_AA1106770	2401	1130	19.42	1472	22.19	1594	26.4	554	9.44	461	7.63	648	11.05	958.835	-1.18077	0.126662	-9.32218	1.14e-20	1.09e-17	Down	gi|326506040|dbj|BAJ91259.1| predicted protein [Hordeum vulgare subsp. vulgare]	_	_
TRIAE_CS42_4DS_TGACv1_361706_AA1171810	1614	104	2.87	114	2.76	95	2.53	11	0.3	16	0.43	11	0.3	56.9232	-2.12147	0.22791	-9.30837	1.3e-20	1.23e-17	Down	gi|475435434|gb|EMT01311.1| Gibberellin 20 oxidase 1 [Aegilops tauschii]	_	biological_process:oxidation-reduction process(GO:0055114);molecular_function:iron ion binding(GO:0005506);molecular_function:oxidoreductase activity, acting on paired donors, with incorporation or reduction of molecular oxygen, 2-oxoglutarate as one donor, and incorporation of one atom each of oxygen into both donors(GO:0016706)
TRIAE_CS42_3AL_TGACv1_196516_AA0661030	838	1140	62.39	1049	50.35	1047	55.22	1930	104.73	2016	106.31	2448	132.92	1608.68	1.00029	0.107728	9.28528	1.61e-20	1.5e-17	Ups	gi|669031354|emb|CDM86287.1| unnamed protein product [Triticum aestivum]	_	_
TRIAE_CS42_2DL_TGACv1_157936_AA0502570	6907	1002	28.09	1626	39.98	1330	35.93	2694	74.88	2488	67.21	2594	72.15	1952.19	1.00633	0.108715	9.25654	2.11e-20	1.94e-17	Ups	gi|474176774|gb|EMS57783.1| Naringenin,2-oxoglutarate 3-dioxygenase [Triticum urartu]	_	biological_process:oxidation-reduction process(GO:0055114);molecular_function:oxidoreductase activity, acting on paired donors, with incorporation or reduction of molecular oxygen, 2-oxoglutarate as one donor, and incorporation of one atom each of oxygen into both donors(GO:0016706)
TRIAE_CS42_4AL_TGACv1_288725_AA0956480	2033	101	2.99	59	1.53	96	2.73	266	7.8	310	8.83	342	10.03	197.524	1.63658	0.177153	9.23824	2.51e-20	2.27e-17	Ups	gi|475609733|gb|EMT27484.1| Protein SRG1 [Aegilops tauschii]	_	biological_process:oxidation-reduction process(GO:0055114);molecular_function:oxidoreductase activity, acting on paired donors, with incorporation or reduction of molecular oxygen, 2-oxoglutarate as one donor, and incorporation of one atom each of oxygen into both donors(GO:0016706)
TRIAE_CS42_1AL_TGACv1_000246_AA0007210	2331	266	5.15	421	7.15	388	7.24	106	2.04	67	1.25	113	2.17	221.081	-1.59357	0.172605	-9.23247	2.64e-20	2.36e-17	Down	gi|357131906|ref|XP_003567574.1| PREDICTED: polygalacturonase At1g48100 [Brachypodium distachyon]<>gi|944068575|gb|KQK04059.1| hypothetical protein BRADI_2g11380 [Brachypodium distachyon]	K01213	cellular_component:extracellular region(GO:0005576);molecular_function:polygalacturonase activity(GO:0004650);biological_process:carbohydrate metabolic process(GO:0005975)
TRIAE_CS42_4DS_TGACv1_361015_AA1158760	4310	1060	15.73	1332	17.33	1334	19.08	3426	50.41	2341	33.47	2443	35.97	1993.48	1.13917	0.123648	9.21302	3.17e-20	2.79e-17	Ups	gi|357116823|ref|XP_003560176.1| PREDICTED: endoplasmic reticulum oxidoreductin-1-like [Brachypodium distachyon]<>gi|944078015|gb|KQK13367.1| hypothetical protein BRADI_1g09680 [Brachypodium distachyon]	K10950	cellular_component:endoplasmic reticulum membrane(GO:0005789);molecular_function:flavin adenine dinucleotide binding(GO:0050660);biological_process:protein folding(GO:0006457);molecular_function:oxidoreductase activity, acting on a sulfur group of donors, disulfide as acceptor(GO:0016671);molecular_function:protein disulfide isomerase activity(GO:0003756);biological_process:oxidation-reduction pr…
TRIAE_CS42_6BL_TGACv1_499432_AA1582480	2685	201	5.58	235	5.72	210	5.62	61	1.68	59	1.58	60	1.65	134.668	-1.55353	0.168775	-9.20476	3.42e-20	2.97e-17	Down	gi|326526627|dbj|BAK00702.1| predicted protein [Hordeum vulgare subsp. vulgare]	_	_
TRIAE_CS42_1DL_TGACv1_063465_AA0227570	1115	224	8.29	390	12.66	286	10.2	80	2.94	79	2.82	91	3.34	186.182	-1.54918	0.168426	-9.19801	3.65e-20	3.12e-17	Down	gi|326489408|dbj|BAJ98118.1| predicted protein [Hordeum vulgare subsp. vulgare]<>gi|326512196|dbj|BAJ96079.1| predicted protein [Hordeum vulgare subsp. vulgare]	_	_
TRIAE_CS42_4DL_TGACv1_346216_AA1155370	3179	2788	38.21	3285	39.49	3303	43.62	8250	112.11	5249	69.32	7001	95.19	4993.44	1.12901	0.123021	9.17741	4.42e-20	3.68e-17	Ups	gi|326494618|dbj|BAJ94428.1| predicted protein [Hordeum vulgare subsp. vulgare]<>gi|326528981|dbj|BAJ97512.1| predicted protein [Hordeum vulgare subsp. vulgare]	K01568	biological_process:metabolic process(GO:0008152);molecular_function:catalytic activity(GO:0003824);molecular_function:magnesium ion binding(GO:0000287);molecular_function:thiamine pyrophosphate binding(GO:0030976)
TRIAE_CS42_4DS_TGACv1_361542_AA1169880	1745	229	5.42	282	5.85	276	6.29	71	1.66	92	2.1	75	1.76	167.176	-1.47231	0.161091	-9.13964	6.27e-20	5.16e-17	Down	gi|475626184|gb|EMT33234.1| Putative clathrin assembly protein [Aegilops tauschii]	_	molecular_function:1-phosphatidylinositol binding(GO:0005545);cellular_component:clathrin coat(GO:0030118);molecular_function:clathrin binding(GO:0030276);biological_process:clathrin coat assembly(GO:0048268)
TRIAE_CS42_7DL_TGACv1_604678_AA2000600	951	2	0.1	3	0.14	3	0.15	74	3.78	54	2.68	57	2.92	32.6664	2.31553	0.253643	9.12911	6.91e-20	5.61e-17	Ups		_	_
TRIAE_CS42_7DL_TGACv1_602792_AA1968750	1659	46	1.21	65	1.49	62	1.57	249	6.47	170	4.29	221	5.74	136.45	1.66884	0.183189	9.10994	8.24e-20	6.61e-17	Ups	gi|326495972|dbj|BAJ90608.1| predicted protein [Hordeum vulgare subsp. vulgare]<>gi|326510219|dbj|BAJ87326.1| predicted protein [Hordeum vulgare subsp. vulgare]<>gi|326532716|dbj|BAJ89203.1| predicted protein [Hordeum vulgare subsp. vulgare]<>gi|326533090|dbj|BAJ93517.1| predicted protein [Hordeum vulgare subsp. vulgare]	_	_
TRIAE_CS42_3B_TGACv1_223411_AA0781690	2220	109	2.79	111	2.49	113	2.79	18	0.46	18	0.44	10	0.25	61.6719	-2.04062	0.224156	-9.10357	8.74e-20	6.93e-17	Down	gi|300681554|emb|CBH32652.1| polygalacturonase precursor, putative,expressed [Triticum aestivum]<>gi|669027161|emb|CDM80413.1| unnamed protein product [Triticum aestivum]	_	molecular_function:polygalacturonase activity(GO:0004650);biological_process:carbohydrate metabolic process(GO:0005975)
TRIAE_CS42_2BS_TGACv1_147245_AA0480460	1408	208	9.68	388	15.83	262	11.75	67	3.09	86	3.86	66	3.05	173.851	-1.62095	0.178495	-9.08116	1.07e-19	8.41e-17	Down		_	_
TRIAE_CS42_6BS_TGACv1_513704_AA1647720	1753	262	7.09	253	6	243	6.34	80	2.15	82	2.14	68	1.83	161.68	-1.46966	0.161882	-9.0786	1.1e-19	8.51e-17	Down	gi|281346360|gb|EFB21944.1| hypothetical protein PANDA_009096, partial [Ailuropoda melanoleuca]	_	_
TRIAE_CS42_1DL_TGACv1_063593_AA0228900	955	59	2.85	100	4.24	72	3.35	259	12.41	233	10.85	230	11.03	159.303	1.51679	0.167158	9.07396	1.15e-19	8.77e-17	Ups	gi|326531216|dbj|BAK04959.1| predicted protein [Hordeum vulgare subsp. vulgare]	_	_
TRIAE_CS42_4BL_TGACv1_321705_AA1064360	1702	525	6.1	668	6.8	566	6.34	1718	19.78	1048	11.73	1338	15.42	979.749	1.20601	0.133179	9.05557	1.36e-19	1.03e-16	Ups	gi|90421300|gb|AAZ14085.2| root abundant factor [Hordeum vulgare]<>gi|90421306|gb|AAZ14086.2| root abundant factor [Hordeum vulgare]	K09286	_
TRIAE_CS42_5AS_TGACv1_393170_AA1269320	17675	1143	42.73	1584	51.93	1438	51.8	675	25.02	541	19.49	672	24.92	989.975	-1.01207	0.111856	-9.04797	1.46e-19	1.09e-16	Down	gi|473950973|gb|EMS50707.1| hypothetical protein TRIUR3_01418 [Triticum urartu]	_	_
TRIAE_CS42_4BL_TGACv1_320372_AA1037070	938	670	29.48	940	36.27	787	33.37	278	12.13	398	16.87	319	13.92	553.358	-1.11946	0.124421	-8.99729	2.31e-19	1.69e-16	Down	gi|473786903|gb|EMS46235.1| hypothetical protein TRIUR3_31080 [Triticum urartu]	_	_
TRIAE_CS42_2DS_TGACv1_177325_AA0573540	2720	487	5	658	5.92	570	5.64	1567	15.94	1329	13.14	983	10.01	932.906	1.16764	0.129809	8.99509	2.36e-19	1.7e-16	Ups	gi|474147743|gb|EMS56851.1| Cysteine-rich receptor-like protein kinase 10 [Triticum urartu]	_	molecular_function:transferase activity, transferring phosphorus-containing groups(GO:0016772);molecular_function:nucleotide binding(GO:0000166)
TRIAE_CS42_5BL_TGACv1_413043_AA1367940	1105	170	6.97	257	9.24	247	9.75	35	1.42	26	1.03	66	2.68	129.876	-1.8526	0.206368	-8.97718	2.78e-19	1.96e-16	Down	gi|670020647|emb|CDJ26491.1| unnamed protein product [Triticum aestivum]	_	_
TRIAE_CS42_1DL_TGACv1_062546_AA0216230	909	473	21.47	580	23.09	507	22.18	154	6.93	246	10.76	185	8.33	350.21	-1.23869	0.138621	-8.93586	4.04e-19	2.76e-16	Down	gi|475606932|gb|EMT26540.1| hypothetical protein F775_29153 [Aegilops tauschii]	_	cellular_component:nucleus(GO:0005634)
TRIAE_CS42_6BL_TGACv1_499448_AA1582770	2206	46	1.22	75	1.75	60	1.54	194	5.11	191	4.89	209	5.51	129.678	1.55004	0.175588	8.82772	1.07e-18	7.07e-16	Ups	gi|326488381|dbj|BAJ93859.1| predicted protein [Hordeum vulgare subsp. vulgare]	_	molecular_function:heme binding(GO:0020037);molecular_function:metal ion binding(GO:0046872)
TRIAE_CS42_1BL_TGACv1_033737_AA0141740	930	527	25.83	881	37.87	730	34.48	253	12.29	303	14.31	287	13.95	485.12	-1.17213	0.133077	-8.80787	1.28e-18	8.35e-16	Down	gi|475566186|gb|EMT14978.1| Non-symbiotic hemoglobin [Aegilops tauschii]	_	molecular_function:heme binding(GO:0020037);biological_process:oxygen transport(GO:0015671);cellular_component:cell wall(GO:0005618);molecular_function:iron ion binding(GO:0005506);cellular_component:plasma membrane(GO:0005886);molecular_function:oxygen binding(GO:0019825)
TRIAE_CS42_5DL_TGACv1_433312_AA1409200	6693	171	1.3	216	1.44	183	1.34	466	3.51	423	3.1	381	2.87	306.953	1.1453	0.130181	8.79779	1.4e-18	9.05e-16	Ups	gi|474118233|gb|EMS55931.1| 5'-3' exoribonuclease 2 [Triticum urartu]	K12619	molecular_function:metal ion binding(GO:0046872);molecular_function:nucleoside-triphosphatase activity(GO:0017111);biological_process:protein metabolic process(GO:0019538);molecular_function:ATP binding(GO:0005524);molecular_function:DNA binding(GO:0003677);cellular_component:chloroplast envelope(GO:0009941);cellular_component:apoplast(GO:0048046);molecular_function:translation elongation factor …
TRIAE_CS42_7AL_TGACv1_557575_AA1783340	2845	89	2.64	122	3.17	90	2.57	338	9.93	229	6.54	354	10.4	204.69	1.48296	0.16954	8.74693	2.19e-18	1.41e-15	Ups	gi|1002273938|ref|XP_015641288.1| PREDICTED: ABC transporter A family member 8 [Oryza sativa Japonica Group]<>gi|50725429|dbj|BAD32901.1| putative ABC family transporter [Oryza sativa Japonica Group]<>gi|113596000|dbj|BAF19874.1| Os06g0589300 [Oryza sativa Japonica Group]<>gi|215694525|dbj|BAG89518.1| unnamed protein product [Oryza sativa Japonica Group]<>gi|937923491|dbj|BAS98408.1| Os06g0589300…	_	;molecular_function:ATP binding(GO:0005524);molecular_function:ATPase activity(GO:0016887);cellular_component:membrane(GO:0016020)
TRIAE_CS42_4AL_TGACv1_290053_AA0980920	3663	1119	4.34	1742	5.92	1753	6.55	709	2.73	646	2.41	609	2.34	1074.24	-1.08445	0.124144	-8.73539	2.43e-18	1.53e-15	Down	gi|474153434|gb|EMS57011.1| Ribulose bisphosphate carboxylase/oxygenase activase B, chloroplastic [Triticum urartu]	_	molecular_function:ATP binding(GO:0005524);cellular_component:chloroplast stroma(GO:0009570)
TRIAE_CS42_5DS_TGACv1_456793_AA1478070	1807	416	5.55	679	7.94	612	7.86	216	2.86	181	2.33	228	3.02	379.738	-1.25361	0.143617	-8.72883	2.57e-18	1.6e-15	Down	gi|326499908|dbj|BAJ90789.1| predicted protein [Hordeum vulgare subsp. vulgare]	K01623	biological_process:glycolytic process(GO:0006096);molecular_function:fructose-bisphosphate aldolase activity(GO:0004332)
TRIAE_CS42_2AL_TGACv1_094444_AA0297600	1779	196	5.41	347	8.4	298	7.93	618	16.91	733	19.5	598	16.38	464.581	1.19307	0.136995	8.70889	3.07e-18	1.89e-15	Ups	gi|341864985|dbj|BAK53494.1| WRKY45-like transcription factor [Triticum aestivum]	_	_
TRIAE_CS42_6DL_TGACv1_526828_AA1692790	2912	411	8.91	476	9.05	368	7.69	97	2.09	182	3.8	129	2.78	271.095	-1.384	0.15955	-8.6744	4.16e-18	2.52e-15	Down	gi|475562916|gb|EMT14159.1| hypothetical protein F775_05095 [Aegilops tauschii]	_	molecular_function:catalytic activity(GO:0003824);biological_process:metabolic process(GO:0008152)
TRIAE_CS42_4DL_TGACv1_344443_AA1147220	10186	960	12	1146	12.56	1096	13.2	333	4.13	420	5.06	551	6.83	737.502	-1.139	0.13134	-8.67215	4.24e-18	2.54e-15	Down	gi|428697091|gb|AFZ61904.1| MATE1D [Triticum aestivum]	_	_
TRIAE_CS42_1BL_TGACv1_030243_AA0083490	675	223	13.63	338	18.12	287	16.91	100	6.06	66	3.89	86	5.22	178.814	-1.46541	0.169121	-8.66486	4.52e-18	2.69e-15	Down		_	_
TRIAE_CS42_3DS_TGACv1_272319_AA0918870	2709	449	10.02	441	8.63	332	7.14	138	3.05	145	3.12	164	3.63	273.191	-1.26047	0.14568	-8.65226	5.05e-18	2.97e-15	Down	gi|383100775|emb|CCG48006.1| polygalacturonase, putative, expressed [Triticum aestivum]	_	molecular_function:polygalacturonase activity(GO:0004650);biological_process:carbohydrate metabolic process(GO:0005975)
TRIAE_CS42_4BL_TGACv1_321272_AA1058240	594	86	5.97	112	6.82	124	8.3	256	17.63	300	20.08	317	21.85	199.862	1.35426	0.15669	8.64293	5.48e-18	3.2e-15	Ups	gi|475561348|gb|EMT13765.1| hypothetical protein F775_32808 [Aegilops tauschii]	_	_
TRIAE_CS42_7BL_TGACv1_577356_AA1873290	1584	189	4.92	228	5.21	252	6.33	65	1.68	70	1.76	61	1.58	141.232	-1.48289	0.172063	-8.61831	6.79e-18	3.93e-15	Down	gi|326519907|dbj|BAK03878.1| predicted protein [Hordeum vulgare subsp. vulgare]	_	molecular_function:sulfotransferase activity(GO:0008146)
TRIAE_CS42_2AS_TGACv1_113707_AA0359670	2536	105	1.11	113	1.05	101	1.03	325	3.4	270	2.75	250	2.62	194.755	1.32852	0.1545	8.59883	8.05e-18	4.62e-15	Ups	gi|473849334|gb|EMS47464.1| Transcription factor bHLH47 [Triticum urartu]	_	_
TRIAE_CS42_4DS_TGACv1_361664_AA1171230	3553	1444	18.29	2182	24.24	2253	27.5	947	11.89	823	10.04	744	9.35	1371.44	-1.07762	0.125367	-8.59571	8.28e-18	4.7e-15	Down	gi|474153434|gb|EMS57011.1| Ribulose bisphosphate carboxylase/oxygenase activase B, chloroplastic [Triticum urartu]	_	molecular_function:ATP binding(GO:0005524);cellular_component:chloroplast stroma(GO:0009570)
TRIAE_CS42_6AS_TGACv1_486383_AA1560850	3485	368	1.87	493	2.19	418	2.04	143	0.72	173	0.85	190	0.96	291.357	-1.16695	0.136541	-8.54656	1.27e-17	7.08e-15	Down	gi|62176934|emb|CAG25609.1| acid beta-fructofuranosidase precursor [Triticum aestivum]	K01193	molecular_function:sucrose alpha-glucosidase activity(GO:0004575);biological_process:carbohydrate metabolic process(GO:0005975)
TRIAE_CS42_3DL_TGACv1_250396_AA0867500	3335	94	3.14	120	3.52	123	3.96	280	9.28	289	9.31	274	9.09	197.165	1.26665	0.148621	8.5227	1.56e-17	8.55e-15	Ups	gi|113734244|dbj|BAF30424.1| basic helix-loop-helix protein [Hordeum vulgare subsp. vulgare]	_	molecular_function:protein dimerization activity(GO:0046983);molecular_function:DNA binding(GO:0003677)
TRIAE_CS42_3AL_TGACv1_193663_AA0617020	2342	656	22.52	882	26.56	830	27.46	334	11.37	254	8.4	381	12.98	545.572	-1.1269	0.132489	-8.50566	1.81e-17	9.77e-15	Down	gi|473904624|gb|EMS49296.1| hypothetical protein TRIUR3_13970 [Triticum urartu]	K03542	_
TRIAE_CS42_3AS_TGACv1_212130_AA0698010	925	178	8.83	211	9.18	135	6.45	387	19.03	398	19.02	495	24.36	301.27	1.24408	0.146271	8.50533	1.81e-17	9.77e-15	Ups	gi|474117271|gb|EMS55908.1| hypothetical protein TRIUR3_32635 [Triticum urartu]<>gi|475506120|gb|EMT04800.1| hypothetical protein F775_27202 [Aegilops tauschii]	_	_
TRIAE_CS42_7BL_TGACv1_578433_AA1894790	18374	29	0.13	19	0.07	28	0.12	134	0.58	125	0.53	108	0.47	74.6084	1.8092	0.212751	8.50388	1.83e-17	9.81e-15	Ups	gi|475580078|gb|EMT18504.1| Putative coatomer subunit beta'-3 [Aegilops tauschii]	_	molecular_function:protein kinase activity(GO:0004672);molecular_function:nucleotide binding(GO:0000166)
TRIAE_CS42_2DS_TGACv1_178119_AA0591130	8244	314	2.75	414	3.18	478	4.04	955	8.3	833	7.04	776	6.75	629.17	1.0835	0.127678	8.48619	2.14e-17	1.13e-14	Ups	gi|357116720|ref|XP_003560126.1| PREDICTED: cysteine-rich receptor-like protein kinase 10 isoform X4 [Brachypodium distachyon]	_	_
TRIAE_CS42_6BL_TGACv1_502650_AA1625940	4720	323	5.77	373	5.84	392	6.74	1159	20.51	682	11.73	807	14.29	625.233	1.23577	0.146252	8.44959	2.92e-17	1.51e-14	Ups	gi|944068758|gb|KQK04242.1| hypothetical protein BRADI_2g12580 [Brachypodium distachyon]	_	_
TRIAE_CS42_1AS_TGACv1_019677_AA0069790	956	485	22.93	335	13.89	429	19.54	143	6.7	139	6.33	145	6.8	276.225	-1.33469	0.158305	-8.4311	3.42e-17	1.76e-14	Down	gi|641739915|gb|AIA66989.1| defensin [Triticum aestivum]	_	biological_process:defense response(GO:0006952)
TRIAE_CS42_7DL_TGACv1_604239_AA1995620	2358	80	1.45	89	1.42	144	2.52	955	17.19	1363	23.84	711	12.81	562.748	2.08554	0.247829	8.41523	3.92e-17	2e-14	Ups	gi|326517344|dbj|BAK00039.1| predicted protein [Hordeum vulgare subsp. vulgare]	_	biological_process:lipid metabolic process(GO:0006629);molecular_function:hydrolase activity, acting on ester bonds(GO:0016788)
TRIAE_CS42_2AS_TGACv1_112241_AA0333980	4397	1330	7.2	1748	8.3	1011	5.28	207	1.11	292	1.52	337	1.81	796.841	-1.74903	0.209193	-8.36084	6.23e-17	3.08e-14	Down	gi|473724003|gb|EMS45005.1| putative 5'-adenylylsulfate reductase 1, chloroplastic [Triticum urartu]	K05907	biological_process:cell redox homeostasis(GO:0045454);biological_process:cysteine biosynthetic process(GO:0019344);biological_process:sulfate reduction(GO:0019419);molecular_function:phosphoadenylyl-sulfate reductase (thioredoxin) activity(GO:0004604)
TRIAE_CS42_1DS_TGACv1_080324_AA0245930	9550	211	1.21	296	1.49	203	1.12	825	4.7	604	3.34	454	2.59	432.963	1.32849	0.158957	8.35753	6.4e-17	3.14e-14	Ups	gi|719992496|ref|XP_010253590.1| PREDICTED: isovaleryl-CoA dehydrogenase, mitochondrial [Nelumbo nucifera]	K00253	_
TRIAE_CS42_7BS_TGACv1_592478_AA1938900	1181	99	3.46	141	4.32	92	3.1	23	0.8	16	0.54	15	0.52	62.3287	-1.87003	0.22391	-8.35169	6.73e-17	3.27e-14	Down	gi|475481179|gb|EMT02870.1| Zinc finger protein CONSTANS-LIKE 3 [Aegilops tauschii]	_	molecular_function:zinc ion binding(GO:0008270);cellular_component:intracellular(GO:0005622)
TRIAE_CS42_4AS_TGACv1_308636_AA1028740	4446	395	9.65	488	10.46	398	9.37	178	4.31	139	3.27	193	4.68	292.711	-1.15525	0.138538	-8.33893	7.5e-17	3.62e-14	Down	gi|326507956|dbj|BAJ86721.1| predicted protein [Hordeum vulgare subsp. vulgare]	K00799	_
TRIAE_CS42_1DL_TGACv1_063761_AA0230650	2123	253	5.44	360	6.79	352	7.29	99	2.11	83	1.72	129	2.75	208.008	-1.37557	0.165385	-8.31737	8.99e-17	4.31e-14	Down	gi|357131906|ref|XP_003567574.1| PREDICTED: polygalacturonase At1g48100 [Brachypodium distachyon]<>gi|944068575|gb|KQK04059.1| hypothetical protein BRADI_2g11380 [Brachypodium distachyon]	K01213	cellular_component:extracellular region(GO:0005576);molecular_function:polygalacturonase activity(GO:0004650);biological_process:carbohydrate metabolic process(GO:0005975)
TRIAE_CS42_2DL_TGACv1_158862_AA0527380	1375	101	3.77	162	5.3	151	5.43	370	13.69	324	11.65	323	11.96	238.837	1.24531	0.149968	8.30378	1.01e-16	4.76e-14	Ups	gi|475497000|gb|EMT03963.1| Acyl-protein thioesterase 1 [Aegilops tauschii]	_	_
TRIAE_CS42_5BL_TGACv1_406377_AA1344770	836	229	11.3	281	12.16	323	15.36	69	3.38	101	4.8	93	4.55	179.06	-1.39931	0.16876	-8.29176	1.12e-16	5.23e-14	Down		_	_
TRIAE_CS42_7AL_TGACv1_557575_AA1783300	3735	52	1.66	38	1.06	44	1.35	176	5.57	186	5.72	134	4.25	105.81	1.61	0.194501	8.27759	1.26e-16	5.84e-14	Ups	gi|473803926|gb|EMS46643.1| hypothetical protein TRIUR3_02273 [Triticum urartu]	_	;molecular_function:ATP binding(GO:0005524);molecular_function:ATPase activity(GO:0016887);cellular_component:membrane(GO:0016020)
TRIAE_CS42_5DL_TGACv1_433817_AA1422910	753	83	4.55	145	6.97	128	6.76	10	0.54	18	0.95	26	1.41	66.1617	-1.89051	0.229268	-8.24584	1.64e-16	7.47e-14	Down	gi|326498533|dbj|BAJ98694.1| predicted protein [Hordeum vulgare subsp. vulgare]	_	cellular_component:membrane(GO:0016020);cellular_component:chloroplast(GO:0009507)
TRIAE_CS42_U_TGACv1_641584_AA2098830	3397	425	7.28	479	7.2	415	6.85	202	3.43	165	2.72	201	3.42	309.109	-1.06612	0.12946	-8.23516	1.79e-16	8.11e-14	Down	gi|326500588|dbj|BAK06380.1| predicted protein [Hordeum vulgare subsp. vulgare]	K01669	biological_process:DNA repair(GO:0006281);molecular_function:DNA photolyase activity(GO:0003913)
TRIAE_CS42_2AL_TGACv1_093114_AA0272300	4483	156	1.92	157	1.69	171	2.02	34	0.41	52	0.62	33	0.4	98.5039	-1.61147	0.195754	-8.23209	1.84e-16	8.26e-14	Down	gi|474207816|gb|EMS58765.1| Potassium channel SKOR [Triticum urartu]	_	_
TRIAE_CS42_4AL_TGACv1_290434_AA0985470	3607	324	5.81	260	4.09	292	5.04	75	1.33	115	1.99	92	1.64	190.185	-1.3831	0.168668	-8.20009	2.4e-16	1.07e-13	Down	gi|669029521|emb|CDM83756.1| unnamed protein product [Triticum aestivum]	K14611	biological_process:transmembrane transport(GO:0055085);cellular_component:membrane(GO:0016020);molecular_function:transporter activity(GO:0005215);cellular_component:integral component of membrane(GO:0016021)
TRIAE_CS42_4AL_TGACv1_289001_AA0963150	1926	543	12.29	776	15.41	719	15.68	200	4.49	240	5.23	334	7.5	458.846	-1.2023	0.147128	-8.17178	3.04e-16	1.33e-13	Down	gi|475435434|gb|EMT01311.1| Gibberellin 20 oxidase 1 [Aegilops tauschii]	_	biological_process:oxidation-reduction process(GO:0055114);molecular_function:iron ion binding(GO:0005506);molecular_function:oxidoreductase activity, acting on paired donors, with incorporation or reduction of molecular oxygen, 2-oxoglutarate as one donor, and incorporation of one atom each of oxygen into both donors(GO:0016706)
TRIAE_CS42_1BL_TGACv1_030599_AA0095340	896	508	23.4	766	30.94	636	28.23	212	9.68	321	14.25	244	11.15	437.803	-1.12568	0.138525	-8.1262	4.43e-16	1.91e-13	Down	gi|474198927|gb|EMS58436.1| hypothetical protein TRIUR3_29795 [Triticum urartu]	_	cellular_component:nucleus(GO:0005634)
TRIAE_CS42_6BL_TGACv1_505061_AA1629060	2119	423	10.61	674	14.82	515	12.44	222	5.52	248	5.99	196	4.88	370.835	-1.1057	0.136071	-8.12594	4.44e-16	1.91e-13	Down	gi|475529167|gb|EMT07737.1| O-methyltransferase ZRP4 [Aegilops tauschii]	_	molecular_function:O-methyltransferase activity(GO:0008171);molecular_function:protein dimerization activity(GO:0046983);biological_process:methylation(GO:0032259)
TRIAE_CS42_3DS_TGACv1_272861_AA0925850	9484	362	5.96	491	7.09	490	7.78	149	2.43	185	2.94	202	3.3	307.055	-1.14878	0.141836	-8.0993	5.53e-16	2.35e-13	Down	gi|474369477|gb|EMS63747.1| Fatty acyl-CoA reductase 1 [Triticum urartu]	K13356	molecular_function:fatty-acyl-CoA reductase (alcohol-forming) activity(GO:0080019);molecular_function:nucleotide binding(GO:0000166)
TRIAE_CS42_5BS_TGACv1_424091_AA1386830	5899	132	2.28	144	2.18	166	2.76	453	7.75	286	4.75	450	7.7	273.454	1.32718	0.163912	8.09692	5.64e-16	2.38e-13	Ups	gi|475557113|gb|EMT12760.1| Sn1-specific diacylglycerol lipase alpha [Aegilops tauschii]	_	biological_process:lipid metabolic process(GO:0006629);molecular_function:carboxylic ester hydrolase activity(GO:0052689)
TRIAE_CS42_2BS_TGACv1_145943_AA0450210	3045	294	6.12	472	8.62	408	8.19	106	2.19	169	3.39	88	1.82	249.53	-1.40598	0.173686	-8.09491	5.73e-16	2.4e-13	Down	gi|326487257|dbj|BAJ89613.1| predicted protein [Hordeum vulgare subsp. vulgare]<>gi|326506220|dbj|BAJ86428.1| predicted protein [Hordeum vulgare subsp. vulgare]	K15400	molecular_function:transferase activity, transferring acyl groups other than amino-acyl groups(GO:0016747)
TRIAE_CS42_4AS_TGACv1_307934_AA1024560	1119	588	28.15	682	28.63	598	27.59	1707	81.03	1016	46.87	1282	60.89	981.105	1.08811	0.134862	8.06835	7.13e-16	2.97e-13	Ups	gi|474033674|gb|EMS53055.1| Universal stress protein A-like protein [Triticum urartu]	_	biological_process:response to stress(GO:0006950)
TRIAE_CS42_4BS_TGACv1_328939_AA1095890	1604	109	2.8	165	3.72	191	4.74	377	9.62	408	10.11	353	9.01	267.624	1.23064	0.152969	8.04503	8.62e-16	3.55e-13	Ups	gi|475619151|gb|EMT30672.1| Aspartic proteinase nepenthesin-2 [Aegilops tauschii]	_	_
TRIAE_CS42_2DS_TGACv1_177322_AA0573360	639	483	33.39	792	48.01	762	50.76	283	19.4	247	16.45	294	20.16	466.621	-1.12813	0.140371	-8.0368	9.22e-16	3.77e-13	Down	gi|326505272|dbj|BAK03023.1| predicted protein [Hordeum vulgare subsp. vulgare]<>gi|326531248|dbj|BAK04975.1| predicted protein [Hordeum vulgare subsp. vulgare]	_	cellular_component:plastid(GO:0009536)
TRIAE_CS42_2DS_TGACv1_178063_AA0590140	1234	528	17.66	824	24.17	803	25.88	294	9.75	242	7.8	331	10.98	493.235	-1.13452	0.141233	-8.03301	9.51e-16	3.86e-13	Down	gi|475597219|gb|EMT23574.1| hypothetical protein F775_23092 [Aegilops tauschii]	_	_
TRIAE_CS42_5BS_TGACv1_423968_AA1385480	4489	240	5.51	313	6.3	229	5.07	93	2.12	95	2.1	93	2.12	173.209	-1.25637	0.156524	-8.02668	1e-15	4.04e-13	Down	gi|474367760|gb|EMS63596.1| Cucumisin [Triticum urartu]	_	molecular_function:peptidase activity(GO:0008233)
TRIAE_CS42_7DL_TGACv1_603579_AA1985880	1746	231	6.11	375	8.69	416	10.6	114	2.99	117	2.98	80	2.1	216.967	-1.41772	0.176897	-8.01443	1.11e-15	4.44e-13	Down	gi|475579248|gb|EMT18295.1| O-methyltransferase ZRP4 [Aegilops tauschii]	_	molecular_function:O-methyltransferase activity(GO:0008171);molecular_function:protein dimerization activity(GO:0046983);biological_process:methylation(GO:0032259)
TRIAE_CS42_5AS_TGACv1_392499_AA1259600	1810	247	3.09	402	4.41	402	4.85	120	1.49	108	1.3	132	1.64	229.808	-1.30218	0.16311	-7.98343	1.42e-15	5.64e-13	Down	gi|473848356|gb|EMS47455.1| Fructose-bisphosphate aldolase, chloroplastic [Triticum urartu]	K01623	biological_process:glycolytic process(GO:0006096);molecular_function:fructose-bisphosphate aldolase activity(GO:0004332)
TRIAE_CS42_7BL_TGACv1_578202_AA1891030	1295	402	15.32	412	13.77	288	10.58	106	4	129	4.74	156	5.9	244.053	-1.27126	0.159351	-7.9777	1.49e-15	5.83e-13	Down	gi|475571107|gb|EMT16173.1| hypothetical protein F775_32865 [Aegilops tauschii]	_	_
TRIAE_CS42_1AL_TGACv1_000527_AA0013960	4711	15	0.21	19	0.23	16	0.22	103	1.44	76	1.03	93	1.3	54.1982	1.81752	0.227827	7.97763	1.49e-15	5.83e-13	Ups	gi|475561925|gb|EMT13879.1| Putative LRR receptor-like serine/threonine-protein kinase [Aegilops tauschii]	_	molecular_function:kinase activity(GO:0016301);cellular_component:cytoplasmic membrane-bounded vesicle(GO:0016023)
TRIAE_CS42_5BL_TGACv1_406695_AA1348840	3849	382	3.03	520	3.61	417	3.18	181	1.42	205	1.56	199	1.56	310.968	-1.02429	0.128465	-7.97326	1.55e-15	5.98e-13	Down	gi|475576379|gb|EMT17527.1| hypothetical protein F775_11088 [Aegilops tauschii]	_	_
TRIAE_CS42_5AL_TGACv1_375786_AA1227140	2968	13	0.27	13	0.24	19	0.38	82	1.68	162	3.23	72	1.48	60.6417	1.91171	0.23995	7.96712	1.62e-15	6.21e-13	Ups		_	_
TRIAE_CS42_1DL_TGACv1_063886_AA0231430	2506	491	8.9	746	11.86	642	11.21	312	5.61	262	4.58	237	4.26	438.936	-1.05377	0.132337	-7.9628	1.68e-15	6.39e-13	Down	gi|357128096|ref|XP_003565712.1| PREDICTED: pectinesterase-like [Brachypodium distachyon]<>gi|944068645|gb|KQK04129.1| hypothetical protein BRADI_2g11850 [Brachypodium distachyon]	K01051	molecular_function:pectinesterase activity(GO:0030599);biological_process:cell wall modification(GO:0042545);biological_process:negative regulation of catalytic activity(GO:0043086);molecular_function:aspartyl esterase activity(GO:0045330);cellular_component:cell wall(GO:0005618);molecular_function:enzyme inhibitor activity(GO:0004857)
TRIAE_CS42_4AL_TGACv1_288261_AA0942630	1019	161	8	295	12.86	216	10.35	651	32.09	421	20.17	640	31.57	397.992	1.27913	0.160764	7.95653	1.77e-15	6.64e-13	Ups	gi|475623495|gb|EMT32240.1| hypothetical protein F775_30861 [Aegilops tauschii]	_	_
TRIAE_CS42_7AS_TGACv1_569172_AA1809110	924	190	11.48	246	13.04	168	9.78	540	32.35	373	21.72	477	28.59	332.867	1.16733	0.146715	7.95648	1.77e-15	6.64e-13	Ups	gi|475623497|gb|EMT32242.1| hypothetical protein F775_18516 [Aegilops tauschii]	_	_
TRIAE_CS42_5DL_TGACv1_433307_AA1408890	717	62	3.57	85	4.29	66	3.66	176	10.04	218	12.09	200	11.42	134.791	1.358	0.170856	7.9482	1.89e-15	7.06e-13	Ups		_	_
TRIAE_CS42_1AL_TGACv1_000396_AA0011040	1123	309	11.35	429	13.83	414	14.66	1136	41.39	663	23.48	864	31.5	637.487	1.17043	0.147625	7.92843	2.22e-15	8.24e-13	Ups	gi|721669570|ref|XP_010236322.1| PREDICTED: uncharacterized protein LOC104583970 [Brachypodium distachyon]<>gi|944058321|gb|KQJ93911.1| hypothetical protein BRADI_3g07435 [Brachypodium distachyon]	_	_
TRIAE_CS42_4BS_TGACv1_330635_AA1108340	3527	182	3.47	171	2.86	183	3.36	46	0.87	54	0.99	59	1.11	113.842	-1.43805	0.182393	-7.88436	3.16e-15	1.16e-12	Down	gi|669029521|emb|CDM83756.1| unnamed protein product [Triticum aestivum]	K14611	biological_process:transmembrane transport(GO:0055085);cellular_component:integral component of membrane(GO:0016021);molecular_function:transporter activity(GO:0005215)
TRIAE_CS42_5BL_TGACv1_404911_AA1314600	2285	83	1.82	127	2.44	75	1.59	263	5.72	310	6.56	214	4.66	178.721	1.34813	0.171571	7.85756	3.92e-15	1.43e-12	Ups	gi|326517862|dbj|BAK07183.1| predicted protein [Hordeum vulgare subsp. vulgare]	_	molecular_function:hydrolase activity(GO:0016787)
TRIAE_CS42_2AL_TGACv1_093579_AA0282940	5245	545	10.29	511	8.46	534	9.72	166	3.11	152	2.77	266	4.98	356.887	-1.23483	0.157465	-7.8419	4.44e-15	1.61e-12	Down		_	_
TRIAE_CS42_4AL_TGACv1_288251_AA0942400	5655	325	4.91	351	4.65	357	5.19	944	14.13	701	10.2	586	8.78	545.208	1.08732	0.138843	7.83128	4.83e-15	1.74e-12	Ups	gi|357141370|ref|XP_003572200.1| PREDICTED: methylcrotonoyl-CoA carboxylase beta chain, mitochondrial [Brachypodium distachyon]<>gi|944062721|gb|KQJ98311.1| hypothetical protein BRADI_3g36140 [Brachypodium distachyon]	K01969	molecular_function:ligase activity(GO:0016874)
TRIAE_CS42_7DL_TGACv1_602694_AA1965500	3485	674	17.74	701	16.18	681	17.27	1793	46.79	1283	32.54	1117	29.17	1043.42	1.02164	0.130597	7.82283	5.16e-15	1.85e-12	Ups	gi|514766805|ref|XP_004966088.1| PREDICTED: probable inositol oxygenase [Setaria italica]<>gi|944247435|gb|KQL11729.1| hypothetical protein SETIT_006965mg [Setaria italica]	K00469	biological_process:oxidation-reduction process(GO:0055114);molecular_function:inositol oxygenase activity(GO:0050113);biological_process:inositol catabolic process(GO:0019310);biological_process:L-ascorbic acid biosynthetic process(GO:0019853);biological_process:syncytium formation(GO:0006949);cellular_component:cytoplasm(GO:0005737);molecular_function:iron ion binding(GO:0005506)
TRIAE_CS42_3DS_TGACv1_271635_AA0904450	1423	175	5.52	199	5.51	203	6.17	47	1.47	56	1.7	72	2.25	122.865	-1.41257	0.180718	-7.81643	5.43e-15	1.94e-12	Down	gi|669028336|emb|CDM82102.1| unnamed protein product [Triticum aestivum]	K01183	molecular_function:chitinase activity(GO:0004568);biological_process:chitin catabolic process(GO:0006032);cellular_component:cell wall(GO:0005618);biological_process:polysaccharide catabolic process(GO:0000272);biological_process:cell wall macromolecule catabolic process(GO:0016998)
TRIAE_CS42_1BL_TGACv1_031136_AA0108440	1349	0	0	9	0.24	4	0.12	68	2.06	39	1.15	88	2.67	35.1558	2.00024	0.256266	7.80533	5.93e-15	2.09e-12	Ups	gi|474086682|gb|EMS54690.1| Xylanase inhibitor protein 1 [Triticum urartu]	K01183	molecular_function:hydrolase activity, hydrolyzing O-glycosyl compounds(GO:0004553);biological_process:xylan catabolic process(GO:0045493)
TRIAE_CS42_3AL_TGACv1_197445_AA0666300	1479	30	0.6	31	0.54	21	0.4	129	2.56	90	1.73	134	2.66	73.1553	1.67231	0.215988	7.74259	9.74e-15	3.36e-12	Ups		_	_
TRIAE_CS42_7BL_TGACv1_577676_AA1880730	4172	332	3.45	365	3.33	343	3.43	130	1.34	172	1.72	114	1.18	238.32	-1.14133	0.147421	-7.74196	9.79e-15	3.36e-12	Down	gi|475625237|gb|EMT32898.1| Putative LRR receptor-like serine/threonine-protein kinase [Aegilops tauschii]	_	molecular_function:metal ion binding(GO:0046872);molecular_function:nucleoside-triphosphatase activity(GO:0017111);biological_process:protein metabolic process(GO:0019538);molecular_function:ATP binding(GO:0005524);molecular_function:DNA binding(GO:0003677);cellular_component:chloroplast envelope(GO:0009941);cellular_component:apoplast(GO:0048046);molecular_function:translation elongation factor …
TRIAE_CS42_3AL_TGACv1_193584_AA0613780	2023	40	0.85	64	1.2	43	0.88	200	4.23	144	2.96	147	3.11	106.779	1.50454	0.194371	7.74055	9.9e-15	3.38e-12	Ups	gi|944238365|gb|KQL02703.1| hypothetical protein SETIT_013986mg [Setaria italica]	K09286	_
TRIAE_CS42_6BL_TGACv1_499405_AA1581650	2599	157	1.59	313	2.79	279	2.73	683	6.88	568	5.56	525	5.29	420.784	1.19534	0.154786	7.72254	1.14e-14	3.85e-12	Ups	gi|326496783|dbj|BAJ98418.1| predicted protein [Hordeum vulgare subsp. vulgare]	_	cellular_component:membrane(GO:0016020)
TRIAE_CS42_1DL_TGACv1_062696_AA0218320	1006	64	2.63	100	3.6	80	3.16	9	0.37	13	0.51	13	0.53	45.0233	-1.83481	0.237786	-7.71623	1.2e-14	4.01e-12	Down	gi|473942331|gb|EMS50391.1| hypothetical protein TRIUR3_26659 [Triticum urartu]	_	_
TRIAE_CS42_1DL_TGACv1_062564_AA0216620	1188	116	1.69	250	3.2	175	2.46	47	0.68	46	0.65	38	0.55	108.278	-1.57252	0.204034	-7.70716	1.29e-14	4.28e-12	Down	gi|474431953|gb|EMS68027.1| hypothetical protein TRIUR3_23641 [Triticum urartu]	_	_
TRIAE_CS42_5DL_TGACv1_435077_AA1445760	1125	120	4.93	152	5.47	170	6.73	16	0.65	45	1.78	32	1.3	87.0398	-1.66936	0.216739	-7.70216	1.34e-14	4.43e-12	Down	gi|475505580|gb|EMT04740.1| Non-specific lipid-transfer protein-like protein [Aegilops tauschii]	_	molecular_function:lipid binding(GO:0008289);biological_process:lipid transport(GO:0006869)
TRIAE_CS42_4DL_TGACv1_343316_AA1133120	2701	355	7.14	391	6.9	413	8	192	3.83	131	2.54	135	2.69	265.056	-1.15191	0.149763	-7.69153	1.45e-14	4.79e-12	Down	gi|357113866|ref|XP_003558722.1| PREDICTED: cyclic dof factor 1-like [Brachypodium distachyon]<>gi|944088080|gb|KQK23432.1| hypothetical protein BRADI_1g73710 [Brachypodium distachyon]	_	molecular_function:binding(GO:0005488)
TRIAE_CS42_2DS_TGACv1_177565_AA0580190	3597	548	8.21	647	8.5	422	6.09	117	1.74	233	3.36	209	3.1	354.514	-1.28425	0.167374	-7.67291	1.68e-14	5.51e-12	Down	gi|326524802|dbj|BAK04337.1| predicted protein [Hordeum vulgare subsp. vulgare]	K05907	biological_process:cell redox homeostasis(GO:0045454);biological_process:cysteine biosynthetic process(GO:0019344);biological_process:sulfate reduction(GO:0019419);molecular_function:phosphoadenylyl-sulfate reductase (thioredoxin) activity(GO:0004604);molecular_function:oxidoreductase activity, acting on a sulfur group of donors, disulfide as acceptor(GO:0016671)
TRIAE_CS42_4AS_TGACv1_307748_AA1023170	1457	127	4.3	184	5.46	123	4.01	23	0.77	45	1.47	34	1.14	86.7452	-1.59228	0.207934	-7.6576	1.89e-14	6.14e-12	Down	gi|475586856|gb|EMT20409.1| Acid phosphatase 1 [Aegilops tauschii]	K02866	molecular_function:acid phosphatase activity(GO:0003993)
TRIAE_CS42_2DL_TGACv1_160390_AA0550070	1425	149	5.24	274	8.45	230	7.8	422	14.72	577	19.56	488	17.03	356.122	1.14855	0.150192	7.64721	2.05e-14	6.59e-12	Ups	gi|475611108|gb|EMT27978.1| hypothetical protein F775_17443 [Aegilops tauschii]	_	biological_process:metal ion transport(GO:0030001);molecular_function:metal ion binding(GO:0046872)
TRIAE_CS42_3B_TGACv1_223199_AA0777850	2412	296	5.15	373	5.69	282	4.73	103	1.78	137	2.3	138	2.38	216.906	-1.1392	0.149971	-7.59614	3.05e-14	9.74e-12	Down	gi|669028247|emb|CDM81988.1| unnamed protein product [Triticum aestivum]	K15283	biological_process:transport(GO:0006810);cellular_component:integral component of membrane(GO:0016021);molecular_function:transporter activity(GO:0005215)
TRIAE_CS42_2AS_TGACv1_113145_AA0352050	4562	50	1.34	81	1.9	65	1.68	188	4.99	202	5.21	162	4.3	124.865	1.35166	0.17816	7.58676	3.28e-14	1.04e-11	Ups		_	_
TRIAE_CS42_1AL_TGACv1_001359_AA0029270	4080	201	3.33	269	3.91	301	4.8	77	1.26	94	1.5	96	1.58	169.554	-1.28013	0.168793	-7.584	3.35e-14	1.05e-11	Down	gi|326502920|dbj|BAJ99088.1| predicted protein, partial [Hordeum vulgare subsp. vulgare]	_	molecular_function:O-methyltransferase activity(GO:0008171);molecular_function:protein dimerization activity(GO:0046983);biological_process:methylation(GO:0032259)
TRIAE_CS42_4AS_TGACv1_306977_AA1015630	1127	129	2.81	280	5.34	268	5.62	65	1.4	60	1.26	44	0.95	136.827	-1.54412	0.203763	-7.57799	3.51e-14	1.1e-11	Down	gi|475599821|gb|EMT24337.1| High molecular mass early light-inducible protein HV58, chloroplastic [Aegilops tauschii]	_	_
TRIAE_CS42_5DL_TGACv1_434229_AA1432100	2120	56	1.25	124	2.43	89	1.92	12	0.27	11	0.24	15	0.33	49.2488	-1.8154	0.240094	-7.56121	3.99e-14	1.23e-11	Down	gi|475503974|gb|EMT04591.1| Phytoene synthase, chloroplastic [Aegilops tauschii]	K02291	_
TRIAE_CS42_4BS_TGACv1_329360_AA1100660	1588	84	2.18	114	2.6	141	3.53	21	0.54	19	0.48	27	0.7	66.0819	-1.68471	0.222986	-7.55523	4.18e-14	1.27e-11	Down	gi|475626184|gb|EMT33234.1| Putative clathrin assembly protein [Aegilops tauschii]	_	molecular_function:phospholipid binding(GO:0005543)
TRIAE_CS42_3DS_TGACv1_272966_AA0927060	1767	53	1.56	86	2.21	59	1.67	266	7.74	177	5.01	170	4.95	135.631	1.43209	0.190105	7.53317	4.95e-14	1.5e-11	Ups	gi|475589386|gb|EMT21138.1| hypothetical protein F775_05174 [Aegilops tauschii]	_	_
TRIAE_CS42_5DL_TGACv1_433740_AA1420990	4492	230	4.33	219	3.62	184	3.34	73	1.36	76	1.38	71	1.33	139.683	-1.27613	0.169765	-7.51701	5.6e-14	1.66e-11	Down	gi|474096867|gb|EMS55079.1| Beta-glucosidase 30 [Triticum urartu]	K01188	molecular_function:hydrolase activity, hydrolyzing O-glycosyl compounds(GO:0004553);cellular_component:plant-type cell wall(GO:0009505);biological_process:carbohydrate metabolic process(GO:0005975);biological_process:pollen tube growth(GO:0009860);cellular_component:mitochondrion(GO:0005739)
TRIAE_CS42_4BL_TGACv1_321131_AA1055910	3414	294	2.49	348	2.58	306	2.49	107	0.9	144	1.17	141	1.18	219.182	-1.09701	0.145937	-7.517	5.6e-14	1.66e-11	Down	gi|357113126|ref|XP_003558355.1| PREDICTED: exoglucanase XynX [Brachypodium distachyon]<>gi|944087252|gb|KQK22604.1| hypothetical protein BRADI_1g68310 [Brachypodium distachyon]	_	molecular_function:hydrolase activity, hydrolyzing O-glycosyl compounds(GO:0004553);biological_process:carbohydrate metabolic process(GO:0005975);cellular_component:mitochondrion(GO:0005739)
TRIAE_CS42_6BL_TGACv1_502324_AA1624290	2081	1	0.03	4	0.1	1	0.03	39	1.09	39	1.06	51	1.42	22.8121	1.93671	0.258001	7.5066	6.07e-14	1.78e-11	Ups	gi|397740894|gb|AFO63016.1| ACC oxidase [Hordeum vulgare]	K05933	biological_process:oxidation-reduction process(GO:0055114);molecular_function:oxidoreductase activity, acting on paired donors, with incorporation or reduction of molecular oxygen, 2-oxoglutarate as one donor, and incorporation of one atom each of oxygen into both donors(GO:0016706)
TRIAE_CS42_5BL_TGACv1_404971_AA1316650	979	120	5.06	160	5.91	166	6.74	26	1.09	52	2.11	21	0.88	88.5638	-1.61821	0.215587	-7.50607	6.09e-14	1.78e-11	Down	gi|326492433|dbj|BAK02000.1| predicted protein [Hordeum vulgare subsp. vulgare]<>gi|326521590|dbj|BAK00371.1| predicted protein [Hordeum vulgare subsp. vulgare]	_	_
TRIAE_CS42_2DS_TGACv1_178461_AA0595900	2841	252	5.75	310	6.2	244	5.36	91	2.06	125	2.75	83	1.88	180.254	-1.20911	0.161094	-7.50562	6.11e-14	1.78e-11	Down	gi|475616820|gb|EMT29891.1| Taxadien-5-alpha-ol O-acetyltransferase [Aegilops tauschii]	K15400	molecular_function:transferase activity, transferring acyl groups other than amino-acyl groups(GO:0016747)
TRIAE_CS42_3AL_TGACv1_194891_AA0641500	3043	273	7.59	423	10.31	325	8.7	105	2.89	131	3.51	153	4.22	229.471	-1.17687	0.156892	-7.5011	6.33e-14	1.84e-11	Down	gi|700895254|gb|AIU99984.1| drought induced 19 protein [Triticum aestivum]	_	_
TRIAE_CS42_2DS_TGACv1_178758_AA0600630	716	99	6.28	71	3.95	82	5.01	18	1.13	2	0.12	8	0.5	45.8487	-1.86201	0.249305	-7.46881	8.09e-14	2.33e-11	Down	gi|475490498|gb|EMT03502.1| hypothetical protein F775_32646 [Aegilops tauschii]	_	_
TRIAE_CS42_7AS_TGACv1_570911_AA1842340	1607	8	0.21	13	0.29	28	0.69	104	2.65	74	1.83	116	2.96	57.8671	1.7818	0.239364	7.44389	9.78e-14	2.79e-11	Ups	gi|326490700|dbj|BAJ90017.1| predicted protein [Hordeum vulgare subsp. vulgare]<>gi|326493830|dbj|BAJ85377.1| predicted protein [Hordeum vulgare subsp. vulgare]	_	molecular_function:aspartic-type endopeptidase activity(GO:0004190);biological_process:proteolysis(GO:0006508)
TRIAE_CS42_6AS_TGACv1_485866_AA1553530	5075	162	2.86	206	3.18	149	2.53	404	7.06	343	5.83	328	5.74	265.299	1.04088	0.140207	7.42388	1.14e-13	3.23e-11	Ups	gi|1009132835|ref|XP_015883586.1| PREDICTED: 2-oxoisovalerate dehydrogenase subunit beta 1, mitochondrial [Ziziphus jujuba]	K00167	molecular_function:catalytic activity(GO:0003824);biological_process:metabolic process(GO:0008152)
TRIAE_CS42_4DL_TGACv1_345885_AA1154620	3089	928	15.86	1423	21.33	1497	24.66	623	10.56	622	10.25	433	7.34	902.88	-1.03289	0.140337	-7.36009	1.84e-13	5.06e-11	Down	gi|475592095|gb|EMT21986.1| O-methyltransferase ZRP4 [Aegilops tauschii]	_	molecular_function:O-methyltransferase activity(GO:0008171);molecular_function:protein dimerization activity(GO:0046983);biological_process:methylation(GO:0032259)
TRIAE_CS42_1DL_TGACv1_062564_AA0216630	1029	24	1.07	75	2.92	50	2.14	0	0	1	0.04	3	0.13	24.2483	-1.90081	0.258334	-7.35793	1.87e-13	5.12e-11	Down	gi|475597048|gb|EMT23518.1| hypothetical protein F775_14184 [Aegilops tauschii]	_	_
TRIAE_CS42_4BS_TGACv1_329166_AA1098520	2883	159	4.14	244	5.57	217	5.44	2232	57.62	900	22.58	1627	42.03	908.599	1.83767	0.250629	7.33225	2.26e-13	6.1e-11	Ups	gi|473764222|gb|EMS45891.1| Alcohol dehydrogenase 3 [Triticum urartu]	K18857	molecular_function:oxidoreductase activity(GO:0016491);molecular_function:nucleotide binding(GO:0000166);biological_process:oxidation-reduction process(GO:0055114);molecular_function:zinc ion binding(GO:0008270)
TRIAE_CS42_1BL_TGACv1_030496_AA0092320	2796	143	2.39	191	2.8	169	2.72	53	0.88	59	0.95	28	0.46	104.579	-1.44801	0.198532	-7.2936	3.02e-13	8.11e-11	Down	gi|357128096|ref|XP_003565712.1| PREDICTED: pectinesterase-like [Brachypodium distachyon]<>gi|944068645|gb|KQK04129.1| hypothetical protein BRADI_2g11850 [Brachypodium distachyon]	K01051	molecular_function:pectinesterase activity(GO:0030599);biological_process:cell wall modification(GO:0042545);biological_process:negative regulation of catalytic activity(GO:0043086);molecular_function:aspartyl esterase activity(GO:0045330);cellular_component:cell wall(GO:0005618);molecular_function:enzyme inhibitor activity(GO:0004857)
TRIAE_CS42_2DS_TGACv1_178705_AA0600000	3814	262	6.28	368	7.73	359	8.29	125	2.97	158	3.65	106	2.52	224.921	-1.14206	0.156879	-7.27992	3.34e-13	8.88e-11	Down	gi|473993576|gb|EMS51970.1| Omega-hydroxypalmitate O-feruloyl transferase [Triticum urartu]	K15400	molecular_function:transferase activity, transferring acyl groups other than amino-acyl groups(GO:0016747)
TRIAE_CS42_7DL_TGACv1_604453_AA1998250	1483	44	1.22	52	1.27	48	1.29	144	3.97	129	3.46	154	4.25	95.6394	1.37581	0.188994	7.27962	3.35e-13	8.88e-11	Ups	gi|474108397|gb|EMS55521.1| hypothetical protein TRIUR3_12088 [Triticum urartu]	_	_
TRIAE_CS42_7DS_TGACv1_625241_AA2064680	5214	101	0.51	104	0.46	65	0.32	207	1.04	244	1.19	229	1.15	158.697	1.23105	0.169343	7.26958	3.61e-13	9.53e-11	Ups	gi|326489195|dbj|BAK01581.1| predicted protein, partial [Hordeum vulgare subsp. vulgare]	_	_
TRIAE_CS42_6AL_TGACv1_471762_AA1513940	3375	297	7.99	298	7.03	285	7.39	88	2.35	121	3.14	137	3.66	200.992	-1.14543	0.157816	-7.25803	3.93e-13	1.02e-10	Down	gi|326526627|dbj|BAK00702.1| predicted protein [Hordeum vulgare subsp. vulgare]	_	molecular_function:catalytic activity(GO:0003824);biological_process:metabolic process(GO:0008152)
TRIAE_CS42_3B_TGACv1_222391_AA0763730	6066	20	0.32	60	0.84	35	0.54	243	3.84	140	2.15	120	1.9	103.499	1.63703	0.225856	7.2481	4.23e-13	1.09e-10	Ups	gi|669027517|emb|CDM80943.1| unnamed protein product [Triticum aestivum]	K13436	molecular_function:polysaccharide binding(GO:0030247);biological_process:protein phosphorylation(GO:0006468);molecular_function:ATP binding(GO:0005524);molecular_function:protein serine/threonine kinase activity(GO:0004674);molecular_function:binding(GO:0005488);molecular_function:transferase activity, transferring phosphorus-containing groups(GO:0016772)
TRIAE_CS42_2AL_TGACv1_093194_AA0274710	1124	143	6.61	218	8.84	196	8.73	52	2.38	71	3.16	55	2.52	119.528	-1.33336	0.184047	-7.24465	4.34e-13	1.11e-10	Down	gi|326502614|dbj|BAJ98935.1| predicted protein [Hordeum vulgare subsp. vulgare]<>gi|326526271|dbj|BAJ97152.1| predicted protein [Hordeum vulgare subsp. vulgare]	_	cellular_component:cytoplasmic membrane-bounded vesicle(GO:0016023)
TRIAE_CS42_1BS_TGACv1_049760_AA0160980	3670	37	0.53	38	0.48	62	0.85	257	3.64	128	1.76	152	2.16	113.453	1.56643	0.216285	7.24241	4.41e-13	1.13e-10	Ups	gi|326529849|dbj|BAK08204.1| predicted protein [Hordeum vulgare subsp. vulgare]	K00253	biological_process:protein phosphorylation(GO:0006468);molecular_function:ATP binding(GO:0005524);molecular_function:protein serine/threonine kinase activity(GO:0004674)
TRIAE_CS42_1BL_TGACv1_032544_AA0131180	2837	25	0.59	41	0.85	39	0.89	198	4.67	101	2.31	122	2.88	88.3374	1.58275	0.218805	7.23364	4.7e-13	1.2e-10	Ups	gi|474405746|gb|EMS66449.1| Alcohol dehydrogenase 3 [Triticum urartu]	K18857	molecular_function:oxidoreductase activity(GO:0016491);molecular_function:nucleotide binding(GO:0000166);biological_process:oxidation-reduction process(GO:0055114);molecular_function:zinc ion binding(GO:0008270)
TRIAE_CS42_4DL_TGACv1_344693_AA1148970	2966	21	0.29	27	0.33	26	0.35	121	1.67	101	1.35	80	1.1	63.0955	1.58733	0.219736	7.22383	5.05e-13	1.28e-10	Ups	gi|475555768|gb|EMT12512.1| hypothetical protein F775_14080 [Aegilops tauschii]	_	_
TRIAE_CS42_6AL_TGACv1_473438_AA1531100	1489	43	1.38	77	2.16	59	1.82	168	5.33	162	5	167	5.3	112.845	1.32111	0.183304	7.20723	5.71e-13	1.43e-10	Ups	gi|232200|sp|P30111.1|GSTF2_WHEAT RecName: Full=Glutathione S-transferase 2; AltName: Full=GST class-phi<>gi|21790|emb|CAA39480.1| glutathione transferase [Triticum aestivum]	K00799	molecular_function:glutathione transferase activity(GO:0004364)
TRIAE_CS42_4AS_TGACv1_307488_AA1020690	1639	134	4.73	167	5.17	187	6.37	347	12.16	340	11.57	317	11.11	248.904	1.02005	0.141555	7.20602	5.76e-13	1.43e-10	Ups	gi|326518472|dbj|BAJ88265.1| predicted protein [Hordeum vulgare subsp. vulgare]<>gi|326523243|dbj|BAJ88662.1| predicted protein [Hordeum vulgare subsp. vulgare]<>gi|326523797|dbj|BAJ93069.1| predicted protein [Hordeum vulgare subsp. vulgare]<>gi|326524253|dbj|BAK00510.1| predicted protein [Hordeum vulgare subsp. vulgare]	_	_
TRIAE_CS42_2BL_TGACv1_130768_AA0417660	1485	46	1.57	57	1.7	41	1.35	165	5.57	128	4.2	139	4.7	96.4179	1.38143	0.192029	7.19383	6.3e-13	1.55e-10	Ups	gi|475497000|gb|EMT03963.1| Acyl-protein thioesterase 1 [Aegilops tauschii]	_	_
TRIAE_CS42_1BS_TGACv1_049423_AA0153150	965	185	7.91	174	6.53	238	9.81	75	3.18	58	2.39	35	1.48	125.438	-1.43816	0.200049	-7.18902	6.53e-13	1.6e-10	Down		_	_
TRIAE_CS42_2BS_TGACv1_146598_AA0469050	2664	238	3.7	309	4.22	278	4.17	100	1.54	133	1.99	101	1.56	189.303	-1.10945	0.154385	-7.18626	6.66e-13	1.63e-10	Down	gi|474363364|gb|EMS63380.1| hypothetical protein TRIUR3_15898 [Triticum urartu]	_	_
TRIAE_CS42_3B_TGACv1_223262_AA0779290	3540	166	3.14	155	2.57	189	3.44	39	0.73	66	1.2	48	0.9	108.651	-1.38899	0.19334	-7.18418	6.76e-13	1.64e-10	Down	gi|669029521|emb|CDM83756.1| unnamed protein product [Triticum aestivum]	K14611	biological_process:transmembrane transport(GO:0055085);cellular_component:integral component of membrane(GO:0016021);molecular_function:transporter activity(GO:0005215)
TRIAE_CS42_2BL_TGACv1_131434_AA0427630	6318	117	2.31	236	4.08	211	4.01	427	8.34	420	7.98	413	8.07	303.679	1.11553	0.15569	7.1651	7.77e-13	1.87e-10	Ups	gi|474176774|gb|EMS57783.1| Naringenin,2-oxoglutarate 3-dioxygenase [Triticum urartu]	_	biological_process:oxidation-reduction process(GO:0055114);molecular_function:oxidoreductase activity, acting on paired donors, with incorporation or reduction of molecular oxygen, 2-oxoglutarate as one donor, and incorporation of one atom each of oxygen into both donors(GO:0016706)
TRIAE_CS42_3DL_TGACv1_253543_AA0894910	720	70	4.01	89	4.47	84	4.64	13	0.74	20	1.1	9	0.51	46.2379	-1.68987	0.236118	-7.15686	8.25e-13	1.98e-10	Down	gi|669029801|emb|CDM84127.1| unnamed protein product [Triticum aestivum]	_	_
TRIAE_CS42_7AS_TGACv1_569425_AA1815470	935	54	2.38	73	2.83	51	2.17	4	0.18	7	0.3	9	0.39	31.9438	-1.79336	0.250652	-7.15477	8.38e-13	2e-10	Down	gi|326487560|dbj|BAK05452.1| predicted protein, partial [Hordeum vulgare subsp. vulgare]	_	_
TRIAE_CS42_7AS_TGACv1_570931_AA1842560	2726	47	1.03	57	1.1	67	1.42	168	3.65	148	3.13	161	3.5	108.511	1.31617	0.18418	7.14607	8.93e-13	2.12e-10	Ups	gi|326515172|dbj|BAK03499.1| predicted protein [Hordeum vulgare subsp. vulgare]	_	molecular_function:aspartic-type endopeptidase activity(GO:0004190);biological_process:proteolysis(GO:0006508)
TRIAE_CS42_4AS_TGACv1_307304_AA1019300	1464	89	2.77	121	3.3	109	3.27	29	0.89	27	0.81	13	0.4	62.9786	-1.5894	0.222876	-7.13134	9.94e-13	2.35e-10	Down	gi|82780750|gb|ABB90544.1| dehydration responsive element binding protein [Triticum aestivum]	K09286	biological_process:transcription, DNA-templated(GO:0006351)
TRIAE_CS42_4AS_TGACv1_307080_AA1016780	2631	204	3.87	281	4.68	232	4.25	105	1.98	92	1.68	76	1.43	161.436	-1.16717	0.163716	-7.1292	1.01e-12	2.37e-10	Down	gi|357113866|ref|XP_003558722.1| PREDICTED: cyclic dof factor 1-like [Brachypodium distachyon]<>gi|944088080|gb|KQK23432.1| hypothetical protein BRADI_1g73710 [Brachypodium distachyon]	_	molecular_function:binding(GO:0005488)
TRIAE_CS42_2AL_TGACv1_093145_AA0273240	4295	108	1.76	133	1.9	122	1.92	37	0.6	33	0.52	29	0.47	75.2663	-1.44822	0.203571	-7.11407	1.13e-12	2.63e-10	Down	gi|475539011|gb|EMT09335.1| Putative metal-nicotianamine transporter YSL6 [Aegilops tauschii]	_	biological_process:transmembrane transport(GO:0055085);cellular_component:membrane(GO:0016020)
TRIAE_CS42_5DL_TGACv1_435168_AA1446950	3317	180	3.48	176	2.98	143	2.66	43	0.82	67	1.25	41	0.79	106.193	-1.3745	0.193453	-7.10508	1.2e-12	2.79e-10	Down	gi|475526577|gb|EMT07332.1| S-adenosylmethionine decarboxylase proenzyme [Aegilops tauschii]	K01611	_
TRIAE_CS42_2BL_TGACv1_132637_AA0438740	959	151	6.5	200	7.55	254	10.53	42	1.79	80	3.32	48	2.05	126.43	-1.43013	0.201476	-7.09826	1.26e-12	2.92e-10	Down	gi|474411959|gb|EMS66894.1| IAA-amino acid hydrolase ILR1-like 5 [Triticum urartu]	_	_
TRIAE_CS42_1AL_TGACv1_003667_AA0051000	3476	173	1.79	223	2.03	187	1.87	63	0.65	84	0.84	47	0.48	126.579	-1.29157	0.182454	-7.07891	1.45e-12	3.34e-10	Down	gi|326511351|dbj|BAJ87689.1| predicted protein [Hordeum vulgare subsp. vulgare]	K15402	molecular_function:heme binding(GO:0020037);molecular_function:oxidoreductase activity, acting on paired donors, with incorporation or reduction of molecular oxygen(GO:0016705);molecular_function:monooxygenase activity(GO:0004497);molecular_function:iron ion binding(GO:0005506);molecular_function:electron carrier activity(GO:0009055);biological_process:oxidation-reduction process(GO:0055114)
TRIAE_CS42_6BL_TGACv1_499559_AA1586090	994	128	6.39	178	7.79	136	6.54	50	2.47	28	1.35	46	2.28	91.998	-1.42121	0.201319	-7.05949	1.67e-12	3.8e-10	Down	gi|326502614|dbj|BAJ98935.1| predicted protein [Hordeum vulgare subsp. vulgare]<>gi|326526271|dbj|BAJ97152.1| predicted protein [Hordeum vulgare subsp. vulgare]	_	_
TRIAE_CS42_7AS_TGACv1_571139_AA1845000	3420	34	0.41	53	0.56	38	0.44	119	1.42	120	1.4	160	1.92	87.6811	1.4206	0.201308	7.05685	1.7e-12	3.86e-10	Ups	gi|326491695|dbj|BAJ94325.1| predicted protein [Hordeum vulgare subsp. vulgare]<>gi|326530842|dbj|BAK01219.1| predicted protein [Hordeum vulgare subsp. vulgare]	_	_
TRIAE_CS42_2AL_TGACv1_093271_AA0276350	2345	320	5.87	407	6.55	429	7.59	171	3.11	195	3.45	138	2.51	271.734	-1.02855	0.146004	-7.04464	1.86e-12	4.19e-10	Down	gi|473956302|gb|EMS50926.1| hypothetical protein TRIUR3_16846 [Triticum urartu]	_	_
TRIAE_CS42_2BL_TGACv1_131230_AA0424710	1289	157	3.91	166	3.62	181	4.34	43	1.06	70	1.68	33	0.81	106.215	-1.4043	0.199469	-7.04018	1.92e-12	4.31e-10	Down	gi|326502614|dbj|BAJ98935.1| predicted protein [Hordeum vulgare subsp. vulgare]<>gi|326526271|dbj|BAJ97152.1| predicted protein [Hordeum vulgare subsp. vulgare]	_	cellular_component:cytoplasmic membrane-bounded vesicle(GO:0016023)
TRIAE_CS42_7DL_TGACv1_603811_AA1989610	1004	48	1.97	38	1.37	39	1.54	144	5.87	116	4.59	130	5.3	86.4709	1.3924	0.199112	6.99302	2.69e-12	6e-10	Ups	gi|474108397|gb|EMS55521.1| hypothetical protein TRIUR3_12088 [Triticum urartu]	_	_
TRIAE_CS42_U_TGACv1_641865_AA2106100	5576	134	1.36	162	1.44	149	1.45	331	3.32	266	2.59	311	3.12	225.749	1.0077	0.144283	6.98417	2.87e-12	6.37e-10	Ups	gi|475571995|gb|EMT16397.1| hypothetical protein F775_20633 [Aegilops tauschii]	_	_
TRIAE_CS42_5AL_TGACv1_374195_AA1193240	3376	138	1.49	184	1.74	76	0.79	31	0.33	33	0.34	18	0.19	77.4543	-1.59392	0.228395	-6.97876	2.98e-12	6.57e-10	Down	gi|474096867|gb|EMS55079.1| Beta-glucosidase 30 [Triticum urartu]	K01188	molecular_function:hydrolase activity, hydrolyzing O-glycosyl compounds(GO:0004553);cellular_component:plant-type cell wall(GO:0009505);biological_process:carbohydrate metabolic process(GO:0005975);biological_process:pollen tube growth(GO:0009860);cellular_component:mitochondrion(GO:0005739)
TRIAE_CS42_4AS_TGACv1_306183_AA1003910	2469	193	3.51	195	3.11	216	3.79	61	1.1	91	1.6	61	1.1	133.847	-1.23935	0.178019	-6.96186	3.36e-12	7.36e-10	Down	gi|475589073|gb|EMT21059.1| hypothetical protein F775_25997 [Aegilops tauschii]	_	molecular_function:catalytic activity(GO:0003824);biological_process:metabolic process(GO:0008152)
TRIAE_CS42_1AL_TGACv1_000411_AA0011470	2525	66	1.79	211	5.02	131	3.42	2925	78.63	1244	32.5	1870	50.3	1090.74	1.79249	0.258339	6.93852	3.96e-12	8.59e-10	Ups	gi|474405746|gb|EMS66449.1| Alcohol dehydrogenase 3 [Triticum urartu]	K18857	molecular_function:oxidoreductase activity(GO:0016491);molecular_function:nucleotide binding(GO:0000166);biological_process:oxidation-reduction process(GO:0055114);molecular_function:zinc ion binding(GO:0008270)
TRIAE_CS42_1BL_TGACv1_030748_AA0099740	824	84	4.21	135	5.93	135	6.52	27	1.34	25	1.21	35	1.74	71.6097	-1.49667	0.215961	-6.93029	4.2e-12	9.08e-10	Down	gi|326517473|dbj|BAK03655.1| predicted protein, partial [Hordeum vulgare subsp. vulgare]	_	biological_process:cell wall macromolecule catabolic process(GO:0016998)
TRIAE_CS42_2AS_TGACv1_112168_AA0332210	1511	48	3.69	81	5.46	84	6.22	10	0.76	14	1.04	7	0.53	39.4366	-1.70294	0.245835	-6.92715	4.29e-12	9.19e-10	Down	gi|473740384|gb|EMS45345.1| hypothetical protein TRIUR3_26519 [Triticum urartu]	_	_
TRIAE_CS42_1DL_TGACv1_062372_AA0213430	5382	67	0.79	57	0.59	44	0.5	168	1.98	137	1.57	172	2.02	108.152	1.31661	0.19019	6.92259	4.43e-12	9.43e-10	Ups	gi|475561925|gb|EMT13879.1| Putative LRR receptor-like serine/threonine-protein kinase [Aegilops tauschii]	_	cellular_component:cytoplasmic membrane-bounded vesicle(GO:0016023);molecular_function:transferase activity, transferring phosphorus-containing groups(GO:0016772)
TRIAE_CS42_7DL_TGACv1_605625_AA2007390	1195	345	11.91	381	11.54	438	14.58	181	6.2	184	6.12	113	3.87	269.215	-1.09067	0.157796	-6.91189	4.78e-12	1.01e-09	Down	gi|326507194|dbj|BAJ95674.1| predicted protein [Hordeum vulgare subsp. vulgare]<>gi|326507586|dbj|BAK03186.1| predicted protein [Hordeum vulgare subsp. vulgare]	_	_
TRIAE_CS42_3DL_TGACv1_250797_AA0873290	687	121	7.27	247	13.01	138	7.99	375	22.33	464	26.86	337	20.08	279.376	1.14856	0.167212	6.86886	6.47e-12	1.33e-09	Ups	gi|475499945|gb|EMT04222.1| hypothetical protein F775_26188 [Aegilops tauschii]	_	_
TRIAE_CS42_4DL_TGACv1_342497_AA1115230	5086	136	1.46	252	2.37	207	2.14	69	0.74	55	0.57	69	0.74	127.85	-1.29445	0.188657	-6.86141	6.82e-12	1.39e-09	Down	gi|573924876|ref|XP_006649998.1| PREDICTED: CBL-interacting protein kinase 31 [Oryza brachyantha]	K07198	biological_process:protein phosphorylation(GO:0006468);molecular_function:ATP binding(GO:0005524);biological_process:signal transduction(GO:0007165);molecular_function:protein serine/threonine kinase activity(GO:0004674);cellular_component:mitochondrion(GO:0005739)
TRIAE_CS42_1AL_TGACv1_001912_AA0036610	5013	164	1.68	182	1.64	169	1.67	421	4.29	279	2.76	389	3.96	268.023	1.04227	0.151956	6.85903	6.93e-12	1.41e-09	Ups	gi|944069514|gb|KQK04998.1| hypothetical protein BRADI_2g17260 [Brachypodium distachyon]	K03327	biological_process:cadmium ion transport(GO:0015691);biological_process:response to wounding(GO:0009611);molecular_function:drug transmembrane transporter activity(GO:0015238);cellular_component:plasma membrane(GO:0005886);biological_process:drug transmembrane transport(GO:0006855);biological_process:sequestering of metal ion(GO:0051238);cellular_component:chloroplast(GO:0009507);molecular_functi…
TRIAE_CS42_5AL_TGACv1_376779_AA1240870	1099	90	3.78	93	3.43	82	3.32	15	0.63	19	0.77	24	1	52.6525	-1.55197	0.226314	-6.85761	7e-12	1.42e-09	Down	gi|326492433|dbj|BAK02000.1| predicted protein [Hordeum vulgare subsp. vulgare]<>gi|326521590|dbj|BAK00371.1| predicted protein [Hordeum vulgare subsp. vulgare]	_	_
TRIAE_CS42_4BS_TGACv1_328538_AA1089850	3465	6	0.25	9	0.33	15	0.61	45	1.88	69	2.8	85	3.55	38.5739	1.70255	0.248852	6.84163	7.83e-12	1.59e-09	Ups	gi|475572920|gb|EMT16619.1| hypothetical protein F775_42487 [Aegilops tauschii]	_	_
TRIAE_CS42_2BS_TGACv1_146427_AA0464800	720	339	19.43	523	26.29	525	29	226	12.84	172	9.5	204	11.6	325.017	-1.02272	0.149526	-6.83976	7.93e-12	1.6e-09	Down	gi|326505272|dbj|BAK03023.1| predicted protein [Hordeum vulgare subsp. vulgare]<>gi|326531248|dbj|BAK04975.1| predicted protein [Hordeum vulgare subsp. vulgare]	_	biological_process:response to stimulus(GO:0050896);cellular_component:plastid(GO:0009536)
TRIAE_CS42_7AS_TGACv1_569190_AA1809630	1733	194	4.98	165	3.71	123	3.04	42	1.07	58	1.43	47	1.2	102.977	-1.34717	0.19861	-6.78302	1.18e-11	2.32e-09	Down	gi|326492510|dbj|BAK02038.1| predicted protein [Hordeum vulgare subsp. vulgare]	_	biological_process:lipid metabolic process(GO:0006629);molecular_function:hydrolase activity, acting on ester bonds(GO:0016788)
TRIAE_CS42_1DL_TGACv1_061054_AA0183220	1676	37	1.12	54	1.44	31	0.91	126	3.8	112	3.28	136	4.1	82.9387	1.37059	0.202173	6.77931	1.21e-11	2.37e-09	Ups	gi|475581806|gb|EMT18948.1| hypothetical protein F775_28211 [Aegilops tauschii]	_	_
TRIAE_CS42_6AL_TGACv1_472803_AA1526180	1698	134	3.7	93	2.25	106	2.82	267	7.31	231	6.15	280	7.67	186.271	1.13218	0.167058	6.77713	1.23e-11	2.39e-09	Ups	gi|326518204|dbj|BAK07354.1| predicted protein, partial [Hordeum vulgare subsp. vulgare]	_	_
TRIAE_CS42_3AL_TGACv1_195449_AA0649720	5979	81	1.3	160	2.26	104	1.61	296	4.72	261	4.05	244	3.89	190.688	1.1421	0.168535	6.77662	1.23e-11	2.39e-09	Ups	gi|669029462|emb|CDM83663.1| unnamed protein product [Triticum aestivum]	_	cellular_component:membrane(GO:0016020);molecular_function:catalytic activity(GO:0003824);biological_process:metabolic process(GO:0008152)
TRIAE_CS42_2DS_TGACv1_178537_AA0597250	1746	63	1.65	116	2.67	122	3.09	29	0.76	12	0.3	13	0.34	57.4499	-1.62019	0.239125	-6.7755	1.24e-11	2.39e-09	Down	gi|475437637|gb|EMT01352.1| Glycogenin-2 [Aegilops tauschii]	K18819	_
TRIAE_CS42_3B_TGACv1_220755_AA0718150	959	18	0.87	33	1.4	40	1.86	121	5.8	119	5.55	91	4.37	70.6842	1.47669	0.218052	6.77218	1.27e-11	2.44e-09	Ups	gi|574460989|gb|AHG29011.1| LUX-B [Triticum aestivum]	_	_
TRIAE_CS42_4DL_TGACv1_343434_AA1134330	1487	206	6.78	330	9.52	291	9.23	116	3.78	106	3.36	115	3.75	189.746	-1.08471	0.160263	-6.7683	1.3e-11	2.5e-09	Down	gi|475586856|gb|EMT20409.1| Acid phosphatase 1 [Aegilops tauschii]	_	molecular_function:acid phosphatase activity(GO:0003993)
TRIAE_CS42_7AL_TGACv1_557145_AA1777390	1766	82	1.1	92	1.09	55	0.71	237	3.16	164	2.13	198	2.64	138.477	1.24365	0.183874	6.76363	1.35e-11	2.56e-09	Ups	gi|326495972|dbj|BAJ90608.1| predicted protein [Hordeum vulgare subsp. vulgare]<>gi|326510219|dbj|BAJ87326.1| predicted protein [Hordeum vulgare subsp. vulgare]<>gi|326532716|dbj|BAJ89203.1| predicted protein [Hordeum vulgare subsp. vulgare]<>gi|326533090|dbj|BAJ93517.1| predicted protein [Hordeum vulgare subsp. vulgare]	_	_
TRIAE_CS42_7DL_TGACv1_603253_AA1979190	6171	101	3.41	94	2.79	89	2.9	18	0.6	23	0.75	27	0.91	57.5316	-1.49504	0.221659	-6.7448	1.53e-11	2.87e-09	Down	gi|326513298|dbj|BAK06889.1| predicted protein [Hordeum vulgare subsp. vulgare]	K16241	_
TRIAE_CS42_7BS_TGACv1_591815_AA1922450	979	142	6.53	168	6.77	167	7.4	41	1.87	61	2.7	60	2.74	104.402	-1.25325	0.187477	-6.68485	2.31e-11	4.19e-09	Down	gi|336245578|gb|AEI28611.1| hypothetical protein [Triticum aestivum]	_	cellular_component:membrane(GO:0016020)
TRIAE_CS42_5AS_TGACv1_394253_AA1279170	1085	182	8.63	256	10.65	252	11.52	69	3.25	100	4.57	95	4.47	155.712	-1.14602	0.171582	-6.67914	2.4e-11	4.33e-09	Down	gi|326508414|dbj|BAJ99474.1| predicted protein [Hordeum vulgare subsp. vulgare]	K17279	biological_process:response to abiotic stimulus(GO:0009628);biological_process:response to stress(GO:0006950);cellular_component:membrane(GO:0016020)
TRIAE_CS42_4DS_TGACv1_361006_AA1158440	2754	159	2.28	234	2.94	182	2.51	345	4.9	553	7.63	346	4.91	302.493	1.06132	0.159414	6.6576	2.78e-11	4.96e-09	Ups	gi|475526208|gb|EMT07274.1| Cysteine-rich receptor-like protein kinase 40 [Aegilops tauschii]	_	biological_process:protein phosphorylation(GO:0006468);molecular_function:ATP binding(GO:0005524);molecular_function:protein serine/threonine kinase activity(GO:0004674)
TRIAE_CS42_3DL_TGACv1_252394_AA0889760	2675	12	0.2	15	0.22	29	0.47	100	1.68	66	1.08	95	1.6	53.4071	1.57344	0.236858	6.64298	3.07e-11	5.42e-09	Ups	gi|669029761|emb|CDM84078.1| unnamed protein product [Triticum aestivum]	_	_
TRIAE_CS42_5BL_TGACv1_406781_AA1349760	759	4	0.22	15	0.72	19	1	64	3.45	86	4.51	63	3.4	42.1103	1.62992	0.245586	6.63688	3.2e-11	5.6e-09	Ups	gi|162319718|gb|ABX84385.1| thionin-like protein [Triticum aestivum]	_	_
TRIAE_CS42_2AL_TGACv1_095243_AA0308580	1114	142	6.46	157	6.26	172	7.54	55	2.48	59	2.59	53	2.39	104.451	-1.21413	0.183529	-6.61549	3.7e-11	6.41e-09	Down	gi|326502614|dbj|BAJ98935.1| predicted protein [Hordeum vulgare subsp. vulgare]<>gi|326526271|dbj|BAJ97152.1| predicted protein [Hordeum vulgare subsp. vulgare]	_	cellular_component:cytoplasmic membrane-bounded vesicle(GO:0016023)
TRIAE_CS42_4DS_TGACv1_361936_AA1174550	3574	390	7.25	465	7.58	449	8.04	120	2.21	237	4.24	190	3.5	302.835	-1.05703	0.159937	-6.60905	3.87e-11	6.65e-09	Down	gi|669029521|emb|CDM83756.1| unnamed protein product [Triticum aestivum]	K14611	biological_process:transmembrane transport(GO:0055085);cellular_component:integral component of membrane(GO:0016021);molecular_function:transporter activity(GO:0005215)
TRIAE_CS42_2AS_TGACv1_112654_AA0342930	3216	422	9.69	505	10.17	510	11.29	164	3.73	282	6.24	148	3.37	332.217	-1.07303	0.162366	-6.6087	3.88e-11	6.65e-09	Down	gi|473993576|gb|EMS51970.1| Omega-hydroxypalmitate O-feruloyl transferase [Triticum urartu]	K15400	molecular_function:transferase activity, transferring acyl groups other than amino-acyl groups(GO:0016747)
TRIAE_CS42_5BL_TGACv1_405200_AA1322090	894	48	2.22	111	4.49	108	4.8	263	12.04	225	10.01	214	9.8	161.651	1.242	0.188311	6.59551	4.24e-11	7.25e-09	Ups	gi|473759364|gb|EMS45790.1| hypothetical protein TRIUR3_15748 [Triticum urartu]	_	_
TRIAE_CS42_3B_TGACv1_222503_AA0766120	1063	120	2.77	215	4.35	212	4.72	365	8.35	355	7.89	445	10.19	285.267	1.04609	0.15873	6.59037	4.39e-11	7.47e-09	Ups	gi|474117271|gb|EMS55908.1| hypothetical protein TRIUR3_32635 [Triticum urartu]<>gi|475506120|gb|EMT04800.1| hypothetical protein F775_27202 [Aegilops tauschii]	_	biological_process:negative regulation of catalytic activity(GO:0043086);molecular_function:identical protein binding(GO:0042802);molecular_function:serine-type endopeptidase activity(GO:0004252)
TRIAE_CS42_1AL_TGACv1_002904_AA0046140	1495	149	2.75	162	2.62	145	2.58	45	0.82	61	1.08	54	0.99	100.71	-1.22081	0.185256	-6.58985	4.4e-11	7.48e-09	Down	gi|326488057|dbj|BAJ89867.1| predicted protein [Hordeum vulgare subsp. vulgare]<>gi|326490299|dbj|BAJ84813.1| predicted protein [Hordeum vulgare subsp. vulgare]<>gi|326499812|dbj|BAJ90741.1| predicted protein [Hordeum vulgare subsp. vulgare]	_	_
TRIAE_CS42_5BS_TGACv1_423387_AA1375670	1981	101	2.22	200	3.86	204	4.33	45	0.98	45	0.95	56	1.22	105.643	-1.36167	0.206938	-6.5801	4.7e-11	7.94e-09	Down	gi|475589947|gb|EMT21318.1| Fructose-bisphosphate aldolase, chloroplastic [Aegilops tauschii]	K01623	biological_process:glycolytic process(GO:0006096);molecular_function:fructose-bisphosphate aldolase activity(GO:0004332)
TRIAE_CS42_4DS_TGACv1_362197_AA1177680	761	245	13.29	313	14.89	388	20.28	87	4.68	135	7.05	140	7.53	214.119	-1.14461	0.174054	-6.57616	4.83e-11	8.11e-09	Down	gi|475566390|gb|EMT15019.1| hypothetical protein F775_25981 [Aegilops tauschii]	_	_
TRIAE_CS42_1BL_TGACv1_030243_AA0083510	826	121	6.05	207	9.07	238	11.46	28	1.39	40	1.93	74	3.67	115.079	-1.44891	0.220724	-6.56433	5.23e-11	8.76e-09	Down		_	_
TRIAE_CS42_2DL_TGACv1_161630_AA0559610	3988	240	4.18	371	5.67	308	5.17	157	2.71	94	1.58	116	2.01	209.643	-1.09246	0.168574	-6.48058	9.14e-11	1.47e-08	Down	gi|357163102|ref|XP_003579626.1| PREDICTED: probable metal-nicotianamine transporter YSL6 [Brachypodium distachyon]<>gi|944046651|gb|KQJ82292.1| hypothetical protein BRADI_5g08260 [Brachypodium distachyon]	_	biological_process:transmembrane transport(GO:0055085)
TRIAE_CS42_4AS_TGACv1_308266_AA1027080	4026	16	0.13	47	0.35	39	0.32	0	0	1	0.01	0	0	16.3721	-1.65244	0.255251	-6.47378	9.56e-11	1.53e-08	Down	gi|326515846|dbj|BAK07169.1| predicted protein, partial [Hordeum vulgare subsp. vulgare]	_	_
TRIAE_CS42_7BS_TGACv1_593764_AA1954280	1589	189	5.3	188	4.62	224	6.05	49	1.36	94	2.54	69	1.92	133.268	-1.21368	0.187528	-6.47201	9.67e-11	1.54e-08	Down	gi|326492510|dbj|BAK02038.1| predicted protein [Hordeum vulgare subsp. vulgare]	_	biological_process:lipid metabolic process(GO:0006629);molecular_function:hydrolase activity, acting on ester bonds(GO:0016788)
TRIAE_CS42_U_TGACv1_642568_AA2119740	6900	72	1.3	105	1.67	95	1.66	243	4.36	231	4.03	164	2.95	151.739	1.13133	0.174838	6.47071	9.75e-11	1.54e-08	Ups	gi|475547341|gb|EMT10857.1| Cysteine-rich receptor-like protein kinase 15 [Aegilops tauschii]	K04733	_
TRIAE_CS42_1BL_TGACv1_032646_AA0132320	2139	79	4.57	163	8.26	118	6.57	324	18.57	258	14.37	245	14.05	197.564	1.11877	0.173094	6.4634	1.02e-10	1.61e-08	Ups	gi|960491065|ref|XP_014750978.1| PREDICTED: coiled-coil domain-containing protein 115 isoform X2 [Brachypodium distachyon]<>gi|944047858|gb|KQJ83499.1| hypothetical protein BRADI_5g15310 [Brachypodium distachyon]	_	_
TRIAE_CS42_1BL_TGACv1_030355_AA0087860	1136	195	7.08	497	15.83	284	9.94	103	3.71	123	4.31	103	3.71	210.173	-1.23239	0.190728	-6.46149	1.04e-10	1.63e-08	Down	gi|326489408|dbj|BAJ98118.1| predicted protein [Hordeum vulgare subsp. vulgare]<>gi|326512196|dbj|BAJ96079.1| predicted protein [Hordeum vulgare subsp. vulgare]	_	_
TRIAE_CS42_7AS_TGACv1_569418_AA1815320	795	141	9.67	244	14.67	252	16.65	535	36.36	370	24.44	456	31.01	333.198	1.04465	0.161775	6.45744	1.06e-10	1.67e-08	Ups	gi|474277365|gb|EMS61130.1| hypothetical protein TRIUR3_21694 [Triticum urartu]	_	_
TRIAE_CS42_U_TGACv1_643607_AA2133470	1191	4	0.32	20	1.4	25	1.93	125	9.91	63	4.85	83	6.59	53.8385	1.59589	0.247658	6.44394	1.16e-10	1.8e-08	Ups	gi|475587303|gb|EMT20519.1| hypothetical protein F775_27861 [Aegilops tauschii]	_	_
TRIAE_CS42_2BL_TGACv1_132980_AA0440750	1023	325	13.11	317	11.21	389	15.12	105	4.2	167	6.49	166	6.64	241.386	-1.04174	0.162079	-6.42732	1.3e-10	1.99e-08	Down	gi|326511371|dbj|BAJ87699.1| predicted protein [Hordeum vulgare subsp. vulgare]	_	_
TRIAE_CS42_3B_TGACv1_220796_AA0719500	2175	167	5.2	203	5.54	123	3.69	55	1.7	64	1.92	30	0.93	104.35	-1.32125	0.205625	-6.42555	1.31e-10	2.01e-08	Down	gi|475589073|gb|EMT21059.1| hypothetical protein F775_25997 [Aegilops tauschii]	_	molecular_function:catalytic activity(GO:0003824);biological_process:metabolic process(GO:0008152)
TRIAE_CS42_2BS_TGACv1_146035_AA0453700	3575	225	4.59	249	4.45	251	4.93	86	1.74	110	2.16	118	2.39	170.34	-1.01751	0.158781	-6.40828	1.47e-10	2.24e-08	Down	gi|357121383|ref|XP_003562400.1| PREDICTED: omega-3 fatty acid desaturase, chloroplastic-like [Brachypodium distachyon]<>gi|944079126|gb|KQK14478.1| hypothetical protein BRADI_1g16580 [Brachypodium distachyon]	K10257	cellular_component:chloroplast envelope(GO:0009941);molecular_function:omega-3 fatty acid desaturase activity(GO:0042389);molecular_function:oxidoreductase activity, acting on paired donors, with oxidation of a pair of donors resulting in the reduction of molecular oxygen to two molecules of water(GO:0016717);biological_process:response to cold(GO:0009409);biological_process:unsaturated fatty aci…
TRIAE_CS42_6BS_TGACv1_513423_AA1641170	11439	199	7.78	383	13.14	331	12.48	133	5.16	112	4.22	115	4.46	206.99	-1.0993	0.171879	-6.39579	1.6e-10	2.41e-08	Down	gi|326521052|dbj|BAJ96729.1| predicted protein [Hordeum vulgare subsp. vulgare]	K16241	molecular_function:sequence-specific DNA binding transcription factor activity(GO:0003700);molecular_function:sequence-specific DNA binding(GO:0043565);biological_process:regulation of transcription, DNA-templated(GO:0006355)
TRIAE_CS42_2DS_TGACv1_177679_AA0582360	3089	71	2.02	71	1.77	56	1.54	185	5.23	140	3.84	162	4.58	114.604	1.16713	0.182754	6.38633	1.7e-10	2.55e-08	Ups	gi|326496328|dbj|BAJ94626.1| predicted protein [Hordeum vulgare subsp. vulgare]	_	molecular_function:hydrolase activity(GO:0016787);cellular_component:plastid(GO:0009536);biological_process:response to arsenic-containing substance(GO:0046685)
TRIAE_CS42_7AS_TGACv1_570286_AA1833330	1406	40	1.17	82	2.11	78	2.21	9	0.26	6	0.17	15	0.44	37.0868	-1.59238	0.250154	-6.3656	1.95e-10	2.88e-08	Down		_	_
TRIAE_CS42_1AL_TGACv1_003665_AA0050970	1025	230	10.08	255	9.8	265	11.19	87	3.78	128	5.4	110	4.78	176.217	-1.01607	0.159891	-6.35476	2.09e-10	3.07e-08	Down	gi|475613216|gb|EMT28686.1| hypothetical protein F775_09975 [Aegilops tauschii]	_	_
TRIAE_CS42_1AL_TGACv1_002245_AA0040020	2177	54	1.02	100	1.66	67	1.22	143	2.69	278	5.08	189	3.55	138.332	1.26282	0.198963	6.34701	2.2e-10	3.23e-08	Ups	gi|326528785|dbj|BAJ97414.1| predicted protein [Hordeum vulgare subsp. vulgare]	_	molecular_function:heme binding(GO:0020037);molecular_function:oxidoreductase activity, acting on paired donors, with incorporation or reduction of molecular oxygen(GO:0016705);molecular_function:monooxygenase activity(GO:0004497);molecular_function:iron ion binding(GO:0005506);molecular_function:electron carrier activity(GO:0009055);biological_process:oxidation-reduction process(GO:0055114)
TRIAE_CS42_1DS_TGACv1_080597_AA0250750	1980	31	2.05	91	5.27	52	3.31	150	9.82	193	12.28	164	10.74	113.313	1.3067	0.205979	6.34382	2.24e-10	3.28e-08	Ups	gi|475525583|gb|EMT07182.1| hypothetical protein F775_43790 [Aegilops tauschii]	_	_
TRIAE_CS42_3DL_TGACv1_249627_AA0852940	1457	64	2.05	79	2.22	49	1.51	138	4.38	154	4.75	203	6.45	114.765	1.20696	0.190401	6.33907	2.31e-10	3.38e-08	Ups	gi|475589782|gb|EMT21273.1| Peroxidase 2 [Aegilops tauschii]	K00430	molecular_function:heme binding(GO:0020037);molecular_function:metal ion binding(GO:0046872);molecular_function:peroxidase activity(GO:0004601);biological_process:oxidation-reduction process(GO:0055114);biological_process:response to oxidative stress(GO:0006979)
TRIAE_CS42_6DL_TGACv1_526347_AA1680110	2179	40	2.07	53	2.4	73	3.63	3	0.15	12	0.6	5	0.26	30.203	-1.61494	0.255221	-6.3276	2.49e-10	3.62e-08	Down	gi|357150000|ref|XP_003575305.1| PREDICTED: protein FLOWERING LOCUS T [Brachypodium distachyon]<>gi|944064635|gb|KQK00226.1| hypothetical protein BRADI_3g48036 [Brachypodium distachyon]	K16223	_
TRIAE_CS42_2BS_TGACv1_145868_AA0447700	3497	453	6.38	635	7.84	440	5.97	56	0.78	133	1.8	113	1.58	295.997	-1.524	0.24106	-6.32207	2.58e-10	3.71e-08	Down	gi|473724003|gb|EMS45005.1| putative 5'-adenylylsulfate reductase 1, chloroplastic [Triticum urartu]	K05907	biological_process:cell redox homeostasis(GO:0045454);biological_process:cysteine biosynthetic process(GO:0019344);biological_process:sulfate reduction(GO:0019419);molecular_function:phosphoadenylyl-sulfate reductase (thioredoxin) activity(GO:0004604)
TRIAE_CS42_7AL_TGACv1_557124_AA1776980	1562	112	3.69	102	2.94	114	3.62	40	1.31	30	0.95	25	0.82	69.3281	-1.34274	0.212715	-6.31236	2.75e-10	3.93e-08	Down	gi|473822282|gb|EMS47058.1| Inorganic pyrophosphatase 2 [Triticum urartu]	K13248	_
TRIAE_CS42_3B_TGACv1_223778_AA0787050	1939	44	0.62	44	0.54	37	0.5	110	1.52	111	1.5	124	1.72	78.6898	1.25237	0.199132	6.28915	3.19e-10	4.54e-08	Ups	gi|944083470|gb|KQK18822.1| hypothetical protein BRADI_1g44957, partial [Brachypodium distachyon]	K08900	molecular_function:nucleoside-triphosphatase activity(GO:0017111);molecular_function:ATP binding(GO:0005524)
TRIAE_CS42_7DL_TGACv1_602774_AA1968220	6569	103	2.97	175	4.43	135	3.76	289	8.28	324	9.02	238	6.82	210.115	1.00181	0.159464	6.28236	3.33e-10	4.69e-08	Ups	gi|475594888|gb|EMT22847.1| Cysteine-rich receptor-like protein kinase 10 [Aegilops tauschii]	_	biological_process:protein phosphorylation(GO:0006468);molecular_function:ATP binding(GO:0005524);molecular_function:protein serine/threonine kinase activity(GO:0004674)
TRIAE_CS42_3B_TGACv1_225011_AA0804070	1149	32	1.66	77	3.51	77	3.85	10	0.51	8	0.4	8	0.41	34.1189	-1.58652	0.25265	-6.27951	3.4e-10	4.76e-08	Down	gi|326495424|dbj|BAJ85808.1| predicted protein [Hordeum vulgare subsp. vulgare]	_	_
TRIAE_CS42_2BS_TGACv1_146240_AA0459970	11722	216	3.42	248	3.44	268	4.09	65	1.02	115	1.75	110	1.73	167.359	-1.09898	0.175212	-6.27229	3.56e-10	4.95e-08	Down	gi|944045968|gb|KQJ81609.1| hypothetical protein BRADI_5g01766 [Brachypodium distachyon]	_	biological_process:metabolic process(GO:0008152);molecular_function:magnesium ion binding(GO:0000287);molecular_function:terpene synthase activity(GO:0010333)
TRIAE_CS42_2DL_TGACv1_160390_AA0550040	1281	55	2.22	83	2.94	72	2.8	173	6.93	173	6.73	145	5.81	116.872	1.11923	0.17848	6.27089	3.59e-10	4.99e-08	Ups	gi|475611107|gb|EMT27977.1| hypothetical protein F775_30185 [Aegilops tauschii]	_	biological_process:metal ion transport(GO:0030001);molecular_function:metal ion binding(GO:0046872)
TRIAE_CS42_6DL_TGACv1_527542_AA1705550	2048	84	0.99	113	1.17	104	1.18	170	1.99	238	2.7	273	3.19	163.811	1.08755	0.173958	6.25183	4.06e-10	5.53e-08	Ups	gi|475588272|gb|EMT20808.1| Protein RUPTURED POLLEN GRAIN 1 [Aegilops tauschii]	K15382	cellular_component:integral component of membrane(GO:0016021);cellular_component:plasma membrane(GO:0005886);biological_process:carbohydrate transport(GO:0008643)
TRIAE_CS42_5AL_TGACv1_376779_AA1240860	833	66	3.62	89	4.28	70	3.7	16	0.87	17	0.9	19	1.03	44.9534	-1.44552	0.231987	-6.23103	4.63e-10	6.2e-08	Down	gi|76096942|gb|ABA39286.1| alpha amylase inhibitor/lipid transfer/seed storage protein [Triticum aestivum]	_	_
TRIAE_CS42_1DL_TGACv1_062032_AA0207790	1962	36	0.76	84	1.55	61	1.24	143	2.98	259	5.25	143	2.98	120.848	1.31415	0.211143	6.224	4.85e-10	6.45e-08	Ups	gi|326528785|dbj|BAJ97414.1| predicted protein [Hordeum vulgare subsp. vulgare]	_	molecular_function:heme binding(GO:0020037);molecular_function:oxidoreductase activity, acting on paired donors, with incorporation or reduction of molecular oxygen(GO:0016705);molecular_function:monooxygenase activity(GO:0004497);molecular_function:iron ion binding(GO:0005506);molecular_function:electron carrier activity(GO:0009055);biological_process:oxidation-reduction process(GO:0055114)
TRIAE_CS42_4DS_TGACv1_362776_AA1182070	1015	149	6.64	175	6.84	155	6.66	59	2.61	72	3.09	37	1.64	105.627	-1.19844	0.192719	-6.21855	5.02e-10	6.65e-08	Down	gi|960454704|ref|XP_014752042.1| PREDICTED: non-specific lipid-transfer protein 2-like isoform X2 [Brachypodium distachyon]<>gi|944078518|gb|KQK13870.1| hypothetical protein BRADI_1g13000 [Brachypodium distachyon]	_	_
TRIAE_CS42_1AL_TGACv1_003121_AA0047940	4058	375	6.52	315	4.81	335	5.62	148	2.55	91	1.53	175	3.02	236.853	-1.08023	0.173915	-6.21126	5.26e-10	6.94e-08	Down	gi|475582089|gb|EMT19033.1| Subtilisin-like protease [Aegilops tauschii]	_	biological_process:negative regulation of catalytic activity(GO:0043086);biological_process:proteolysis(GO:0006508);molecular_function:identical protein binding(GO:0042802);molecular_function:serine-type endopeptidase activity(GO:0004252)
TRIAE_CS42_7AS_TGACv1_570448_AA1835810	1632	41	1.09	97	2.26	53	1.36	12	0.32	11	0.28	5	0.13	34.9845	-1.5622	0.252061	-6.19771	5.73e-10	7.46e-08	Down	gi|473967921|gb|EMS51298.1| putative O-methyltransferase 2 [Triticum urartu]	_	molecular_function:O-methyltransferase activity(GO:0008171);molecular_function:protein dimerization activity(GO:0046983);biological_process:methylation(GO:0032259)
TRIAE_CS42_1DL_TGACv1_063924_AA0231770	1615	118	3.02	128	2.87	125	3.08	341	8.64	218	5.37	239	6.06	195.361	1.03574	0.167171	6.19571	5.8e-10	7.54e-08	Ups	gi|326507492|dbj|BAK03139.1| predicted protein [Hordeum vulgare subsp. vulgare]	K09287	biological_process:transcription, DNA-templated(GO:0006351)
TRIAE_CS42_7DL_TGACv1_603733_AA1988070	1403	77	2.26	195	5.03	111	3.15	369	10.76	258	7.31	302	8.81	218.252	1.15889	0.187163	6.19188	5.94e-10	7.68e-08	Ups	gi|475596224|gb|EMT23306.1| Chitinase 1 [Aegilops tauschii]	_	biological_process:carbohydrate metabolic process(GO:0005975);molecular_function:hydrolase activity, hydrolyzing O-glycosyl compounds(GO:0004553)
TRIAE_CS42_U_TGACv1_642514_AA2118760	719	36	2.38	45	2.61	29	1.85	155	10.18	70	4.47	163	10.71	83.6472	1.39723	0.226366	6.17246	6.72e-10	8.63e-08	Ups		_	_
TRIAE_CS42_5BL_TGACv1_408930_AA1364870	2738	77	1.74	92	1.82	65	1.41	16	0.36	16	0.35	23	0.52	46.9648	-1.4306	0.231904	-6.16892	6.88e-10	8.81e-08	Down	gi|475548218|gb|EMT11028.1| hypothetical protein F775_20874 [Aegilops tauschii]	_	_
TRIAE_CS42_4BL_TGACv1_320780_AA1048570	3345	313	4.39	371	4.57	301	4.07	115	1.6	189	2.56	85	1.18	224.329	-1.09592	0.177773	-6.16473	7.06e-10	9.01e-08	Down	gi|473788023|gb|EMS46278.1| ABC transporter G family member 16 [Triticum urartu]	K16907	cellular_component:integral component of membrane(GO:0016021);biological_process:vacuolar transport(GO:0007034);;molecular_function:ATP binding(GO:0005524);cellular_component:vacuolar lumen(GO:0005775);molecular_function:ATPase activity(GO:0016887);biological_process:response to nematode(GO:0009624);cellular_component:plasma membrane(GO:0005886)
TRIAE_CS42_6DL_TGACv1_527081_AA1698210	1004	134	4.21	191	5.26	148	4.48	38	1.18	60	1.82	67	2.09	103.832	-1.19509	0.193929	-6.16252	7.16e-10	9.11e-08	Down	gi|326502614|dbj|BAJ98935.1| predicted protein [Hordeum vulgare subsp. vulgare]<>gi|326526271|dbj|BAJ97152.1| predicted protein [Hordeum vulgare subsp. vulgare]	_	_
TRIAE_CS42_5BL_TGACv1_404127_AA1285460	12216	208	1.2	362	1.84	327	1.82	114	0.65	129	0.72	140	0.8	208.599	-1.0156	0.164822	-6.16183	7.19e-10	9.12e-08	Down	gi|721674477|ref|XP_010237324.1| PREDICTED: DNA-binding protein SMUBP-2-like isoform X1 [Brachypodium distachyon]<>gi|944051307|gb|KQJ86945.1| hypothetical protein BRADI_4g08630 [Brachypodium distachyon]	_	cellular_component:chloroplast envelope(GO:0009941);molecular_function:ATP binding(GO:0005524);molecular_function:nucleoside-triphosphatase activity(GO:0017111)
TRIAE_CS42_2AS_TGACv1_112635_AA0342640	1505	192	4.52	257	5.3	282	6.39	92	2.15	107	2.43	114	2.66	170.883	-1.01792	0.165374	-6.15523	7.5e-10	9.45e-08	Down	gi|475591673|gb|EMT21846.1| Ribulose bisphosphate carboxylase small chain PW9, chloroplastic [Aegilops tauschii]<>gi|961373913|gb|ALS03823.1| chloroplast ribulose-1,5-bisphosphate carboxylase/oxygenase small subunit [Triticum aestivum]	K01602	molecular_function:ribulose-bisphosphate carboxylase activity(GO:0016984);molecular_function:monooxygenase activity(GO:0004497);biological_process:photorespiration(GO:0009853);biological_process:oxidation-reduction process(GO:0055114);cellular_component:chloroplast(GO:0009507);biological_process:photosynthesis(GO:0015979);biological_process:carbon fixation(GO:0015977)
TRIAE_CS42_2DL_TGACv1_162100_AA0561820	979	150	6.65	165	6.41	193	8.24	48	2.11	82	3.5	50	2.2	112.623	-1.18898	0.193208	-6.1539	7.56e-10	9.52e-08	Down	gi|474411959|gb|EMS66894.1| IAA-amino acid hydrolase ILR1-like 5 [Triticum urartu]	_	_
TRIAE_CS42_1AL_TGACv1_002098_AA0038710	3930	15	0.42	18	0.45	26	0.71	59	1.65	104	2.83	76	2.13	49.968	1.44896	0.235553	6.15131	7.68e-10	9.65e-08	Ups	gi|669029473|emb|CDM83680.1| unnamed protein product [Triticum aestivum]	_	_
TRIAE_CS42_2AS_TGACv1_113088_AA0351050	2034	59	1.8	94	2.51	53	1.55	149	4.5	186	5.45	160	4.83	116.681	1.13964	0.185322	6.14953	7.77e-10	9.72e-08	Ups	gi|473960762|gb|EMS51084.1| Peroxidase 2 [Triticum urartu]	K00430	molecular_function:heme binding(GO:0020037);molecular_function:metal ion binding(GO:0046872);molecular_function:peroxidase activity(GO:0004601);biological_process:oxidation-reduction process(GO:0055114);biological_process:response to oxidative stress(GO:0006979)
TRIAE_CS42_3B_TGACv1_226101_AA0813920	7497	83	1.05	119	1.32	85	1.04	272	3.42	258	3.16	154	1.94	161.79	1.13046	0.183964	6.14501	8e-10	9.95e-08	Ups	gi|669030739|emb|CDM85379.1| unnamed protein product [Triticum aestivum]	_	_
TRIAE_CS42_5BS_TGACv1_423213_AA1370890	656	34	2.59	76	5.07	76	5.58	261	19.7	130	9.54	176	13.29	126.046	1.31424	0.21426	6.13389	8.58e-10	1.06e-07	Ups	gi|465482|sp|Q01482.1|WIR1A_WHEAT RecName: Full=Protein WIR1A<>gi|170797|gb|AAA34311.1| WIR1A [Triticum aestivum]<>gi|335335189|gb|AEH40970.1| WIR1a [Triticum aestivum]	_	cellular_component:integral component of membrane(GO:0016021)
TRIAE_CS42_4BS_TGACv1_328896_AA1095180	3700	48	0.67	76	0.93	69	0.93	178	2.47	324	4.37	115	1.6	135.066	1.33769	0.218108	6.13318	8.61e-10	1.06e-07	Ups	gi|357157121|ref|XP_003577692.1| PREDICTED: cysteine-rich receptor-like protein kinase 25 [Brachypodium distachyon]<>gi|721677824|ref|XP_010237822.1| PREDICTED: cysteine-rich receptor-like protein kinase 25 [Brachypodium distachyon]<>gi|944053261|gb|KQJ88899.1| hypothetical protein BRADI_4g21990 [Brachypodium distachyon]<>gi|944053262|gb|KQJ88900.1| hypothetical protein BRADI_4g21990 [Brachypodiu…	K04733	biological_process:protein phosphorylation(GO:0006468);molecular_function:ATP binding(GO:0005524);molecular_function:protein serine/threonine kinase activity(GO:0004674)
TRIAE_CS42_1DL_TGACv1_062272_AA0211690	7812	72	0.34	91	0.38	78	0.35	189	0.88	155	0.7	182	0.85	128.009	1.04819	0.171461	6.11328	9.76e-10	1.18e-07	Ups	gi|475440162|gb|EMT01418.1| hypothetical protein F775_07818 [Aegilops tauschii]	_	_
TRIAE_CS42_7BL_TGACv1_580063_AA1911840	1871	134	3.57	306	7.16	270	6.94	83	2.2	79	2.03	86	2.28	155.308	-1.18639	0.194171	-6.11	9.96e-10	1.2e-07	Down	gi|475535512|gb|EMT08759.1| O-methyltransferase ZRP4 [Aegilops tauschii]	_	molecular_function:O-methyltransferase activity(GO:0008171);molecular_function:protein dimerization activity(GO:0046983);biological_process:methylation(GO:0032259)
TRIAE_CS42_4DS_TGACv1_361658_AA1171140	1585	126	3.64	135	3.42	128	3.56	43	1.23	53	1.47	43	1.23	86.385	-1.17646	0.192857	-6.10018	1.06e-09	1.27e-07	Down	gi|475536267|gb|EMT08890.1| Metacaspase-1 [Aegilops tauschii]	_	molecular_function:cysteine-type endopeptidase activity(GO:0004197);biological_process:proteolysis(GO:0006508)
TRIAE_CS42_2DS_TGACv1_177249_AA0570400	1106	32	1.19	94	3.08	45	1.62	173	6.4	152	5.46	162	6	109.51	1.27211	0.208838	6.09138	1.12e-09	1.33e-07	Ups	gi|475583616|gb|EMT19517.1| hypothetical protein F775_19882 [Aegilops tauschii]	K00799	_
TRIAE_CS42_4DS_TGACv1_361520_AA1169560	1054	69	3.29	76	3.18	62	2.85	17	0.8	18	0.83	5	0.24	40.1454	-1.48763	0.244321	-6.08882	1.14e-09	1.35e-07	Down	gi|475554101|gb|EMT12158.1| hypothetical protein F775_16170 [Aegilops tauschii]	_	_
TRIAE_CS42_7BL_TGACv1_577696_AA1881350	1268	10	0.4	4	0.14	12	0.46	61	2.4	47	1.79	46	1.81	30.4068	1.52239	0.252368	6.0324	1.62e-09	1.86e-07	Ups		_	_
TRIAE_CS42_4AL_TGACv1_288715_AA0956250	5609	61	1.33	40	0.77	75	1.58	162	3.51	180	3.79	132	2.86	109.053	1.20806	0.200399	6.02827	1.66e-09	1.91e-07	Ups	gi|960485796|ref|XP_014757979.1| PREDICTED: protein ZINC INDUCED FACILITATOR-LIKE 1-like [Brachypodium distachyon]	_	biological_process:transmembrane transport(GO:0055085);cellular_component:integral component of membrane(GO:0016021)
TRIAE_CS42_3DL_TGACv1_250526_AA0869710	6675	59	0.64	76	0.72	108	1.13	243	2.61	192	2	164	1.76	140.845	1.14656	0.190382	6.02243	1.72e-09	1.96e-07	Ups	gi|326496619|dbj|BAJ98336.1| predicted protein, partial [Hordeum vulgare subsp. vulgare]	_	biological_process:protein phosphorylation(GO:0006468);molecular_function:ATP binding(GO:0005524);molecular_function:protein serine/threonine kinase activity(GO:0004674)
TRIAE_CS42_3DL_TGACv1_249200_AA0841010	4746	44	0.56	62	0.7	57	0.7	197	2.5	136	1.68	109	1.38	101.145	1.22189	0.20311	6.01589	1.79e-09	2.03e-07	Ups	gi|475618691|gb|EMT30505.1| Putative cysteine-rich receptor-like protein kinase 30 [Aegilops tauschii]	K17302	_
TRIAE_CS42_6AL_TGACv1_474694_AA1535750	2139	73	3.86	58	2.69	83	4.23	7	0.37	20	1.02	16	0.84	42.1349	-1.46571	0.243994	-6.00715	1.89e-09	2.12e-07	Down	gi|475608843|gb|EMT27170.1| hypothetical protein F775_12355 [Aegilops tauschii]	K16223	_
TRIAE_CS42_1BL_TGACv1_031417_AA0113610	2059	188	3.27	232	3.54	204	3.42	62	1.07	92	1.54	104	1.8	144.205	-1.04366	0.174147	-5.99297	2.06e-09	2.29e-07	Down	gi|474072183|gb|EMS54387.1| hypothetical protein TRIUR3_12933 [Triticum urartu]	_	_
TRIAE_CS42_4DS_TGACv1_361029_AA1159200	5954	201	2.32	297	3	273	3.03	115	1.31	80	0.89	128	1.46	178.7	-1.02781	0.171541	-5.99166	2.08e-09	2.31e-07	Down	gi|474381942|gb|EMS64651.1| Receptor-like protein kinase HSL1 [Triticum urartu]	_	biological_process:protein phosphorylation(GO:0006468);molecular_function:ATP binding(GO:0005524);molecular_function:protein serine/threonine kinase activity(GO:0004674)
TRIAE_CS42_3AS_TGACv1_211037_AA0683620	1255	185	6.56	276	8.58	228	7.79	94	3.3	71	2.43	117	4.12	158.41	-1.04749	0.175422	-5.97125	2.35e-09	2.58e-07	Down	gi|669028336|emb|CDM82102.1| unnamed protein product [Triticum aestivum]	K01183	molecular_function:chitinase activity(GO:0004568);biological_process:chitin catabolic process(GO:0006032);cellular_component:cell wall(GO:0005618);biological_process:polysaccharide catabolic process(GO:0000272);biological_process:cell wall macromolecule catabolic process(GO:0016998)
TRIAE_CS42_6AS_TGACv1_485665_AA1549740	1447	16	0.46	20	0.5	27	0.74	120	3.39	55	1.51	80	2.26	53.5166	1.42308	0.238735	5.96092	2.51e-09	2.73e-07	Ups	gi|1002239762|ref|XP_015624122.1| PREDICTED: F-box/kelch-repeat protein At1g80440 [Oryza sativa Japonica Group]<>gi|49387897|dbj|BAD25000.1| kelch repeat-containing F-box-like [Oryza sativa Japonica Group]<>gi|49387909|dbj|BAD25009.1| kelch repeat-containing F-box-like [Oryza sativa Japonica Group]	_	_
TRIAE_CS42_3AL_TGACv1_196185_AA0657960	2203	67	1.26	107	1.76	79	1.43	184	3.42	193	3.48	164	3.05	132.121	1.02434	0.172157	5.95001	2.68e-09	2.89e-07	Ups	gi|326490682|dbj|BAJ90008.1| predicted protein [Hordeum vulgare subsp. vulgare]	_	_
TRIAE_CS42_3DL_TGACv1_249611_AA0852400	1348	41	1.73	68	2.51	66	2.68	9	0.38	10	0.41	13	0.54	33.5058	-1.47442	0.247823	-5.94947	2.69e-09	2.9e-07	Down	gi|326495424|dbj|BAJ85808.1| predicted protein [Hordeum vulgare subsp. vulgare]	_	_
TRIAE_CS42_3DL_TGACv1_249314_AA0845040	1570	77	2.02	97	2.24	104	2.63	17	0.44	22	0.56	35	0.91	57.4016	-1.34785	0.226595	-5.94828	2.71e-09	2.91e-07	Down	gi|669030639|emb|CDM85231.1| unnamed protein product [Triticum aestivum]	_	_
TRIAE_CS42_4DL_TGACv1_344177_AA1144620	1191	52	2.04	74	2.54	72	2.72	11	0.43	20	0.76	10	0.39	38.7699	-1.44316	0.242787	-5.94412	2.78e-09	2.98e-07	Down	gi|70797539|gb|AAZ08560.1| DRE binding factor [Triticum aestivum]	K09286	molecular_function:sequence-specific DNA binding transcription factor activity(GO:0003700);molecular_function:DNA binding(GO:0003677);cellular_component:nucleus(GO:0005634);biological_process:regulation of transcription, DNA-templated(GO:0006355)
TRIAE_CS42_5DL_TGACv1_433753_AA1421230	916	102	4.6	154	6.08	161	6.99	51	2.28	53	2.3	41	1.83	91.6195	-1.18371	0.199195	-5.94247	2.81e-09	3e-07	Down	gi|404415312|gb|AFR67795.1| AP2 domain CBF protein [Triticum aestivum]<>gi|475623973|gb|EMT32428.1| Dehydration-responsive element-binding protein 1B [Aegilops tauschii]	K09286	molecular_function:sequence-specific DNA binding transcription factor activity(GO:0003700);molecular_function:DNA binding(GO:0003677);cellular_component:nucleus(GO:0005634);biological_process:regulation of transcription, DNA-templated(GO:0006355)
TRIAE_CS42_5BL_TGACv1_404184_AA1288870	1272	167	6.93	113	4.11	88	3.52	33	1.36	45	1.8	23	0.95	77.0067	-1.33529	0.22562	-5.91829	3.25e-09	3.46e-07	Down	gi|475490060|gb|EMT03473.1| hypothetical protein F775_02622 [Aegilops tauschii]	_	_
TRIAE_CS42_7BS_TGACv1_592007_AA1927880	8318	29	0.4	24	0.29	46	0.61	0	0	0	0	4	0.05	16.8391	-1.51573	0.256129	-5.91783	3.26e-09	3.46e-07	Down	gi|669031122|emb|CDM85900.1| unnamed protein product [Triticum aestivum]	_	_
TRIAE_CS42_2BS_TGACv1_147844_AA0488140	1796	63	1.45	107	2.16	91	2.01	26	0.59	21	0.46	4	0.09	50.4187	-1.45286	0.246105	-5.90341	3.56e-09	3.74e-07	Down	gi|326513755|dbj|BAJ87896.1| predicted protein [Hordeum vulgare subsp. vulgare]	_	molecular_function:aspartic-type endopeptidase activity(GO:0004190);biological_process:proteolysis(GO:0006508)
TRIAE_CS42_1BS_TGACv1_049483_AA0154580	5426	29	0.43	68	0.88	41	0.58	149	2.18	154	2.19	96	1.4	89.4183	1.25922	0.213644	5.89402	3.77e-09	3.92e-07	Ups	gi|475462097|gb|EMT02082.1| hypothetical protein F775_03798 [Aegilops tauschii]	_	_
TRIAE_CS42_4AL_TGACv1_290824_AA0989770	1580	4	0.17	21	0.78	11	0.45	48	2	60	2.43	75	3.13	36.6589	1.47215	0.250509	5.87665	4.19e-09	4.31e-07	Ups	gi|475572920|gb|EMT16619.1| hypothetical protein F775_42487 [Aegilops tauschii]	_	_
TRIAE_CS42_6AS_TGACv1_487896_AA1573490	3535	196	0.97	331	1.44	254	1.21	75	0.37	134	0.64	109	0.54	178.704	-1.04747	0.178403	-5.87136	4.32e-09	4.42e-07	Down	gi|326491505|dbj|BAJ94230.1| predicted protein [Hordeum vulgare subsp. vulgare]<>gi|326512118|dbj|BAJ96040.1| predicted protein [Hordeum vulgare subsp. vulgare]	K01193	molecular_function:sucrose alpha-glucosidase activity(GO:0004575);biological_process:carbohydrate metabolic process(GO:0005975)
TRIAE_CS42_1BL_TGACv1_030693_AA0098040	5365	218	3.23	186	2.42	119	1.7	441	6.49	303	4.33	361	5.31	272.173	1.00284	0.171536	5.8462	5.03e-09	5.05e-07	Ups	gi|475561925|gb|EMT13879.1| Putative LRR receptor-like serine/threonine-protein kinase [Aegilops tauschii]	_	molecular_function:transferase activity, transferring phosphorus-containing groups(GO:0016772)
TRIAE_CS42_1DS_TGACv1_080282_AA0245040	2374	60	1.04	104	1.59	95	1.59	173	2.98	246	4.12	169	2.91	140.956	1.07122	0.18351	5.83738	5.3e-09	5.29e-07	Ups	gi|475583306|gb|EMT19416.1| Lectin-domain containing receptor kinase A4.2 [Aegilops tauschii]	_	_
TRIAE_CS42_3B_TGACv1_222900_AA0772930	4223	55	0.81	91	1.17	74	1.05	133	1.94	224	3.17	168	2.45	124.014	1.11294	0.190725	5.83532	5.37e-09	5.35e-07	Ups	gi|669030114|emb|CDM84531.1| unnamed protein product [Triticum aestivum]	_	molecular_function:metal ion binding(GO:0046872);molecular_function:nucleoside-triphosphatase activity(GO:0017111);biological_process:protein metabolic process(GO:0019538);molecular_function:ATP binding(GO:0005524);molecular_function:DNA binding(GO:0003677);cellular_component:chloroplast envelope(GO:0009941);cellular_component:apoplast(GO:0048046);molecular_function:translation elongation factor …
TRIAE_CS42_7AS_TGACv1_569592_AA1819900	3156	85	2.58	80	2.13	87	2.55	22	0.66	13	0.38	30	0.9	51.9091	-1.34927	0.231234	-5.83509	5.38e-09	5.35e-07	Down		_	_
TRIAE_CS42_6AL_TGACv1_472672_AA1524690	1659	33	0.65	46	0.79	24	0.45	98	1.9	92	1.73	105	2.04	66.4892	1.24316	0.213419	5.825	5.71e-09	5.67e-07	Ups	gi|721668437|ref|XP_010236094.1| PREDICTED: F-box protein FBW2-like isoform X1 [Brachypodium distachyon]<>gi|944066226|gb|KQK01817.1| hypothetical protein BRADI_3g58610 [Brachypodium distachyon]<>gi|944066227|gb|KQK01818.1| hypothetical protein BRADI_3g58610 [Brachypodium distachyon]<>gi|944066228|gb|KQK01819.1| hypothetical protein BRADI_3g58610 [Brachypodium distachyon]	_	biological_process:posttranscriptional regulation of gene expression(GO:0010608)
TRIAE_CS42_4AL_TGACv1_288598_AA0953360	1095	78	3.23	75	2.72	75	2.99	173	7.1	156	6.22	157	6.45	119.315	1.00922	0.17328	5.82422	5.74e-09	5.68e-07	Ups	gi|1002848216|ref|XP_015690588.1| PREDICTED: uncharacterized protein LOC102710862 [Oryza brachyantha]	_	_
TRIAE_CS42_3AL_TGACv1_195726_AA0653170	2040	138	1.98	109	1.37	134	1.86	36	0.51	26	0.36	56	0.8	82.0724	-1.2561	0.215756	-5.82183	5.82e-09	5.75e-07	Down	gi|669029466|emb|CDM83669.1| unnamed protein product [Triticum aestivum]	_	molecular_function:zinc ion binding(GO:0008270)
TRIAE_CS42_2BS_TGACv1_147022_AA0476710	1485	16	0.5	82	2.26	65	1.97	4	0.12	8	0.24	1	0.03	27.924	-1.50259	0.258143	-5.82078	5.86e-09	5.78e-07	Down	gi|475437637|gb|EMT01352.1| Glycogenin-2 [Aegilops tauschii]	K18819	molecular_function:transferase activity, transferring glycosyl groups(GO:0016757)
TRIAE_CS42_2AL_TGACv1_095372_AA0310150	1150	5	0.21	9	0.33	17	0.69	59	2.48	57	2.32	45	1.89	32.2853	1.45999	0.251014	5.81636	6.01e-09	5.91e-07	Ups	gi|473787864|gb|EMS46277.1| hypothetical protein TRIUR3_33255 [Triticum urartu]	_	_
TRIAE_CS42_2AS_TGACv1_112861_AA0346250	2639	24	0.31	63	0.71	40	0.5	125	1.6	204	2.54	89	1.14	90.7077	1.32215	0.227455	5.81278	6.14e-09	6.02e-07	Ups	gi|474413148|gb|EMS66971.1| Sugar carrier protein C [Triticum urartu]	_	biological_process:response to nematode(GO:0009624);cellular_component:vacuole(GO:0005773);biological_process:monosaccharide transport(GO:0015749);cellular_component:plasma membrane(GO:0005886);molecular_function:monosaccharide transmembrane transporter activity(GO:0015145);biological_process:transmembrane transport(GO:0055085);molecular_function:sucrose:proton symporter activity(GO:0008506);cell…
TRIAE_CS42_5AS_TGACv1_394239_AA1279100	1882	86	3.56	92	3.34	70	2.79	29	1.19	21	0.84	17	0.7	51.357	-1.32385	0.227778	-5.81203	6.17e-09	6.04e-07	Down	gi|1029108122|ref|XP_016715663.1| PREDICTED: MADS-box transcription factor 23-like isoform X1 [Gossypium hirsutum]	_	_
TRIAE_CS42_2DS_TGACv1_179919_AA0609620	2000	130	2.68	134	2.42	115	2.29	49	1	53	1.05	29	0.59	83.3935	-1.17937	0.203664	-5.79078	7.01e-09	6.78e-07	Down	gi|326513946|dbj|BAJ92123.1| predicted protein [Hordeum vulgare subsp. vulgare]<>gi|326522945|dbj|BAJ88518.1| predicted protein [Hordeum vulgare subsp. vulgare]	_	_
TRIAE_CS42_3B_TGACv1_222263_AA0760760	1727	119	2.84	151	3.16	120	2.76	253	5.99	473	10.89	208	4.93	220.378	1.1097	0.191635	5.79071	7.01e-09	6.78e-07	Ups	gi|669028126|emb|CDM81811.1| unnamed protein product [Triticum aestivum]<>gi|669028176|emb|CDM81883.1| unnamed protein product [Triticum aestivum]	_	molecular_function:transferase activity, transferring acyl groups other than amino-acyl groups(GO:0016747)
TRIAE_CS42_6DL_TGACv1_528094_AA1711450	9067	46	1.48	64	1.81	59	1.83	126	4.03	124	3.86	146	4.67	94.321	1.09373	0.18907	5.78479	7.26e-09	6.98e-07	Ups	gi|326519835|dbj|BAK00290.1| predicted protein [Hordeum vulgare subsp. vulgare]	K05953	molecular_function:transferase activity(GO:0016740)
TRIAE_CS42_5DL_TGACv1_434788_AA1441600	789	152	3.14	204	3.69	293	5.83	62	1.27	102	2.03	70	1.43	144.509	-1.14945	0.199006	-5.77596	7.65e-09	7.32e-07	Down		_	_
TRIAE_CS42_5DL_TGACv1_433530_AA1415640	2395	17	0.42	26	0.56	28	0.67	107	2.62	75	1.78	63	1.54	52.9622	1.33127	0.231393	5.75326	8.75e-09	8.3e-07	Ups	gi|992277629|gb|KXG36042.1| hypothetical protein SORBI_002G271200 [Sorghum bicolor]	K01784	biological_process:pollen development(GO:0009555);biological_process:galactose biosynthetic process(GO:0046369);cellular_component:plasma membrane(GO:0005886);molecular_function:protein dimerization activity(GO:0046983);biological_process:response to stress(GO:0006950);biological_process:cellular metabolic process(GO:0044237);molecular_function:UDP-glucose 4-epimerase activity(GO:0003978);molecul…
TRIAE_CS42_3B_TGACv1_224247_AA0794240	3617	126	2.7	152	2.86	184	3.8	68	1.44	57	1.18	52	1.11	104.679	-1.09862	0.190972	-5.75278	8.78e-09	8.31e-07	Down	gi|669029204|emb|CDM83337.1| unnamed protein product [Triticum aestivum]	K13508	biological_process:metabolic process(GO:0008152);molecular_function:transferase activity, transferring acyl groups(GO:0016746)
TRIAE_CS42_5BL_TGACv1_404971_AA1316640	839	120	5.9	91	3.93	77	3.65	15	0.73	38	1.8	21	1.02	59.302	-1.34241	0.233657	-5.7452	9.18e-09	8.67e-07	Down	gi|475505580|gb|EMT04740.1| Non-specific lipid-transfer protein-like protein [Aegilops tauschii]	_	_
TRIAE_CS42_4BS_TGACv1_328647_AA1091680	867	139	6.62	138	5.76	148	6.79	26	1.23	62	2.84	55	2.6	93.0196	-1.196	0.208199	-5.74449	9.22e-09	8.67e-07	Down	gi|473930708|gb|EMS49995.1| hypothetical protein TRIUR3_07271 [Triticum urartu]	_	_
TRIAE_CS42_3B_TGACv1_222967_AA0774260	2338	83	1.47	152	2.35	89	1.51	25	0.44	30	0.51	40	0.7	67.6913	-1.26892	0.221127	-5.73845	9.55e-09	8.95e-07	Down	gi|669028336|emb|CDM82102.1| unnamed protein product [Triticum aestivum]	K01183	molecular_function:chitinase activity(GO:0004568);biological_process:carbohydrate metabolic process(GO:0005975);biological_process:chitin catabolic process(GO:0006032);biological_process:cell wall macromolecule catabolic process(GO:0016998);cellular_component:cell wall(GO:0005618);biological_process:polysaccharide catabolic process(GO:0000272)
TRIAE_CS42_7AL_TGACv1_557511_AA1782360	1430	4	0.12	6	0.15	4	0.11	49	1.4	27	0.75	35	1	21.0889	1.47939	0.25798	5.73451	9.78e-09	9.14e-07	Ups	gi|474108397|gb|EMS55521.1| hypothetical protein TRIUR3_12088 [Triticum urartu]	_	_
TRIAE_CS42_1DL_TGACv1_061962_AA0206540	1376	207	6.79	222	6.39	152	4.81	66	2.15	74	2.34	98	3.19	133.984	-1.03814	0.181606	-5.71643	1.09e-08	1e-06	Down	gi|475443526|gb|EMT01505.1| hypothetical protein F775_08665 [Aegilops tauschii]	_	cellular_component:extracellular region(GO:0005576);biological_process:plant-type cell wall organization(GO:0009664);cellular_component:membrane(GO:0016020)
TRIAE_CS42_4DS_TGACv1_361560_AA1170120	1190	156	5.41	177	5.38	228	7.62	87	2.99	79	2.64	59	2.03	128.933	-1.0601	0.185538	-5.71363	1.11e-08	1.02e-06	Down	gi|121129|sp|P15290.1|GER2_WHEAT RecName: Full=Oxalate oxidase GF-2.8; AltName: Full=Germin GF-2.8; Flags: Precursor<>gi|170694|gb|AAA34268.1| germin protein precursor [Triticum aestivum]<>gi|170698|gb|AAA34270.1| germin [Triticum aestivum]	_	molecular_function:oxalate oxidase activity(GO:0050162);cellular_component:cytoplasm(GO:0005737);cellular_component:apoplast(GO:0048046);biological_process:response to stress(GO:0006950);cellular_component:cell wall(GO:0005618);molecular_function:nutrient reservoir activity(GO:0045735);molecular_function:manganese ion binding(GO:0030145);biological_process:oxidation-reduction process(GO:0055114)
TRIAE_CS42_4AS_TGACv1_306678_AA1011970	2136	43	0.95	51	0.99	64	1.36	7	0.15	10	0.21	12	0.26	30.4689	-1.43009	0.250385	-5.71154	1.12e-08	1.03e-06	Down	gi|119745|sp|P09195.1|F16P1_WHEAT RecName: Full=Fructose-1,6-bisphosphatase, chloroplastic; Short=FBPase; AltName: Full=D-fructose-1,6-bisphosphate 1-phosphohydrolase; Flags: Precursor<>gi|21737|emb|CAA30612.1| unnamed protein product [Triticum aestivum]<>gi|21741|emb|CAA37908.1| fructose-bisphosphatase [Triticum aestivum]	K03841	biological_process:reductive pentose-phosphate cycle(GO:0019253);molecular_function:metal ion binding(GO:0046872);molecular_function:fructose 1,6-bisphosphate 1-phosphatase activity(GO:0042132);cellular_component:chloroplast(GO:0009507)
TRIAE_CS42_1DL_TGACv1_062452_AA0214710	2163	174	4.99	166	4.17	170	4.69	63	1.79	59	1.63	87	2.47	118.096	-1.04065	0.182359	-5.70662	1.15e-08	1.05e-06	Down	gi|326493760|dbj|BAJ85342.1| predicted protein [Hordeum vulgare subsp. vulgare]	K05894	molecular_function:oxidoreductase activity(GO:0016491);biological_process:oxidation-reduction process(GO:0055114);molecular_function:FMN binding(GO:0010181)
TRIAE_CS42_5BL_TGACv1_405222_AA1322440	786	32	1.68	47	2.16	60	3.04	1	0.05	6	0.3	10	0.52	25.2992	-1.47034	0.257664	-5.70642	1.15e-08	1.05e-06	Down	gi|1031136271|emb|SAU93244.1| Uncharacterised protein [Klebsiella pneumoniae]	_	_
TRIAE_CS42_U_TGACv1_644421_AA2139420	2005	8	0.16	2	0.04	3	0.06	21	0.43	41	0.81	66	1.35	23.8658	1.4733	0.258332	5.70312	1.18e-08	1.07e-06	Ups	gi|475572041|gb|EMT16402.1| Cytochrome P450 89A2 [Aegilops tauschii]	_	_
TRIAE_CS42_6BS_TGACv1_514827_AA1664770	9015	120	1	292	2.14	274	2.2	87	0.72	76	0.61	79	0.65	150.481	-1.14956	0.201732	-5.69846	1.21e-08	1.1e-06	Down	gi|473952980|gb|EMS50796.1| Chlorophyll a-b binding protein, chloroplastic [Triticum urartu]	K08912	cellular_component:membrane(GO:0016020);molecular_function:metal ion binding(GO:0046872);biological_process:photosynthesis, light harvesting(GO:0009765);cellular_component:chloroplast(GO:0009507)
TRIAE_CS42_6BL_TGACv1_500144_AA1599940	604	28	2.22	53	3.69	47	3.59	167	13.14	106	8.11	95	7.48	82.8959	1.23402	0.216624	5.69658	1.22e-08	1.11e-06	Ups	gi|326523889|dbj|BAJ96955.1| predicted protein [Hordeum vulgare subsp. vulgare]	_	molecular_function:calcium ion binding(GO:0005509)
TRIAE_CS42_2BS_TGACv1_145943_AA0450220	2882	213	3.08	309	3.91	324	4.51	97	1.39	163	2.27	86	1.23	194.599	-1.04006	0.182607	-5.69561	1.23e-08	1.11e-06	Down	gi|473993576|gb|EMS51970.1| Omega-hydroxypalmitate O-feruloyl transferase [Triticum urartu]	K15400	molecular_function:transferase activity, transferring acyl groups other than amino-acyl groups(GO:0016747)
TRIAE_CS42_2BS_TGACv1_147345_AA0482010	2705	52	0.79	72	0.96	58	0.85	193	2.92	121	1.78	129	1.95	104.398	1.11955	0.196597	5.69468	1.24e-08	1.12e-06	Ups	gi|960465197|ref|XP_014753876.1| PREDICTED: uncharacterized protein LOC100824278 [Brachypodium distachyon]<>gi|944068328|gb|KQK03812.1| hypothetical protein BRADI_2g09960 [Brachypodium distachyon]	_	_
TRIAE_CS42_5DL_TGACv1_434791_AA1441700	2057	49	1	60	1.08	32	0.63	120	2.44	176	3.47	96	1.95	88.8688	1.2097	0.212778	5.68526	1.31e-08	1.17e-06	Ups		_	_
TRIAE_CS42_6AS_TGACv1_487572_AA1571610	6746	97	0.56	132	0.67	101	0.57	330	1.9	265	1.48	158	0.91	180.519	1.06584	0.188165	5.66442	1.48e-08	1.31e-06	Ups	gi|326493672|dbj|BAJ85297.1| predicted protein [Hordeum vulgare subsp. vulgare]	_	_
TRIAE_CS42_2DS_TGACv1_177150_AA0566860	1957	49	1.03	43	0.8	31	0.63	8	0.17	4	0.08	4	0.08	22.6285	-1.45298	0.257302	-5.64699	1.63e-08	1.44e-06	Down	gi|475623487|gb|EMT32238.1| Cytochrome P450 76C4 [Aegilops tauschii]	_	molecular_function:heme binding(GO:0020037);molecular_function:oxidoreductase activity, acting on paired donors, with incorporation or reduction of molecular oxygen(GO:0016705);molecular_function:monooxygenase activity(GO:0004497);molecular_function:iron ion binding(GO:0005506);molecular_function:electron carrier activity(GO:0009055);biological_process:oxidation-reduction process(GO:0055114)
TRIAE_CS42_6BL_TGACv1_500618_AA1607360	1064	0	0	6	0.22	3	0.12	31	1.3	29	1.18	35	1.47	17.503	1.45321	0.2581	5.63041	1.8e-08	1.56e-06	Ups	gi|475564824|gb|EMT14622.1| Bifunctional dihydroflavonol 4-reductase/flavanone 4-reductase [Aegilops tauschii]	K09753	_
TRIAE_CS42_2BS_TGACv1_146341_AA0463010	2242	3	0.06	17	0.29	14	0.26	47	0.91	46	0.86	87	1.68	35.933	1.42838	0.253806	5.62784	1.82e-08	1.58e-06	Ups	gi|961455498|gb|ALS31335.1| cytochrome P450 CYP78A5-B [Triticum aestivum]	_	molecular_function:heme binding(GO:0020037);molecular_function:oxidoreductase activity, acting on paired donors, with incorporation or reduction of molecular oxygen(GO:0016705);molecular_function:monooxygenase activity(GO:0004497);molecular_function:iron ion binding(GO:0005506);molecular_function:electron carrier activity(GO:0009055);biological_process:oxidation-reduction process(GO:0055114)
TRIAE_CS42_2AL_TGACv1_093163_AA0273770	1865	133	2.94	136	2.64	153	3.26	44	0.97	46	0.98	69	1.51	95.3205	-1.10367	0.196355	-5.62079	1.9e-08	1.64e-06	Down	gi|326503130|dbj|BAJ99190.1| predicted protein [Hordeum vulgare subsp. vulgare]	K09286	biological_process:transcription, DNA-templated(GO:0006351)
TRIAE_CS42_3DL_TGACv1_249346_AA0846090	917	36	1.62	44	1.74	41	1.78	113	5.04	84	3.64	121	5.4	73.4811	1.16666	0.207664	5.61803	1.93e-08	1.66e-06	Ups	gi|475626848|gb|EMT33494.1| Zinc finger A20 and AN1 domain-containing stress-associated protein 2 [Aegilops tauschii]	_	_
TRIAE_CS42_1AL_TGACv1_000433_AA0012040	2585	23	0.43	33	0.54	35	0.63	1	0.02	4	0.07	1	0.02	15.6581	-1.4445	0.257265	-5.61483	1.97e-08	1.69e-06	Down	gi|699262619|gb|AIU41598.1| CO-like protein [Triticum aestivum]	_	_
TRIAE_CS42_4AL_TGACv1_291288_AA0993480	3015	56	0.77	57	0.68	23	0.3	128	1.74	131	1.73	114	1.55	85.0536	1.19339	0.213035	5.60187	2.12e-08	1.81e-06	Ups	gi|242085348|ref|XP_002443099.1| hypothetical protein SORBIDRAFT_08g008420 [Sorghum bicolor]<>gi|241943792|gb|EES16937.1| hypothetical protein SORBI_008G084900 [Sorghum bicolor]	_	biological_process:phosphorylation(GO:0016310);molecular_function:protein kinase activity(GO:0004672);molecular_function:nucleotide binding(GO:0000166)
TRIAE_CS42_2BL_TGACv1_130221_AA0406620	3599	18	0.25	14	0.17	13	0.17	59	0.81	59	0.78	55	0.75	36.628	1.34527	0.240715	5.58863	2.29e-08	1.93e-06	Ups	gi|82780768|gb|ABB90553.1| leucine-rich repeat protein 2 [Triticum aestivum]	_	_
TRIAE_CS42_5AS_TGACv1_393338_AA1271420	1435	9	0.26	22	0.55	13	0.36	50	1.43	55	1.52	75	2.14	37.4996	1.3682	0.244951	5.5856	2.33e-08	1.95e-06	Ups	gi|475623701|gb|EMT32339.1| hypothetical protein F775_12429 [Aegilops tauschii]	_	_
TRIAE_CS42_7DS_TGACv1_625379_AA2064980	5073	34	0.47	39	0.48	27	0.36	88	1.22	119	1.6	77	1.06	64.129	1.21091	0.216939	5.58181	2.38e-08	1.98e-06	Ups	gi|357148401|ref|XP_003574749.1| PREDICTED: probable lipoxygenase 8, chloroplastic [Brachypodium distachyon]<>gi|944063332|gb|KQJ98922.1| hypothetical protein BRADI_3g39980 [Brachypodium distachyon]	K00454	biological_process:oxylipin biosynthetic process(GO:0031408);molecular_function:iron ion binding(GO:0005506);molecular_function:linoleate 13S-lipoxygenase activity(GO:0016165);biological_process:oxidation-reduction process(GO:0055114)
TRIAE_CS42_7DL_TGACv1_603073_AA1975180	1409	46	1.89	61	2.2	63	2.5	139	5.66	132	5.23	117	4.77	93.1348	1.05805	0.189748	5.57605	2.46e-08	2.05e-06	Ups	gi|475497250|gb|EMT03993.1| hypothetical protein F775_32560 [Aegilops tauschii]	_	molecular_function:transferase activity(GO:0016740)
TRIAE_CS42_7DL_TGACv1_606411_AA2010000	874	57	2.69	92	3.81	61	2.78	24	1.12	6	0.27	14	0.66	41.047	-1.37035	0.247053	-5.54679	2.91e-08	2.39e-06	Down	gi|474429044|gb|EMS67859.1| Ethylene-responsive transcription factor RAP2-13 [Triticum urartu]	K09286	_
TRIAE_CS42_7DL_TGACv1_604042_AA1993040	3543	35	0.23	56	0.33	57	0.37	107	0.71	110	0.71	162	1.08	88.0755	1.14353	0.206651	5.53363	3.14e-08	2.55e-06	Ups	gi|475595883|gb|EMT23194.1| Putative LRR receptor-like serine/threonine-protein kinase [Aegilops tauschii]	_	biological_process:protein phosphorylation(GO:0006468);molecular_function:ATP binding(GO:0005524);molecular_function:protein serine/threonine kinase activity(GO:0004674);molecular_function:protein kinase activity(GO:0004672);molecular_function:nucleotide binding(GO:0000166)
TRIAE_CS42_5BL_TGACv1_405334_AA1325280	4285	21	0.59	45	1.1	24	0.65	100	2.78	82	2.21	84	2.33	59.3763	1.23323	0.223177	5.52578	3.28e-08	2.65e-06	Ups	gi|326492353|dbj|BAK01960.1| predicted protein, partial [Hordeum vulgare subsp. vulgare]	_	biological_process:cellular metabolic process(GO:0044237);molecular_function:nucleotide binding(GO:0000166);molecular_function:coenzyme binding(GO:0050662);molecular_function:catalytic activity(GO:0003824)
TRIAE_CS42_7BS_TGACv1_592498_AA1939250	2512	90	3.08	132	3.96	126	4.15	43	1.46	46	1.52	37	1.26	77.2702	-1.12199	0.203179	-5.52216	3.35e-08	2.7e-06	Down	gi|475601774|gb|EMT24935.1| hypothetical protein F775_30239 [Aegilops tauschii]	K17991	_
TRIAE_CS42_7BL_TGACv1_581356_AA1917140	2291	22	0.85	59	2	42	1.57	479	18.4	188	7.02	271	10.42	178.938	1.42375	0.258363	5.51064	3.58e-08	2.86e-06	Ups	gi|475534655|gb|EMT08613.1| hypothetical protein F775_27362 [Aegilops tauschii]	_	_
TRIAE_CS42_2DS_TGACv1_178659_AA0599140	1894	142	1.91	158	1.86	110	1.42	45	0.6	66	0.85	46	0.61	92.5818	-1.08012	0.196787	-5.48881	4.05e-08	3.2e-06	Down	gi|475527729|gb|EMT07518.1| Peroxidase 2 [Aegilops tauschii]	K00430	_
TRIAE_CS42_2BL_TGACv1_130134_AA0404680	1445	123	3.99	272	7.75	104	3.25	58	1.87	44	1.38	54	1.74	105.253	-1.2022	0.219157	-5.48556	4.12e-08	3.24e-06	Down	gi|326505110|dbj|BAK02942.1| predicted protein [Hordeum vulgare subsp. vulgare]	K00430	molecular_function:heme binding(GO:0020037);molecular_function:metal ion binding(GO:0046872);molecular_function:peroxidase activity(GO:0004601);biological_process:oxidation-reduction process(GO:0055114);biological_process:response to oxidative stress(GO:0006979)
TRIAE_CS42_4BL_TGACv1_320289_AA1034070	1175	93	3.27	104	3.2	114	3.86	35	1.22	32	1.08	42	1.46	68.7703	-1.1435	0.208489	-5.4847	4.14e-08	3.25e-06	Down	gi|987312900|gb|AMD78108.1| heat-responsive transcription factor HSF85 [Triticum aestivum]	K09419	molecular_function:DNA binding(GO:0003677)
TRIAE_CS42_5BL_TGACv1_404184_AA1288940	5536	143	4.09	152	3.81	166	4.57	48	1.36	80	2.2	27	0.77	100.748	-1.17373	0.214011	-5.48445	4.15e-08	3.25e-06	Down	gi|475505580|gb|EMT04740.1| Non-specific lipid-transfer protein-like protein [Aegilops tauschii]	_	_
TRIAE_CS42_7DL_TGACv1_602877_AA1970850	14279	57	0.41	110	0.7	97	0.67	155	1.11	237	1.65	189	1.35	140.515	1.02603	0.18734	5.47685	4.33e-08	3.38e-06	Ups	gi|357154816|ref|XP_003576911.1| PREDICTED: glutathione synthetase, chloroplastic-like isoform X1 [Brachypodium distachyon]<>gi|944056073|gb|KQJ91711.1| hypothetical protein BRADI_4g39310 [Brachypodium distachyon]	K01920	cellular_component:cytosol(GO:0005829);biological_process:response to jasmonic acid(GO:0009753);biological_process:glutathione biosynthetic process(GO:0006750);molecular_function:glutathione synthase activity(GO:0004363);molecular_function:ATP binding(GO:0005524);cellular_component:chloroplast(GO:0009507)
TRIAE_CS42_5BL_TGACv1_408835_AA1364590	743	78	4.33	107	5.21	143	7.65	21	1.16	49	2.62	20	1.1	68.1572	-1.27429	0.233577	-5.45554	4.88e-08	3.79e-06	Down		_	_
TRIAE_CS42_4AS_TGACv1_307322_AA1019450	5355	43	0.61	80	1	47	0.64	126	1.78	190	2.6	111	1.57	99.2384	1.12555	0.206724	5.44471	5.19e-08	4.01e-06	Ups	gi|326502816|dbj|BAJ99036.1| predicted protein [Hordeum vulgare subsp. vulgare]<>gi|326507002|dbj|BAJ95578.1| predicted protein [Hordeum vulgare subsp. vulgare]<>gi|326516198|dbj|BAJ88122.1| predicted protein [Hordeum vulgare subsp. vulgare]	K16839	biological_process:oxidation-reduction process(GO:0055114);molecular_function:oxidoreductase activity(GO:0016491)
TRIAE_CS42_5BL_TGACv1_406720_AA1349240	816	44	2.6	72	3.73	91	5.18	195	11.41	210	11.95	116	6.79	121.481	1.11978	0.206687	5.41777	6.03e-08	4.59e-06	Ups	gi|474427663|gb|EMS67800.1| putative calcium-binding protein CML25/26 [Triticum urartu]	K13448	_
TRIAE_CS42_3AL_TGACv1_194234_AA0629300	3001	8	0.11	20	0.24	21	0.28	76	1.04	65	0.86	48	0.66	39.8491	1.32224	0.244057	5.41774	6.04e-08	4.59e-06	Ups	gi|357130334|ref|XP_003566804.1| PREDICTED: serine decarboxylase 1-like [Brachypodium distachyon]<>gi|944072947|gb|KQK08431.1| hypothetical protein BRADI_2g41817 [Brachypodium distachyon]	_	molecular_function:pyridoxal phosphate binding(GO:0030170);biological_process:carboxylic acid metabolic process(GO:0019752);molecular_function:carboxy-lyase activity(GO:0016831)
TRIAE_CS42_6AS_TGACv1_485780_AA1552040	1957	133	2.97	162	3.17	160	3.44	75	1.66	65	1.4	40	0.89	103.862	-1.04986	0.194165	-5.40704	6.41e-08	4.84e-06	Down		_	_
TRIAE_CS42_1DS_TGACv1_080922_AA0255680	949	7	0.3	14	0.53	20	0.84	53	2.29	44	1.84	81	3.49	36.8281	1.34708	0.249574	5.39753	6.76e-08	5.08e-06	Ups		_	_
TRIAE_CS42_6AL_TGACv1_472082_AA1517570	1294	130	4.83	121	3.95	118	4.23	32	1.18	48	1.72	57	2.1	83.0028	-1.09818	0.203731	-5.39034	7.03e-08	5.26e-06	Down		_	_
TRIAE_CS42_2AS_TGACv1_112268_AA0334510	1073	178	3.61	239	4.25	167	3.27	40	0.8	83	1.62	98	1.97	131.124	-1.07884	0.200354	-5.38464	7.26e-08	5.41e-06	Down	gi|474301978|gb|EMS61635.1| Blue copper protein [Triticum urartu]	_	molecular_function:copper ion binding(GO:0005507);molecular_function:electron carrier activity(GO:0009055)
TRIAE_CS42_1AL_TGACv1_003611_AA0050710	1055	6	0.27	15	0.6	14	0.61	60	2.7	56	2.45	38	1.71	31.6603	1.34602	0.250265	5.37838	7.52e-08	5.58e-06	Ups	gi|357129349|ref|XP_003566326.1| PREDICTED: protein YLS9-like [Brachypodium distachyon]<>gi|944071172|gb|KQK06656.1| hypothetical protein BRADI_2g27687 [Brachypodium distachyon]	_	_
TRIAE_CS42_5AL_TGACv1_374107_AA1190500	1941	50	0.57	78	0.78	45	0.5	9	0.1	18	0.2	10	0.11	33.8715	-1.33522	0.248268	-5.37815	7.53e-08	5.59e-06	Down	gi|326501968|dbj|BAK06476.1| predicted protein [Hordeum vulgare subsp. vulgare]	K09419	_
TRIAE_CS42_4DS_TGACv1_361920_AA1174310	1749	2	0.06	16	0.43	8	0.24	44	1.33	54	1.59	41	1.24	27.5805	1.37423	0.255717	5.37402	7.7e-08	5.69e-06	Ups	gi|475502934|gb|EMT04483.1| Transcription factor MYB21 [Aegilops tauschii]	K09422	_
TRIAE_CS42_3DS_TGACv1_273457_AA0931400	9030	8	0.18	26	0.52	15	0.33	92	2.08	47	1.03	60	1.36	41.525	1.33128	0.247727	5.37398	7.7e-08	5.69e-06	Ups	gi|475580447|gb|EMT18595.1| Putative LRR receptor-like serine/threonine-protein kinase [Aegilops tauschii]	_	_
TRIAE_CS42_3B_TGACv1_220832_AA0720780	2861	2	0.04	7	0.13	1	0.02	43	0.93	22	0.46	31	0.67	17.8573	1.38261	0.257812	5.36286	8.19e-08	6.04e-06	Ups	gi|670020908|emb|CDJ26399.1| unnamed protein product [Triticum aestivum]	_	_
TRIAE_CS42_4BS_TGACv1_327871_AA1077160	4084	16	0.08	17	0.08	17	0.09	69	0.36	55	0.28	52	0.27	37.9235	1.28029	0.239236	5.35157	8.72e-08	6.39e-06	Ups	gi|514727359|ref|XP_004956203.1| PREDICTED: fatty acyl-CoA reductase 1-like [Setaria italica]	_	molecular_function:fatty-acyl-CoA reductase (alcohol-forming) activity(GO:0080019);molecular_function:nucleotide binding(GO:0000166)
TRIAE_CS42_7BS_TGACv1_592029_AA1928680	70465	159	4.91	220	5.96	261	7.76	100	3.06	45	1.34	94	2.88	143.853	-1.08701	0.203139	-5.35106	8.74e-08	6.4e-06	Down	gi|475466922|gb|EMT02225.1| Chlorophyll a-b binding protein, chloroplastic [Aegilops tauschii]	K08912	cellular_component:membrane(GO:0016020);molecular_function:metal ion binding(GO:0046872);biological_process:photosynthesis, light harvesting(GO:0009765);cellular_component:chloroplast(GO:0009507)
TRIAE_CS42_7DS_TGACv1_623124_AA2049820	965	149	6.94	176	7.19	137	6.15	31	1.43	82	3.68	54	2.5	102.587	-1.11105	0.207955	-5.34275	9.15e-08	6.66e-06	Down	gi|475428874|gb|EMT01166.1| hypothetical protein F775_04463 [Aegilops tauschii]	_	cellular_component:membrane(GO:0016020)
TRIAE_CS42_5DS_TGACv1_457105_AA1482380	3634	35	0.4	52	0.52	29	0.32	110	1.24	84	0.92	106	1.19	69.4375	1.13502	0.212469	5.34206	9.19e-08	6.67e-06	Ups	gi|1002310249|ref|XP_015618491.1| PREDICTED: receptor-like protein kinase HSL1 [Oryza sativa Japonica Group]<>gi|77557146|gb|ABA99942.1| Leucine Rich Repeat family protein, expressed [Oryza sativa Japonica Group]<>gi|113649855|dbj|BAF30367.1| Os12g0632900 [Oryza sativa Japonica Group]<>gi|125580178|gb|EAZ21324.1| hypothetical protein OsJ_36978 [Oryza sativa Japonica Group]<>gi|937943316|dbj|BAT18…	K08884	molecular_function:protein kinase activity(GO:0004672);molecular_function:nucleotide binding(GO:0000166)
TRIAE_CS42_7BL_TGACv1_576755_AA1853830	8884	67	1.68	99	2.18	120	2.9	32	0.8	32	0.77	27	0.67	61.5088	-1.18669	0.222148	-5.34187	9.2e-08	6.67e-06	Down	gi|326518556|dbj|BAJ88307.1| predicted protein [Hordeum vulgare subsp. vulgare]	K08235	biological_process:cellular glucan metabolic process(GO:0006073);molecular_function:hydrolase activity, hydrolyzing O-glycosyl compounds(GO:0004553);cellular_component:apoplast(GO:0048046);cellular_component:cell wall(GO:0005618);molecular_function:xyloglucan:xyloglucosyl transferase activity(GO:0016762)
TRIAE_CS42_2AS_TGACv1_112597_AA0341920	7533	7	0.05	17	0.1	10	0.07	39	0.26	48	0.31	63	0.42	30.8194	1.34004	0.250918	5.34054	9.27e-08	6.71e-06	Ups	gi|475621282|gb|EMT31420.1| Wall-associated receptor kinase 2 [Aegilops tauschii]	_	molecular_function:ion binding(GO:0043167);molecular_function:protein kinase activity(GO:0004672)
TRIAE_CS42_4BS_TGACv1_328163_AA1083820	690	64	4.59	120	7.54	87	6.01	249	17.69	179	12.36	157	11.16	142.432	1.00415	0.188431	5.32901	9.88e-08	7.11e-06	Ups	gi|475572642|gb|EMT16549.1| hypothetical protein F775_09771 [Aegilops tauschii]	_	_
TRIAE_CS42_3AL_TGACv1_194291_AA0630500	1811	99	2.52	121	2.7	116	2.84	34	0.86	50	1.23	43	1.09	75.6645	-1.07793	0.202379	-5.32626	1e-07	7.2e-06	Down	gi|669029467|emb|CDM83670.1| unnamed protein product [Triticum aestivum]	K09422	molecular_function:DNA binding(GO:0003677);molecular_function:chromatin binding(GO:0003682)
TRIAE_CS42_6DL_TGACv1_528006_AA1710710	1335	34	1.14	77	2.26	43	1.39	9	0.3	9	0.29	11	0.37	29.3296	-1.34195	0.253111	-5.30182	1.15e-07	8.12e-06	Down	gi|326530808|dbj|BAK01202.1| predicted protein [Hordeum vulgare subsp. vulgare]	_	cellular_component:mitochondrion(GO:0005739)
TRIAE_CS42_2DL_TGACv1_158803_AA0526410	2259	106	2.92	81	1.96	85	2.26	18	0.49	27	0.72	38	1.04	58.3307	-1.20655	0.227736	-5.298	1.17e-07	8.28e-06	Down	gi|514803120|ref|XP_004976450.1| PREDICTED: probable pectinesterase 68 [Setaria italica]<>gi|944234024|gb|KQK98386.1| hypothetical protein SETIT_012719mg [Setaria italica]	K01051	molecular_function:lipid transporter activity(GO:0005319);biological_process:cell wall modification(GO:0042545);cellular_component:chloroplast outer membrane(GO:0009707);cellular_component:cell wall(GO:0005618);biological_process:lipid transport(GO:0006869);molecular_function:pectinesterase activity(GO:0030599);molecular_function:aspartyl esterase activity(GO:0045330)
TRIAE_CS42_7DS_TGACv1_621762_AA2025460	1367	93	3.47	103	3.37	140	5.03	48	1.77	15	0.54	35	1.29	71.1183	-1.2248	0.231425	-5.29242	1.21e-07	8.52e-06	Down	gi|474193959|gb|EMS58285.1| Blue copper protein [Triticum urartu]	_	molecular_function:copper ion binding(GO:0005507);molecular_function:electron carrier activity(GO:0009055)
TRIAE_CS42_7DS_TGACv1_621596_AA2020420	1089	66	3.16	82	3.44	70	3.23	15	0.71	14	0.65	30	1.42	45.1183	-1.25235	0.23674	-5.28999	1.22e-07	8.59e-06	Down	gi|32765707|gb|AAP87359.1| high light protein [Hordeum vulgare]<>gi|326516354|dbj|BAJ92332.1| predicted protein [Hordeum vulgare subsp. vulgare]	_	_
TRIAE_CS42_2BL_TGACv1_132648_AA0438860	1936	147	3.62	219	4.72	202	4.79	50	1.22	105	2.49	75	1.83	130.106	-1.02172	0.19352	-5.27966	1.29e-07	9.06e-06	Down	gi|326526193|dbj|BAJ93273.1| predicted protein [Hordeum vulgare subsp. vulgare]	K06215	cellular_component:cytosol(GO:0005829);biological_process:pyridoxal phosphate biosynthetic process(GO:0042823);biological_process:response to UV-B(GO:0010224);biological_process:chlorophyll metabolic process(GO:0015994);biological_process:response to non-ionic osmotic stress(GO:0010335);biological_process:pyridoxine biosynthetic process(GO:0008615);biological_process:hyperosmotic salinity respons…
TRIAE_CS42_5DL_TGACv1_438233_AA1468050	1500	77	2.27	61	1.58	84	2.39	17	0.5	23	0.65	24	0.7	47.0047	-1.22958	0.232994	-5.2773	1.31e-07	9.16e-06	Down	gi|475361702|gb|EMT00489.1| hypothetical protein F775_11329 [Aegilops tauschii]	_	_
TRIAE_CS42_3DL_TGACv1_249735_AA0855420	2216	13	0.24	26	0.42	21	0.38	70	1.29	49	0.88	85	1.57	44.2254	1.25846	0.239136	5.26253	1.42e-07	9.85e-06	Ups	gi|669028155|emb|CDM81847.1| unnamed protein product [Triticum aestivum]	_	biological_process:regulation of transcription, DNA-templated(GO:0006355)
TRIAE_CS42_6BL_TGACv1_502537_AA1625340	2012	183	5.51	174	4.6	154	4.47	45	1.34	88	2.55	78	2.33	118.401	-1.00912	0.191961	-5.2569	1.47e-07	1.01e-05	Down	gi|473970637|gb|EMS51422.1| Bidirectional sugar transporter SWEET13 [Triticum urartu]	K15382	cellular_component:integral component of membrane(GO:0016021);cellular_component:plasma membrane(GO:0005886);biological_process:carbohydrate transport(GO:0008643)
TRIAE_CS42_1AS_TGACv1_019565_AA0068460	2885	4	0.05	14	0.16	7	0.09	49	0.64	54	0.68	29	0.38	26.2602	1.34631	0.256109	5.25679	1.47e-07	1.01e-05	Ups	gi|326516936|dbj|BAJ96460.1| predicted protein [Hordeum vulgare subsp. vulgare]<>gi|326526275|dbj|BAJ97154.1| predicted protein [Hordeum vulgare subsp. vulgare]	_	biological_process:protein phosphorylation(GO:0006468);molecular_function:ATP binding(GO:0005524);molecular_function:protein serine/threonine kinase activity(GO:0004674)
TRIAE_CS42_2DS_TGACv1_177481_AA0578310	1771	22	0.51	29	0.59	19	0.43	50	1.16	110	2.47	72	1.66	50.4233	1.2451	0.237178	5.24965	1.52e-07	1.05e-05	Ups	gi|326494006|dbj|BAJ85465.1| predicted protein [Hordeum vulgare subsp. vulgare]	_	molecular_function:transferase activity, transferring glycosyl groups(GO:0016757)
TRIAE_CS42_6DL_TGACv1_527714_AA1707840	1052	49	2.1	47	1.76	71	2.93	144	6.11	114	4.7	128	5.44	92.6152	1.04228	0.19863	5.24733	1.54e-07	1.05e-05	Ups		_	_
TRIAE_CS42_7DL_TGACv1_603474_AA1984390	21120	111	4.25	252	8.45	195	7.19	83	3.15	70	2.58	64	2.43	125.632	-1.04276	0.198962	-5.24098	1.6e-07	1.09e-05	Down	gi|326507194|dbj|BAJ95674.1| predicted protein [Hordeum vulgare subsp. vulgare]<>gi|326507586|dbj|BAK03186.1| predicted protein [Hordeum vulgare subsp. vulgare]	_	molecular_function:metal ion binding(GO:0046872);molecular_function:nucleoside-triphosphatase activity(GO:0017111);biological_process:protein metabolic process(GO:0019538);molecular_function:ATP binding(GO:0005524);molecular_function:DNA binding(GO:0003677);cellular_component:chloroplast envelope(GO:0009941);cellular_component:apoplast(GO:0048046);molecular_function:translation elongation factor …
TRIAE_CS42_5DL_TGACv1_433339_AA1410070	3396	10	0.35	17	0.52	10	0.34	87	3.04	26	0.88	65	2.27	36.1915	1.33307	0.254575	5.23647	1.64e-07	1.11e-05	Ups	gi|475469519|gb|EMT02318.1| Putative LRR receptor-like serine/threonine-protein kinase [Aegilops tauschii]	_	_
TRIAE_CS42_7AS_TGACv1_571414_AA1847500	9093	83	1.67	110	1.94	89	1.73	35	0.7	35	0.68	31	0.62	62.4329	-1.10434	0.211111	-5.23109	1.69e-07	1.14e-05	Down	gi|326494830|dbj|BAJ94534.1| predicted protein [Hordeum vulgare subsp. vulgare]	K14432	molecular_function:sequence-specific DNA binding transcription factor activity(GO:0003700);molecular_function:sequence-specific DNA binding(GO:0043565);biological_process:regulation of transcription, DNA-templated(GO:0006355)
TRIAE_CS42_4AL_TGACv1_290448_AA0985540	5011	54	0.6	131	1.27	69	0.73	153	1.67	220	2.34	199	2.18	137.02	1.03527	0.197982	5.22908	1.7e-07	1.15e-05	Ups	gi|475155158|gb|EMT00031.1| Disease resistance protein RPM1 [Aegilops tauschii]	K13457	_
TRIAE_CS42_5DS_TGACv1_456698_AA1476450	1543	29	0.78	27	0.63	30	0.77	86	2.28	60	1.55	103	2.73	56.2392	1.18053	0.226283	5.21706	1.82e-07	1.22e-05	Ups	gi|475623701|gb|EMT32339.1| hypothetical protein F775_12429 [Aegilops tauschii]	_	_
TRIAE_CS42_2BS_TGACv1_146323_AA0462570	2193	7	0.11	12	0.17	8	0.12	58	0.91	74	1.12	20	0.31	29.9754	1.34137	0.257178	5.21574	1.83e-07	1.23e-05	Ups	gi|475528301|gb|EMT07605.1| hypothetical protein F775_29486 [Aegilops tauschii]	_	_
TRIAE_CS42_5BL_TGACv1_408288_AA1362620	3181	101	2.02	86	1.51	86	1.66	23	0.46	38	0.73	31	0.62	59.8817	-1.14442	0.219544	-5.21271	1.86e-07	1.24e-05	Down	gi|475526577|gb|EMT07332.1| S-adenosylmethionine decarboxylase proenzyme [Aegilops tauschii]	K01611	_
TRIAE_CS42_2AS_TGACv1_114964_AA0370240	3345	25	0.33	30	0.35	27	0.34	81	1.06	59	0.75	97	1.27	53.461	1.18036	0.226628	5.20836	1.91e-07	1.27e-05	Ups	gi|326496328|dbj|BAJ94626.1| predicted protein [Hordeum vulgare subsp. vulgare]	_	molecular_function:hydrolase activity(GO:0016787);cellular_component:plastid(GO:0009536);biological_process:response to arsenic-containing substance(GO:0046685)
TRIAE_CS42_5BL_TGACv1_404570_AA1304520	2282	66	1.51	82	1.65	64	1.41	20	0.45	27	0.6	8	0.18	43.3864	-1.25597	0.241166	-5.20791	1.91e-07	1.27e-05	Down	gi|326501968|dbj|BAK06476.1| predicted protein [Hordeum vulgare subsp. vulgare]	K09419	molecular_function:transferase activity(GO:0016740)
TRIAE_CS42_5AL_TGACv1_375132_AA1216590	3617	59	2.42	82	2.95	104	4.11	23	0.94	31	1.23	18	0.73	51.7151	-1.2084	0.232515	-5.19708	2.02e-07	1.33e-05	Down	gi|404415334|gb|AFR67805.1| AP2 domain CBF protein [Triticum aestivum]	K09286	molecular_function:sequence-specific DNA binding transcription factor activity(GO:0003700);molecular_function:DNA binding(GO:0003677);cellular_component:nucleus(GO:0005634);biological_process:regulation of transcription, DNA-templated(GO:0006355)
TRIAE_CS42_7DS_TGACv1_621450_AA2015990	1306	63	1.99	124	3.44	113	3.44	36	1.13	18	0.55	36	1.13	63.2761	-1.19421	0.230015	-5.19191	2.08e-07	1.37e-05	Down	gi|475481179|gb|EMT02870.1| Zinc finger protein CONSTANS-LIKE 3 [Aegilops tauschii]	_	molecular_function:2 iron, 2 sulfur cluster binding(GO:0051537);molecular_function:zinc ion binding(GO:0008270);cellular_component:intracellular(GO:0005622)
TRIAE_CS42_7AS_TGACv1_569429_AA1815620	3311	12	0.22	34	0.55	10	0.18	133	2.43	66	1.17	45	0.82	50.1744	1.31213	0.252797	5.19045	2.1e-07	1.37e-05	Ups	gi|475525187|gb|EMT07127.1| Cysteine-rich receptor-like protein kinase 10 [Aegilops tauschii]	_	biological_process:protein phosphorylation(GO:0006468);molecular_function:ATP binding(GO:0005524);molecular_function:protein serine/threonine kinase activity(GO:0004674)
TRIAE_CS42_1DL_TGACv1_064917_AA0236160	1219	50	2.27	88	3.51	78	3.42	190	8.57	160	7.01	122	5.51	114.56	1.00226	0.193176	5.18834	2.12e-07	1.38e-05	Ups	gi|326490069|dbj|BAJ94108.1| predicted protein [Hordeum vulgare subsp. vulgare]	_	_
TRIAE_CS42_4DS_TGACv1_361015_AA1158790	971	25	1.18	51	2.1	47	2.13	121	5.65	108	4.9	85	3.97	72.8617	1.11139	0.214345	5.18506	2.16e-07	1.4e-05	Ups	gi|475572643|gb|EMT16550.1| hypothetical protein F775_32329 [Aegilops tauschii]	_	_
TRIAE_CS42_4AL_TGACv1_288905_AA0961060	3129	271	6.33	593	12.15	494	11.12	2520	58.39	1286	28.96	1606	37.23	1135.66	1.29538	0.249858	5.18447	2.17e-07	1.41e-05	Ups	gi|473764222|gb|EMS45891.1| Alcohol dehydrogenase 3 [Triticum urartu]	K18857	molecular_function:oxidoreductase activity(GO:0016491);molecular_function:nucleotide binding(GO:0000166);biological_process:oxidation-reduction process(GO:0055114);molecular_function:zinc ion binding(GO:0008270)
TRIAE_CS42_2DL_TGACv1_159423_AA0538160	2057	73	1.46	82	1.44	82	1.59	30	0.6	18	0.35	27	0.54	51.0175	-1.17101	0.225952	-5.18255	2.19e-07	1.42e-05	Down	gi|326527137|dbj|BAK04510.1| predicted protein [Hordeum vulgare subsp. vulgare]	_	_
TRIAE_CS42_5BL_TGACv1_404512_AA1302580	3079	39	0.58	46	0.6	47	0.67	89	1.31	106	1.52	115	1.69	73.8377	1.0516	0.202941	5.18177	2.2e-07	1.42e-05	Ups	gi|475481341|gb|EMT02880.1| hypothetical protein F775_08276 [Aegilops tauschii]	_	_
TRIAE_CS42_1BS_TGACv1_050480_AA0172590	749	39	2.15	51	2.46	35	1.86	92	5.03	100	5.31	104	5.68	70.2233	1.05928	0.204704	5.17467	2.28e-07	1.47e-05	Ups	gi|326489555|dbj|BAK01758.1| predicted protein [Hordeum vulgare subsp. vulgare]<>gi|326530728|dbj|BAK01162.1| predicted protein [Hordeum vulgare subsp. vulgare]	_	_
TRIAE_CS42_2BS_TGACv1_146937_AA0475600	1019	170	7.62	194	7.62	115	4.97	49	2.18	65	2.81	79	3.51	109.71	-1.01707	0.196723	-5.17003	2.34e-07	1.49e-05	Down	gi|474301978|gb|EMS61635.1| Blue copper protein [Triticum urartu]	_	_
TRIAE_CS42_2DL_TGACv1_158074_AA0508050	3029	20	0.2	33	0.3	7	0.07	81	0.82	104	1.03	48	0.49	48.8748	1.28337	0.248244	5.1698	2.34e-07	1.49e-05	Ups	gi|475567813|gb|EMT15351.1| hypothetical protein F775_09386 [Aegilops tauschii]	_	_
TRIAE_CS42_5DL_TGACv1_434621_AA1438880	4305	82	1.23	108	1.42	99	1.43	26	0.39	33	0.48	43	0.64	63.804	-1.10716	0.214661	-5.15768	2.5e-07	1.57e-05	Down	gi|326498283|dbj|BAJ98569.1| predicted protein [Hordeum vulgare subsp. vulgare]<>gi|326526485|dbj|BAJ97259.1| predicted protein [Hordeum vulgare subsp. vulgare]	K14638	biological_process:transport(GO:0006810);cellular_component:membrane(GO:0016020);molecular_function:transporter activity(GO:0005215)
TRIAE_CS42_3AL_TGACv1_193938_AA0622990	2085	50	0.99	68	1.18	68	1.3	172	3.38	130	2.48	110	2.16	99.791	1.00788	0.195513	5.15505	2.54e-07	1.59e-05	Ups	gi|57899369|dbj|BAD88016.1| myosin heavy chain-like protein [Oryza sativa Japonica Group]	_	_
TRIAE_CS42_5AL_TGACv1_377478_AA1247110	948	45	1.96	44	1.68	69	2.89	6	0.26	18	0.75	7	0.3	30.906	-1.30928	0.253992	-5.1548	2.54e-07	1.59e-05	Down	gi|475505580|gb|EMT04740.1| Non-specific lipid-transfer protein-like protein [Aegilops tauschii]	_	_
TRIAE_CS42_2AL_TGACv1_093002_AA0269180	1746	125	2.58	149	2.69	174	3.46	49	1	48	0.95	81	1.66	102.614	-1.0288	0.199696	-5.15184	2.58e-07	1.61e-05	Down	gi|357167757|ref|XP_003581318.1| PREDICTED: uncharacterized protein LOC100823433 [Brachypodium distachyon]<>gi|944047351|gb|KQJ82992.1| hypothetical protein BRADI_5g12490 [Brachypodium distachyon]	_	cellular_component:plastid(GO:0009536);cellular_component:membrane(GO:0016020)
TRIAE_CS42_6DL_TGACv1_528710_AA1715790	2465	42	0.7	79	1.16	75	1.21	13	0.22	23	0.37	13	0.22	39.6613	-1.25618	0.244025	-5.14773	2.64e-07	1.64e-05	Down	gi|10442763|gb|AAG17470.1|AF123610_9 cytochrome P450 [Triticum aestivum]	K15398	molecular_function:heme binding(GO:0020037);molecular_function:oxidoreductase activity, acting on paired donors, with incorporation or reduction of molecular oxygen(GO:0016705);molecular_function:monooxygenase activity(GO:0004497);molecular_function:iron ion binding(GO:0005506);molecular_function:electron carrier activity(GO:0009055);biological_process:oxidation-reduction process(GO:0055114)
TRIAE_CS42_1DL_TGACv1_061063_AA0183610	2936	71	1.16	163	2.34	101	1.6	306	4.97	281	4.44	162	2.64	179.963	1.02217	0.199068	5.13479	2.82e-07	1.75e-05	Ups	gi|992158781|gb|KXG22100.1| hypothetical protein SORBI_009G152700 [Sorghum bicolor]	K03841	biological_process:carbohydrate metabolic process(GO:0005975);molecular_function:fructose 1,6-bisphosphate 1-phosphatase activity(GO:0042132)
TRIAE_CS42_5AL_TGACv1_377315_AA1245850	2410	95	1.36	139	1.74	147	2.02	63	0.89	38	0.52	42	0.59	85.5819	-1.0653	0.207478	-5.13453	2.83e-07	1.75e-05	Down	gi|21667479|gb|AAM74066.1|AF490471_1 CONSTANS-like protein [Hordeum vulgare subsp. vulgare]	_	_
TRIAE_CS42_3AL_TGACv1_196850_AA0663290	1389	12	0.42	39	1.19	26	0.87	72	2.48	114	3.81	64	2.2	54.4233	1.22402	0.238552	5.13105	2.88e-07	1.78e-05	Ups	gi|998630514|gb|AMK51204.1| WRKY protein, partial [Triticum aestivum]	_	_
TRIAE_CS42_5BL_TGACv1_406039_AA1339590	2779	59	2.86	37	1.57	42	1.96	6	0.29	14	0.65	5	0.24	26.7634	-1.31117	0.255933	-5.12312	3.01e-07	1.84e-05	Down		_	_
TRIAE_CS42_5DL_TGACv1_437070_AA1464910	1224	32	1.2	39	1.28	14	0.5	76	2.82	78	2.81	96	3.56	55.9878	1.18004	0.230401	5.12168	3.03e-07	1.85e-05	Ups	gi|475451114|gb|EMT01699.1| Blue copper protein [Aegilops tauschii]	_	molecular_function:copper ion binding(GO:0005507);molecular_function:electron carrier activity(GO:0009055)
TRIAE_CS42_7AL_TGACv1_556175_AA1757550	6275	43	1.34	87	2.37	69	2.07	165	5.09	170	5.09	112	3.46	107.418	1.02009	0.199236	5.12004	3.05e-07	1.87e-05	Ups	gi|514765955|ref|XP_004965880.1| PREDICTED: lipid phosphate phosphatase 2-like isoform X1 [Setaria italica]<>gi|944247114|gb|KQL11408.1| hypothetical protein SETIT_006896mg [Setaria italica]	_	cellular_component:membrane(GO:0016020);molecular_function:catalytic activity(GO:0003824);biological_process:metabolic process(GO:0008152)
TRIAE_CS42_4BL_TGACv1_321987_AA1067500	1055	58	2.27	132	4.53	82	3.09	31	1.2	18	0.68	30	1.16	56.5953	-1.19608	0.233697	-5.11807	3.09e-07	1.89e-05	Down	gi|326529695|dbj|BAK04794.1| predicted protein [Hordeum vulgare subsp. vulgare]	_	_
TRIAE_CS42_6DL_TGACv1_527217_AA1700660	3875	98	1.14	147	1.5	160	1.8	63	0.73	45	0.51	52	0.6	92.3198	-1.02798	0.200924	-5.11624	3.12e-07	1.9e-05	Down	gi|262192761|gb|ACY30448.1| LRR receptor-like kinase [Triticum aestivum]	_	biological_process:protein phosphorylation(GO:0006468);molecular_function:ATP binding(GO:0005524);molecular_function:protein serine/threonine kinase activity(GO:0004674)
TRIAE_CS42_2BL_TGACv1_132222_AA0436110	5231	17	0.26	30	0.4	46	0.67	88	1.32	79	1.15	102	1.53	60.6344	1.16795	0.228744	5.10592	3.29e-07	2e-05	Ups	gi|475600343|gb|EMT24509.1| Putative metal-nicotianamine transporter YSL12 [Aegilops tauschii]	_	biological_process:transmembrane transport(GO:0055085);cellular_component:plasma membrane(GO:0005886)
TRIAE_CS42_1BL_TGACv1_033547_AA0140310	1068	69	2.67	122	4.13	140	5.21	36	1.38	46	1.71	29	1.11	71.957	-1.13148	0.221717	-5.10327	3.34e-07	2.02e-05	Down	gi|474060351|gb|EMS53958.1| Chlorophyll a-b binding protein 3C, chloroplastic [Triticum urartu]	K08912	cellular_component:membrane(GO:0016020);molecular_function:metal ion binding(GO:0046872);biological_process:photosynthesis, light harvesting(GO:0009765);cellular_component:chloroplast(GO:0009507)
TRIAE_CS42_3AL_TGACv1_195183_AA0646070	2984	24	0.27	25	0.25	22	0.24	84	0.95	55	0.6	71	0.8	47.1168	1.17635	0.230811	5.09657	3.46e-07	2.08e-05	Ups	gi|474330188|gb|EMS62587.1| hypothetical protein TRIUR3_23961 [Triticum urartu]	_	_
TRIAE_CS42_U_TGACv1_641408_AA2094170	2805	78	2	77	1.73	64	1.58	19	0.48	26	0.64	24	0.61	47.0852	-1.16269	0.228504	-5.08826	3.61e-07	2.16e-05	Down	gi|326501558|dbj|BAK02568.1| predicted protein [Hordeum vulgare subsp. vulgare]	_	molecular_function:zinc ion binding(GO:0008270)
TRIAE_CS42_2DS_TGACv1_179210_AA0605250	6905	49	0.56	37	0.37	51	0.56	97	1.09	105	1.15	121	1.37	77.0891	1.04248	0.205028	5.08459	3.68e-07	2.19e-05	Ups	gi|475621282|gb|EMT31420.1| Wall-associated receptor kinase 2 [Aegilops tauschii]	_	_
TRIAE_CS42_1BL_TGACv1_031822_AA0121110	1239	19	0.67	21	0.65	22	0.75	59	2.08	66	2.26	62	2.18	41.6995	1.18207	0.232558	5.08289	3.72e-07	2.21e-05	Ups	gi|475595610|gb|EMT23096.1| RING-H2 finger protein ATL3F [Aegilops tauschii]	K10664	_
TRIAE_CS42_5DL_TGACv1_433216_AA1405750	4627	84	1.61	138	2.31	91	1.68	26	0.49	22	0.41	51	0.97	66.8218	-1.15445	0.227435	-5.07595	3.86e-07	2.28e-05	Down	gi|473754439|gb|EMS45672.1| Protein TRANSPARENT TESTA 12 [Triticum urartu]	K03327	biological_process:drug transmembrane transport(GO:0006855);cellular_component:membrane(GO:0016020);molecular_function:antiporter activity(GO:0015297);molecular_function:drug transmembrane transporter activity(GO:0015238)
TRIAE_CS42_1BS_TGACv1_050226_AA0169180	752	10	0.55	32	1.54	13	0.69	74	4.03	53	2.8	65	3.54	41.2134	1.23443	0.244915	5.04025	4.65e-07	2.7e-05	Ups	gi|475511886|gb|EMT05441.1| hypothetical protein F775_31285 [Aegilops tauschii]	_	_
TRIAE_CS42_1AL_TGACv1_001965_AA0037320	729	72	4.46	140	7.61	136	8.12	14	0.86	35	2.09	51	3.14	72.6586	-1.19344	0.236802	-5.03984	4.66e-07	2.7e-05	Down	gi|326491863|dbj|BAJ98156.1| predicted protein [Hordeum vulgare subsp. vulgare]<>gi|326508412|dbj|BAJ99473.1| predicted protein [Hordeum vulgare subsp. vulgare]	_	_
TRIAE_CS42_5AL_TGACv1_375844_AA1227890	860	142	6.81	182	7.66	291	13.46	55	2.62	79	3.65	102	4.86	139.627	-1.04595	0.208135	-5.02535	5.03e-07	2.89e-05	Down		_	_
TRIAE_CS42_3B_TGACv1_221569_AA0744480	5109	26	0.18	61	0.37	75	0.5	143	0.98	195	1.29	99	0.68	99.8342	1.12492	0.223909	5.02402	5.06e-07	2.9e-05	Ups	gi|669027328|emb|CDM80650.1| unnamed protein product [Triticum aestivum]	_	_
TRIAE_CS42_3B_TGACv1_224955_AA0803590	1247	12	0.4	28	0.81	12	0.38	72	2.36	63	2.01	46	1.51	38.8733	1.22903	0.244648	5.02365	5.07e-07	2.9e-05	Ups	gi|326490682|dbj|BAJ90008.1| predicted protein [Hordeum vulgare subsp. vulgare]	_	_
TRIAE_CS42_5DL_TGACv1_433481_AA1414390	761	95	5.15	146	6.94	124	6.48	27	1.45	67	3.5	25	1.34	78.6028	-1.13721	0.226604	-5.0185	5.21e-07	2.97e-05	Down	gi|475599902|gb|EMT24362.1| Non-specific lipid-transfer protein-like protein [Aegilops tauschii]	_	_
TRIAE_CS42_7AS_TGACv1_569860_AA1825620	6129	8	0.07	14	0.11	7	0.06	45	0.41	36	0.32	44	0.4	25.8192	1.27002	0.253285	5.01417	5.33e-07	3.03e-05	Ups	gi|475571995|gb|EMT16397.1| hypothetical protein F775_20633 [Aegilops tauschii]	_	_
TRIAE_CS42_4BL_TGACv1_320961_AA1052590	4046	667	11.15	1335	19.57	1080	17.4	329	5.45	445	7.17	371	6.15	685.762	-1.0583	0.211165	-5.01173	5.39e-07	3.06e-05	Down	gi|1279876|gb|AAA97952.1| high affinity sulfate transporter HVST1 [Hordeum vulgare subsp. vulgare]	K17470	cellular_component:integral component of membrane(GO:0016021);molecular_function:secondary active sulfate transmembrane transporter activity(GO:0008271);biological_process:sulfate transport(GO:0008272);biological_process:transmembrane transport(GO:0055085)
TRIAE_CS42_1BL_TGACv1_030469_AA0091840	1659	84	2.51	118	3.09	118	3.4	44	1.3	39	1.12	42	1.24	72.6893	-1.02796	0.205142	-5.01095	5.42e-07	3.07e-05	Down	gi|473735686|gb|EMS45259.1| O-methyltransferase ZRP4 [Triticum urartu]	_	_
TRIAE_CS42_2DS_TGACv1_177400_AA0575670	1963	184	1.44	434	2.98	319	2.41	935	7.26	847	6.4	762	5.92	580.13	1.133	0.226348	5.00554	5.57e-07	3.14e-05	Ups	gi|514808502|ref|XP_004979089.1| PREDICTED: xylanase inhibitor protein 1-like [Setaria italica]<>gi|944229864|gb|KQK94250.1| hypothetical protein SETIT_026675mg [Setaria italica]	K01183	biological_process:carbohydrate metabolic process(GO:0005975);biological_process:single-organism cellular process(GO:0044763);molecular_function:hydrolase activity(GO:0016787);molecular_function:hydrolase activity, hydrolyzing O-glycosyl compounds(GO:0004553);biological_process:xylan catabolic process(GO:0045493);cellular_component:cytoplasmic membrane-bounded vesicle(GO:0016023);biological_proce…
TRIAE_CS42_5AL_TGACv1_375436_AA1221540	1980	33	0.69	53	0.97	54	1.08	13	0.27	6	0.12	10	0.21	27.4166	-1.26746	0.2534	-5.0018	5.68e-07	3.19e-05	Down	gi|474113618|gb|EMS55742.1| UDP-glycosyltransferase 73C5 [Triticum urartu]	_	_
TRIAE_CS42_3AS_TGACv1_211520_AA0691010	2784	119	2.23	102	1.68	69	1.25	27	0.5	37	0.67	36	0.67	63.8884	-1.10769	0.221533	-5.00012	5.73e-07	3.21e-05	Down	gi|1000816937|gb|AML47762.1| putative polygalacturonase [Triticum aestivum]	_	molecular_function:polygalacturonase activity(GO:0004650);biological_process:carbohydrate metabolic process(GO:0005975)
TRIAE_CS42_1AL_TGACv1_003185_AA0048590	2915	11	0.31	14	0.34	14	0.38	41	1.14	51	1.37	51	1.41	30.5094	1.23376	0.24698	4.99539	5.87e-07	3.28e-05	Ups	gi|326508674|dbj|BAJ95859.1| predicted protein [Hordeum vulgare subsp. vulgare]	_	molecular_function:iron ion binding(GO:0005506);molecular_function:electron carrier activity(GO:0009055);molecular_function:iron-sulfur cluster binding(GO:0051536);cellular_component:chloroplast(GO:0009507)
TRIAE_CS42_3DL_TGACv1_250962_AA0875520	2795	20	0.34	39	0.57	36	0.58	94	1.56	74	1.2	81	1.35	57.4299	1.10428	0.222218	4.96937	6.72e-07	3.68e-05	Ups	gi|475404229|gb|EMT00830.1| Peptide transporter PTR2 [Aegilops tauschii]	K14638	biological_process:response to nematode(GO:0009624);biological_process:transport(GO:0006810);cellular_component:plasma membrane(GO:0005886);molecular_function:transporter activity(GO:0005215)
TRIAE_CS42_5DL_TGACv1_433469_AA1413860	1848	14	0.31	31	0.61	25	0.54	53	1.17	101	2.17	65	1.44	48.1652	1.18266	0.238436	4.96009	7.05e-07	3.83e-05	Ups	gi|1002297201|ref|XP_015612026.1| PREDICTED: uncharacterized protein LOC4347696 [Oryza sativa Japonica Group]<>gi|50726586|dbj|BAD34220.1| unknown protein [Oryza sativa Japonica Group]<>gi|113632015|dbj|BAF25696.1| Os09g0535900 [Oryza sativa Japonica Group]<>gi|125564504|gb|EAZ09884.1| hypothetical protein OsI_32177 [Oryza sativa Indica Group]<>gi|125606452|gb|EAZ45488.1| hypothetical protein OsJ…	_	biological_process:lipid metabolic process(GO:0006629);molecular_function:phosphoric diester hydrolase activity(GO:0008081)
TRIAE_CS42_2BS_TGACv1_146159_AA0457120	2119	83	1.62	101	1.73	113	2.12	42	0.81	29	0.54	40	0.77	66.803	-1.05374	0.212617	-4.95604	7.19e-07	3.89e-05	Down	gi|326513946|dbj|BAJ92123.1| predicted protein [Hordeum vulgare subsp. vulgare]<>gi|326522945|dbj|BAJ88518.1| predicted protein [Hordeum vulgare subsp. vulgare]	_	_
TRIAE_CS42_3DL_TGACv1_250362_AA0866840	2622	36	0.59	51	0.73	45	0.71	96	1.56	141	2.23	81	1.32	74.9652	1.05001	0.212119	4.95007	7.42e-07	3.99e-05	Ups	gi|475478296|gb|EMT02725.1| hypothetical protein F775_13361 [Aegilops tauschii]	_	_
TRIAE_CS42_2BS_TGACv1_145894_AA0448420	1795	63	1.72	78	1.87	61	1.6	25	0.68	16	0.42	21	0.57	43.0195	-1.15376	0.23322	-4.94706	7.53e-07	4.04e-05	Down	gi|475527729|gb|EMT07518.1| Peroxidase 2 [Aegilops tauschii]	K00430	_
TRIAE_CS42_5AL_TGACv1_378277_AA1252490	1776	10	0.23	19	0.39	7	0.16	50	1.15	31	0.69	74	1.71	32.0512	1.2572	0.254229	4.94516	7.61e-07	4.08e-05	Ups	gi|326515048|dbj|BAJ99885.1| predicted protein [Hordeum vulgare subsp. vulgare]	_	_
TRIAE_CS42_2AL_TGACv1_093047_AA0270330	10597	92	4.15	121	4.79	154	6.7	39	1.75	30	1.31	62	2.78	81.5351	-1.08032	0.218557	-4.94298	7.69e-07	4.11e-05	Down	gi|326511371|dbj|BAJ87699.1| predicted protein [Hordeum vulgare subsp. vulgare]	_	_
TRIAE_CS42_7DL_TGACv1_603951_AA1991560	1805	56	1.28	36	0.72	44	0.97	134	3.04	120	2.64	81	1.84	78.9546	1.05581	0.214266	4.92755	8.33e-07	4.39e-05	Ups	gi|326505412|dbj|BAJ95377.1| predicted protein [Hordeum vulgare subsp. vulgare]	_	molecular_function:transferase activity, transferring hexosyl groups(GO:0016758);biological_process:metabolic process(GO:0008152)
TRIAE_CS42_2DL_TGACv1_160390_AA0550030	1285	25	0.99	42	1.45	25	0.95	82	3.21	194	7.38	49	1.92	69.4179	1.2153	0.246739	4.92547	8.42e-07	4.42e-05	Ups	gi|475611106|gb|EMT27976.1| hypothetical protein F775_43817 [Aegilops tauschii]	_	biological_process:metal ion transport(GO:0030001);molecular_function:metal ion binding(GO:0046872)
TRIAE_CS42_1AS_TGACv1_019383_AA0065910	9742	389	1.34	449	1.36	424	1.41	1526	5.23	1002	3.33	771	2.64	763.01	1.09656	0.22275	4.92282	8.53e-07	4.47e-05	Ups	gi|1002270009|ref|XP_015639342.1| PREDICTED: isovaleryl-CoA dehydrogenase, mitochondrial [Oryza sativa Japonica Group]<>gi|75326460|sp|Q75IM9.2|IVD_ORYSJ RecName: Full=Isovaleryl-CoA dehydrogenase, mitochondrial; Short=IVD; Flags: Precursor<>gi|47900455|gb|AAT39231.1| putative isovaleryl-CoA dehydrogenase [Oryza sativa Japonica Group]<>gi|57863927|gb|AAS90672.2| putative isovaleryl-CoA dehydrogen…	K00253	_
TRIAE_CS42_3B_TGACv1_223177_AA0777480	19969	34	0.36	53	0.49	21	0.21	81	0.84	121	1.22	84	0.87	65.5565	1.10486	0.224814	4.91455	8.9e-07	4.63e-05	Ups	gi|326496619|dbj|BAJ98336.1| predicted protein, partial [Hordeum vulgare subsp. vulgare]	_	biological_process:protein phosphorylation(GO:0006468);molecular_function:ATP binding(GO:0005524);molecular_function:protein serine/threonine kinase activity(GO:0004674)
TRIAE_CS42_5DL_TGACv1_433270_AA1407690	2264	49	1.05	33	0.62	48	0.99	10	0.21	5	0.1	11	0.23	25.6619	-1.25371	0.255342	-4.90993	9.11e-07	4.72e-05	Down	gi|326501968|dbj|BAK06476.1| predicted protein [Hordeum vulgare subsp. vulgare]	K09419	_
TRIAE_CS42_4BL_TGACv1_320953_AA1052350	1412	76	2.51	99	2.86	66	2.1	19	0.62	25	0.79	35	1.14	52.0683	-1.11847	0.228009	-4.90538	9.32e-07	4.82e-05	Down	gi|1002266351|ref|XP_015637505.1| PREDICTED: protein LURP-one-related 8 [Oryza sativa Japonica Group]<>gi|113578712|dbj|BAF17075.1| Os05g0311500 [Oryza sativa Japonica Group]<>gi|222631067|gb|EEE63199.1| hypothetical protein OsJ_18009 [Oryza sativa Japonica Group]<>gi|937918374|dbj|BAS93292.1| Os05g0311500 [Oryza sativa Japonica Group]	_	biological_process:cellular metabolic process(GO:0044237)
TRIAE_CS42_1AL_TGACv1_000149_AA0004700	667	38	2.35	75	4.07	50	2.98	130	7.97	142	8.47	95	5.83	88.0744	1.0058	0.205061	4.90487	9.35e-07	4.82e-05	Ups	gi|475511247|gb|EMT05374.1| hypothetical protein F775_44008 [Aegilops tauschii]	_	_
TRIAE_CS42_4BS_TGACv1_328309_AA1086040	3104	95	2.68	99	2.45	112	3.04	38	1.06	44	1.2	41	1.15	70.3783	-1.00179	0.204875	-4.88976	1.01e-06	5.17e-05	Down	gi|473996694|gb|EMS52090.1| hypothetical protein TRIUR3_21512 [Triticum urartu]	_	_
TRIAE_CS42_2AS_TGACv1_113283_AA0353910	1135	58	2.11	46	1.47	47	1.65	8	0.29	14	0.49	15	0.54	30.814	-1.21651	0.249112	-4.88339	1.04e-06	5.31e-05	Down	gi|475626109|gb|EMT33204.1| hypothetical protein F775_43811 [Aegilops tauschii]	_	_
TRIAE_CS42_2BL_TGACv1_130980_AA0420860	2569	33	0.62	31	0.51	44	0.8	3	0.06	4	0.07	10	0.19	20.4382	-1.26065	0.258201	-4.88245	1.05e-06	5.33e-05	Down	gi|357168089|ref|XP_003581477.1| PREDICTED: cationic amino acid transporter 6, chloroplastic-like [Brachypodium distachyon]<>gi|944048231|gb|KQJ83872.1| hypothetical protein BRADI_5g17290 [Brachypodium distachyon]	_	biological_process:amino acid transmembrane transport(GO:0003333);molecular_function:amino acid transmembrane transporter activity(GO:0015171);cellular_component:integral component of membrane(GO:0016021)
TRIAE_CS42_3DS_TGACv1_272073_AA0914210	1004	7	0.29	12	0.43	13	0.51	55	2.24	26	1.03	58	2.37	28.7754	1.24171	0.254758	4.87407	1.09e-06	5.53e-05	Ups		_	_
TRIAE_CS42_4AS_TGACv1_306948_AA1015400	3113	37	0.52	60	0.74	58	0.78	6	0.08	17	0.23	13	0.18	30.9603	-1.22321	0.251156	-4.87034	1.11e-06	5.62e-05	Down	gi|475587989|gb|EMT20723.1| 3-ketoacyl-CoA synthase 6 [Aegilops tauschii]	K15397	cellular_component:membrane(GO:0016020);biological_process:fatty acid biosynthetic process(GO:0006633);molecular_function:transferase activity, transferring acyl groups other than amino-acyl groups(GO:0016747)
TRIAE_CS42_4AS_TGACv1_306580_AA1010510	6339	1377	10.14	2848	18.4	2283	16.21	853	6.23	907	6.44	732	5.35	1460.2	-1.02503	0.210547	-4.86841	1.12e-06	5.66e-05	Down	gi|721624663|ref|XP_010229044.1| PREDICTED: sulfate transporter 1.2-like [Brachypodium distachyon]<>gi|944087793|gb|KQK23145.1| hypothetical protein BRADI_1g71500 [Brachypodium distachyon]<>gi|944087794|gb|KQK23146.1| hypothetical protein BRADI_1g71500 [Brachypodium distachyon]<>gi|944087795|gb|KQK23147.1| hypothetical protein BRADI_1g71500 [Brachypodium distachyon]	K17470	cellular_component:integral component of membrane(GO:0016021);molecular_function:secondary active sulfate transmembrane transporter activity(GO:0008271);biological_process:sulfate transport(GO:0008272);biological_process:transmembrane transport(GO:0055085)
TRIAE_CS42_7DS_TGACv1_622767_AA2045020	4057	57	0.66	25	0.25	49	0.55	92	1.06	152	1.7	106	1.22	80.7613	1.09137	0.224271	4.86629	1.14e-06	5.71e-05	Ups	gi|326491403|dbj|BAJ94179.1| predicted protein [Hordeum vulgare subsp. vulgare]	_	biological_process:pentose-phosphate shunt, non-oxidative branch(GO:0009052);molecular_function:ribose-5-phosphate isomerase activity(GO:0004751)
TRIAE_CS42_4DL_TGACv1_344468_AA1147440	1205	36	1.23	62	1.86	21	0.69	8	0.27	7	0.23	3	0.1	21.9141	-1.257	0.258314	-4.86617	1.14e-06	5.71e-05	Down	gi|987312900|gb|AMD78108.1| heat-responsive transcription factor HSF85 [Triticum aestivum]	K09419	molecular_function:sequence-specific DNA binding transcription factor activity(GO:0003700);molecular_function:sequence-specific DNA binding(GO:0043565);cellular_component:nucleus(GO:0005634);biological_process:regulation of transcription, DNA-templated(GO:0006355)
TRIAE_CS42_7BL_TGACv1_577128_AA1866750	6679	27	0.27	55	0.49	46	0.45	115	1.15	179	1.74	65	0.65	81.0418	1.1246	0.231485	4.85821	1.18e-06	5.9e-05	Ups	gi|474311726|gb|EMS61936.1| Pleiotropic drug resistance protein 4 [Triticum urartu]	_	;molecular_function:ATP binding(GO:0005524);molecular_function:ATPase activity(GO:0016887);cellular_component:membrane(GO:0016020)
TRIAE_CS42_6DL_TGACv1_526389_AA1681780	1052	19	0.84	21	0.82	24	1.03	75	3.3	56	2.39	56	2.46	42.067	1.13586	0.234737	4.83886	1.31e-06	6.44e-05	Ups	gi|326530302|dbj|BAJ97577.1| predicted protein [Hordeum vulgare subsp. vulgare]	K14484	biological_process:cellular process(GO:0009987)
TRIAE_CS42_6BL_TGACv1_499915_AA1594630	11089	27	0.42	39	0.53	24	0.36	79	1.2	67	0.99	84	1.28	53.4187	1.07502	0.222584	4.82971	1.37e-06	6.7e-05	Ups	gi|326497061|dbj|BAK02115.1| predicted protein [Hordeum vulgare subsp. vulgare]	K09753	biological_process:cellular metabolic process(GO:0044237);molecular_function:nucleotide binding(GO:0000166);molecular_function:coenzyme binding(GO:0050662);molecular_function:catalytic activity(GO:0003824)
TRIAE_CS42_6AL_TGACv1_472885_AA1526950	2353	45	0.79	74	1.14	89	1.5	23	0.4	22	0.37	16	0.28	43.802	-1.15505	0.239316	-4.82646	1.39e-06	6.78e-05	Down	gi|326525961|dbj|BAJ93157.1| predicted protein [Hordeum vulgare subsp. vulgare]	_	_
TRIAE_CS42_1BL_TGACv1_030731_AA0099330	2719	46	1.3	48	1.19	48	1.3	13	0.36	12	0.33	11	0.31	29.0664	-1.19569	0.248142	-4.81856	1.45e-06	7.04e-05	Down	gi|475530770|gb|EMT07953.1| hypothetical protein F775_21580 [Aegilops tauschii]	_	_
TRIAE_CS42_6BL_TGACv1_500105_AA1598950	1369	132	4.63	95	2.92	121	4.09	42	1.46	39	1.32	57	1.98	80.1698	-1.00843	0.209314	-4.81778	1.45e-06	7.06e-05	Down		_	_
TRIAE_CS42_4BL_TGACv1_321295_AA1058570	5236	64	1.26	147	2.54	89	1.69	26	0.51	43	0.82	31	0.61	64.5065	-1.09567	0.227701	-4.81186	1.5e-06	7.24e-05	Down	gi|573924876|ref|XP_006649998.1| PREDICTED: CBL-interacting protein kinase 31 [Oryza brachyantha]	K07198	biological_process:protein phosphorylation(GO:0006468);molecular_function:ATP binding(GO:0005524);biological_process:signal transduction(GO:0007165);molecular_function:protein serine/threonine kinase activity(GO:0004674);cellular_component:mitochondrion(GO:0005739)
TRIAE_CS42_5AL_TGACv1_378765_AA1254470	3619	23	0.35	68	0.91	62	0.92	137	2.08	123	1.82	109	1.66	86.8778	1.04182	0.217191	4.79679	1.61e-06	7.74e-05	Ups	gi|326520371|dbj|BAK07444.1| predicted protein [Hordeum vulgare subsp. vulgare]	_	biological_process:transmembrane transport(GO:0055085)
TRIAE_CS42_2BL_TGACv1_131336_AA0426230	2545	60	1.75	122	3.13	71	2	32	0.93	27	0.76	24	0.7	54.2687	-1.10095	0.229602	-4.79504	1.63e-06	7.8e-05	Down	gi|326491425|dbj|BAJ94190.1| predicted protein [Hordeum vulgare subsp. vulgare]<>gi|326508638|dbj|BAJ95841.1| predicted protein [Hordeum vulgare subsp. vulgare]	K13348	cellular_component:integral component of membrane(GO:0016021)
TRIAE_CS42_7AS_TGACv1_569165_AA1808950	2349	54	0.68	73	0.81	111	1.35	25	0.31	26	0.32	24	0.3	51.2135	-1.12449	0.234674	-4.7917	1.65e-06	7.9e-05	Down	gi|475526198|gb|EMT07270.1| hypothetical protein F775_19272 [Aegilops tauschii]	_	_
TRIAE_CS42_1DS_TGACv1_080163_AA0241930	3522	5	0.11	8	0.15	16	0.34	46	1	43	0.91	36	0.78	25.8775	1.21997	0.255047	4.78333	1.72e-06	8.17e-05	Ups	gi|669027776|emb|CDM81337.1| unnamed protein product [Triticum aestivum]	K09755	molecular_function:metal ion binding(GO:0046872);molecular_function:oxidoreductase activity(GO:0016491)
TRIAE_CS42_4AS_TGACv1_307370_AA1019910	1123	28	1.03	74	2.38	78	2.76	12	0.44	12	0.42	18	0.66	35.8728	-1.20383	0.251901	-4.77898	1.76e-06	8.32e-05	Down	gi|670363136|ref|XP_008654710.1| PREDICTED: uncharacterized protein LOC100501075 [Zea mays]<>gi|16588985|gb|AAL26975.1|AF374405_1 long cell-linked locus protein [Zea mays]<>gi|414866414|tpg|DAA44971.1| TPA: cell-linked locus protein [Zea mays]	_	_
TRIAE_CS42_6AL_TGACv1_472264_AA1520170	6289	5	0.12	9	0.19	10	0.24	48	1.17	25	0.59	40	0.97	23.052	1.22486	0.256923	4.76743	1.87e-06	8.71e-05	Ups	gi|357136787|ref|XP_003569985.1| PREDICTED: aldehyde dehydrogenase family 3 member F1-like [Brachypodium distachyon]<>gi|944064954|gb|KQK00545.1| hypothetical protein BRADI_3g50200 [Brachypodium distachyon]	K00128	molecular_function:aldehyde dehydrogenase [NAD(P)+] activity(GO:0004030);cellular_component:membrane(GO:0016020);cellular_component:endoplasmic reticulum(GO:0005783);biological_process:cellular aldehyde metabolic process(GO:0006081);biological_process:oxidation-reduction process(GO:0055114)
TRIAE_CS42_1DL_TGACv1_062823_AA0220500	925	78	3.9	98	4.3	82	3.95	19	0.94	36	1.74	37	1.84	57.092	-1.06089	0.222696	-4.76385	1.9e-06	8.85e-05	Down	gi|632800122|gb|AHZ35571.1| LEA protein [Triticum aestivum]<>gi|873167304|gb|AKP24036.1| late embryogenesis abundant protein group 3 [Triticum aestivum]	_	_
TRIAE_CS42_3DL_TGACv1_254806_AA0896680	4231	1070	15.17	1047	13.02	754	10.3	262	3.68	371	5.07	464	6.53	649.625	-1.02332	0.215115	-4.7571	1.96e-06	9.1e-05	Down	gi|1002236262|ref|XP_015622327.1| PREDICTED: phosphoethanolamine N-methyltransferase 1 [Oryza sativa Japonica Group]<>gi|113533488|dbj|BAF05871.1| Os01g0695100 [Oryza sativa Japonica Group]	K05929	molecular_function:phosphoethanolamine N-methyltransferase activity(GO:0000234);biological_process:phosphatidylcholine biosynthetic process(GO:0006656);biological_process:choline biosynthetic process(GO:0042425);biological_process:methylation(GO:0032259);biological_process:pollen tube growth(GO:0009860);biological_process:pollen development(GO:0009555);biological_process:pollen tube guidance(GO:0…
TRIAE_CS42_3AS_TGACv1_212907_AA0704050	1964	6	0.13	9	0.17	5	0.11	35	0.76	30	0.63	33	0.72	19.8133	1.22432	0.257429	4.75594	1.98e-06	9.14e-05	Ups	gi|475553517|gb|EMT12033.1| Hexose carrier protein HEX6 [Aegilops tauschii]	_	molecular_function:substrate-specific transmembrane transporter activity(GO:0022891);cellular_component:integral component of membrane(GO:0016021);biological_process:transmembrane transport(GO:0055085)
TRIAE_CS42_1BL_TGACv1_030930_AA0103950	1491	19	0.58	49	1.3	22	0.64	71	2.13	84	2.45	86	2.59	55.0269	1.09068	0.23068	4.72811	2.27e-06	0.000103214	Ups	gi|475600098|gb|EMT24434.1| hypothetical protein F775_32163 [Aegilops tauschii]	K00799	molecular_function:glutathione transferase activity(GO:0004364);biological_process:de-etiolation(GO:0009704);biological_process:lateral root development(GO:0048527);biological_process:response to cadmium ion(GO:0046686);biological_process:response to growth hormone(GO:0060416);cellular_component:chloroplast(GO:0009507);biological_process:response to karrikin(GO:0080167)
TRIAE_CS42_2BS_TGACv1_146639_AA0469920	1815	50	1.58	94	2.6	85	2.58	25	0.78	31	0.94	10	0.31	47.7912	-1.14481	0.242176	-4.72718	2.28e-06	0.000103502	Down	gi|193074379|gb|ACF08095.1| class III peroxidase [Triticum aestivum]	K00430	molecular_function:heme binding(GO:0020037);molecular_function:metal ion binding(GO:0046872);molecular_function:peroxidase activity(GO:0004601);biological_process:oxidation-reduction process(GO:0055114);biological_process:response to oxidative stress(GO:0006979)
TRIAE_CS42_2BL_TGACv1_132584_AA0438520	2109	41	1.3	42	1.17	67	2.05	10	0.32	18	0.55	3	0.09	29.5927	-1.20991	0.256145	-4.72355	2.32e-06	0.000104846	Down	gi|357164674|ref|XP_003580130.1| PREDICTED: protein CUP-SHAPED COTYLEDON 1-like [Brachypodium distachyon]<>gi|944047932|gb|KQJ83573.1| hypothetical protein BRADI_5g15587 [Brachypodium distachyon]	_	molecular_function:DNA binding(GO:0003677);biological_process:regulation of transcription, DNA-templated(GO:0006355)
TRIAE_CS42_5DL_TGACv1_433831_AA1423290	3088	60	0.83	84	1.02	77	1.03	26	0.36	29	0.39	22	0.3	48.5672	-1.06726	0.226107	-4.72016	2.36e-06	0.00010601	Down		_	_
TRIAE_CS42_7BL_TGACv1_578194_AA1890920	1980	2	0.05	17	0.37	3	0.07	34	0.85	55	1.33	33	0.82	23.9937	1.21949	0.258369	4.71997	2.36e-06	0.000106035	Ups	gi|473786878|gb|EMS46232.1| Secologanin synthase [Triticum urartu]	_	biological_process:brassinosteroid metabolic process(GO:0016131);molecular_function:electron carrier activity(GO:0009055);molecular_function:monooxygenase activity(GO:0004497);molecular_function:iron ion binding(GO:0005506);biological_process:unidimensional cell growth(GO:0009826);molecular_function:heme binding(GO:0020037);molecular_function:oxidoreductase activity, acting on paired donors, with…
TRIAE_CS42_3B_TGACv1_224063_AA0791830	1307	79	1.32	92	1.35	69	1.11	30	0.5	30	0.48	29	0.48	53.7203	-1.03374	0.219197	-4.71603	2.4e-06	0.000107657	Down	gi|669031657|emb|CDM86756.1| unnamed protein product [Triticum aestivum]	K09419	molecular_function:sequence-specific DNA binding transcription factor activity(GO:0003700);molecular_function:sequence-specific DNA binding(GO:0043565);cellular_component:nucleus(GO:0005634);biological_process:regulation of transcription, DNA-templated(GO:0006355)
TRIAE_CS42_7AL_TGACv1_556845_AA1771970	1329	102	3.7	69	2.2	93	3.25	26	0.94	43	1.5	14	0.5	57.1203	-1.11827	0.237439	-4.70972	2.48e-06	0.000110504	Down	gi|444289172|gb|AGD95022.1| secretory phospholipase A2 [Triticum turgidum subsp. durum]	K01047	molecular_function:phospholipase A2 activity(GO:0004623);biological_process:phospholipid metabolic process(GO:0006644);biological_process:lipid catabolic process(GO:0016042)
TRIAE_CS42_4DL_TGACv1_343497_AA1135390	1285	16	0.62	14	0.48	5	0.19	44	1.69	38	1.42	54	2.08	28.7245	1.18979	0.253045	4.7019	2.58e-06	0.000114267	Ups	gi|475561348|gb|EMT13765.1| hypothetical protein F775_32808 [Aegilops tauschii]	_	_
TRIAE_CS42_5BL_TGACv1_405586_AA1330970	1229	23	0.97	59	2.18	31	1.26	67	2.8	138	5.6	98	4.09	69.0738	1.08697	0.231345	4.69847	2.62e-06	0.000115909	Ups		_	_
TRIAE_CS42_5DL_TGACv1_433327_AA1409880	2424	28	0.63	59	1.17	39	0.85	87	1.95	151	3.29	79	1.77	73.5892	1.05272	0.224338	4.69255	2.7e-06	0.000118796	Ups	gi|475605773|gb|EMT26195.1| Putative serine/threonine-protein kinase NAK [Aegilops tauschii]	K00924	biological_process:protein phosphorylation(GO:0006468);molecular_function:ATP binding(GO:0005524);molecular_function:protein serine/threonine kinase activity(GO:0004674);cellular_component:plastid(GO:0009536)
TRIAE_CS42_7BL_TGACv1_577127_AA1866660	1427	14	0.44	48	1.31	35	1.05	79	2.44	104	3.13	77	2.38	59.346	1.08113	0.232067	4.65867	3.18e-06	0.000136473	Ups	gi|62861391|gb|AAY16797.1| cold acclimation induced protein 2-1 [Triticum aestivum]	_	molecular_function:copper ion binding(GO:0005507);molecular_function:electron carrier activity(GO:0009055)
TRIAE_CS42_6AL_TGACv1_473573_AA1531830	1159	23	0.91	52	1.81	26	0.99	95	3.74	69	2.64	92	3.62	59.437	1.05502	0.226665	4.65453	3.25e-06	0.000138819	Ups	gi|326530302|dbj|BAJ97577.1| predicted protein [Hordeum vulgare subsp. vulgare]	K14484	biological_process:primary metabolic process(GO:0044238);biological_process:cellular macromolecule biosynthetic process(GO:0034645);biological_process:regulation of cellular process(GO:0050794);biological_process:gene expression(GO:0010467)
TRIAE_CS42_7BL_TGACv1_577330_AA1872310	1085	56	2.58	63	2.55	47	2.09	10	0.46	24	1.07	11	0.5	34.3338	-1.15075	0.247234	-4.65448	3.25e-06	0.000138819	Down	gi|960460888|ref|XP_014753152.1| PREDICTED: peroxidase P7-like isoform X1 [Brachypodium distachyon]<>gi|944082703|gb|KQK18055.1| hypothetical protein BRADI_1g38310 [Brachypodium distachyon]	K00430	molecular_function:metal ion binding(GO:0046872);biological_process:response to oxidative stress(GO:0006979);cellular_component:cytoplasmic membrane-bounded vesicle(GO:0016023);molecular_function:heme binding(GO:0020037);molecular_function:peroxidase activity(GO:0004601);biological_process:oxidation-reduction process(GO:0055114)
TRIAE_CS42_3DL_TGACv1_250658_AA0871770	3099	77	0.9	49	0.5	49	0.55	15	0.17	20	0.23	15	0.17	37.0305	-1.13867	0.244805	-4.65132	3.3e-06	0.000140402	Down	gi|326501558|dbj|BAK02568.1| predicted protein [Hordeum vulgare subsp. vulgare]	_	molecular_function:zinc ion binding(GO:0008270)
TRIAE_CS42_7DS_TGACv1_622464_AA2040110	1684	74	1.91	160	3.62	152	3.78	64	1.64	43	1.07	23	0.59	83.717	-1.07307	0.230763	-4.65012	3.32e-06	0.000141033	Down	gi|326521574|dbj|BAK00363.1| predicted protein, partial [Hordeum vulgare subsp. vulgare]	K07735	cellular_component:plastid(GO:0009536)
TRIAE_CS42_5AS_TGACv1_392939_AA1266520	3992	7	0.08	33	0.35	20	0.23	60	0.71	74	0.85	57	0.67	41.7607	1.13934	0.245807	4.63511	3.57e-06	0.000150293	Ups	gi|61656787|emb|CAH10048.1| Cell Division Protein AAA ATPase family [Triticum aestivum]<>gi|109450904|emb|CAJ13544.1| unnamed protein product [Triticum aestivum]	K08900	molecular_function:nucleoside-triphosphatase activity(GO:0017111);molecular_function:ATP binding(GO:0005524);biological_process:cell division(GO:0051301)
TRIAE_CS42_U_TGACv1_641462_AA2095730	3763	48	0.55	69	0.69	75	0.82	17	0.19	14	0.15	27	0.31	40.7672	-1.11467	0.240571	-4.63345	3.6e-06	0.000150885	Down	gi|326498283|dbj|BAJ98569.1| predicted protein [Hordeum vulgare subsp. vulgare]<>gi|326526485|dbj|BAJ97259.1| predicted protein [Hordeum vulgare subsp. vulgare]	_	biological_process:transport(GO:0006810);cellular_component:membrane(GO:0016020);molecular_function:transporter activity(GO:0005215)
TRIAE_CS42_4DL_TGACv1_342382_AA1112050	2059	91	2.37	97	2.22	106	2.66	41	1.06	23	0.58	48	1.24	66.6056	-1.01023	0.218455	-4.62443	3.76e-06	0.000156576	Down	gi|475609053|gb|EMT27247.1| Auxin-induced protein 5NG4 [Aegilops tauschii]	_	cellular_component:membrane(GO:0016020)
TRIAE_CS42_1AS_TGACv1_019165_AA0061960	2231	14	0.33	24	0.5	22	0.5	37	0.87	71	1.62	78	1.83	41.1085	1.12374	0.243806	4.60915	4.04e-06	0.000166909	Ups	gi|473884725|gb|EMS48067.1| Subtilisin-chymotrypsin inhibitor-2A [Triticum urartu]	_	molecular_function:serine-type endopeptidase inhibitor activity(GO:0004867);biological_process:response to wounding(GO:0009611)
TRIAE_CS42_7BS_TGACv1_591972_AA1927090	1433	66	2.01	147	3.93	136	4	40	1.21	45	1.32	48	1.45	78.2712	-1.00323	0.217822	-4.60574	4.11e-06	0.000169234	Down	gi|326521574|dbj|BAK00363.1| predicted protein, partial [Hordeum vulgare subsp. vulgare]	K07735	_
TRIAE_CS42_2DL_TGACv1_160846_AA0554620	2469	17	0.31	34	0.55	40	0.71	3	0.05	7	0.12	2	0.04	16.6257	-1.18592	0.2575	-4.60551	4.11e-06	0.000169314	Down	gi|326525511|dbj|BAJ88802.1| predicted protein [Hordeum vulgare subsp. vulgare]<>gi|326527943|dbj|BAJ89023.1| predicted protein [Hordeum vulgare subsp. vulgare]<>gi|326532670|dbj|BAJ89180.1| predicted protein [Hordeum vulgare subsp. vulgare]<>gi|326534338|dbj|BAJ89519.1| predicted protein [Hordeum vulgare subsp. vulgare]	K15398	molecular_function:heme binding(GO:0020037);molecular_function:oxidoreductase activity, acting on paired donors, with incorporation or reduction of molecular oxygen(GO:0016705);molecular_function:monooxygenase activity(GO:0004497);molecular_function:iron ion binding(GO:0005506);molecular_function:electron carrier activity(GO:0009055);biological_process:oxidation-reduction process(GO:0055114)
TRIAE_CS42_4AS_TGACv1_306410_AA1007730	964	81	3.47	87	3.27	101	4.17	22	0.93	36	1.48	43	1.83	60.6526	-1.01669	0.221224	-4.59575	4.31e-06	0.000175974	Down	gi|669028304|emb|CDM82060.1| unnamed protein product [Triticum aestivum]	_	_
TRIAE_CS42_3B_TGACv1_220874_AA0722110	684	72	4.34	45	2.38	91	5.29	4	0.24	26	1.51	20	1.2	42.5263	-1.16557	0.253846	-4.59164	4.4e-06	0.000178678	Down		_	_
TRIAE_CS42_7BS_TGACv1_592678_AA1942960	1774	38	0.98	82	1.85	70	1.73	21	0.54	20	0.5	15	0.38	39.8029	-1.11429	0.242694	-4.59134	4.4e-06	0.000178821	Down	gi|992168734|gb|EES06117.2| hypothetical protein SORBI_004G006400 [Sorghum bicolor]	_	molecular_function:heme binding(GO:0020037);molecular_function:oxidoreductase activity, acting on paired donors, with incorporation or reduction of molecular oxygen(GO:0016705);molecular_function:monooxygenase activity(GO:0004497);molecular_function:iron ion binding(GO:0005506);molecular_function:electron carrier activity(GO:0009055);biological_process:oxidation-reduction process(GO:0055114)
TRIAE_CS42_1AL_TGACv1_000890_AA0021200	4320	437	9.01	683	12.35	594	11.81	1898	38.81	1089	21.64	1202	24.59	985.931	1.02699	0.223687	4.59117	4.41e-06	0.000178854	Ups	gi|357128406|ref|XP_003565864.1| PREDICTED: serine/threonine-protein kinase STY8-like [Brachypodium distachyon]<>gi|944069245|gb|KQK04729.1| hypothetical protein BRADI_2g15560 [Brachypodium distachyon]	_	cellular_component:plasma membrane(GO:0005886);biological_process:protein phosphorylation(GO:0006468);molecular_function:ATP binding(GO:0005524);molecular_function:protein serine/threonine kinase activity(GO:0004674)
TRIAE_CS42_1DL_TGACv1_063574_AA0228760	899	13	0.6	16	0.64	19	0.84	48	2.18	65	2.87	40	1.82	33.6293	1.12562	0.24545	4.58593	4.52e-06	0.000183055	Ups	gi|475625370|gb|EMT32950.1| hypothetical protein F775_09863 [Aegilops tauschii]	_	_
TRIAE_CS42_4DL_TGACv1_345036_AA1151170	1785	34	1.34	45	1.56	54	2.05	12	0.47	12	0.46	9	0.35	27.0545	-1.15551	0.251985	-4.58565	4.53e-06	0.000183068	Down	gi|357112832|ref|XP_003558210.1| PREDICTED: photosynthetic NDH subunit of lumenal location 1, chloroplastic [Brachypodium distachyon]<>gi|944086938|gb|KQK22290.1| hypothetical protein BRADI_1g66296 [Brachypodium distachyon]	_	cellular_component:photosystem II oxygen evolving complex(GO:0009654);molecular_function:calcium ion binding(GO:0005509);biological_process:photosynthesis(GO:0015979);cellular_component:extrinsic component of membrane(GO:0019898)
TRIAE_CS42_7DS_TGACv1_623962_AA2057840	2159	26	0.8	40	1.08	33	0.97	112	3.4	86	2.54	55	1.67	58.7361	1.04521	0.228244	4.57933	4.66e-06	0.000187738	Ups	gi|242082051|ref|XP_002445794.1| hypothetical protein SORBIDRAFT_07g025843, partial [Sorghum bicolor]	K09286	_
TRIAE_CS42_1AL_TGACv1_001202_AA0026890	1430	29	0.84	64	1.62	35	0.97	116	3.32	124	3.45	70	2	72.7457	1.02131	0.223163	4.57653	4.73e-06	0.00018944	Ups	gi|326497249|dbj|BAK02209.1| predicted protein [Hordeum vulgare subsp. vulgare]	_	_
TRIAE_CS42_1BL_TGACv1_033120_AA0137150	1670	14	0.35	30	0.65	20	0.48	54	1.32	66	1.57	59	1.45	40.4905	1.08448	0.237143	4.57311	4.81e-06	0.000192197	Ups	gi|326507492|dbj|BAK03139.1| predicted protein [Hordeum vulgare subsp. vulgare]	K09287	biological_process:transcription, DNA-templated(GO:0006351)
TRIAE_CS42_2DL_TGACv1_160076_AA0546450	1323	10	0.31	36	0.98	19	0.57	89	2.75	63	1.89	50	1.55	44.4701	1.12252	0.245494	4.57247	4.82e-06	0.000192548	Ups	gi|475489637|gb|EMT03445.1| hypothetical protein F775_05038 [Aegilops tauschii]	_	_
TRIAE_CS42_3DS_TGACv1_274198_AA0935000	983	150	3.87	189	4.28	73	1.82	438	11.21	422	10.49	357	9.14	272.054	1.10463	0.242104	4.56264	5.05e-06	0.000201013	Ups	gi|474253416|gb|EMS60285.1| Bowman-Birk type trypsin inhibitor [Triticum urartu]	_	biological_process:negative regulation of peptidase activity(GO:0010466);cellular_component:extracellular region(GO:0005576);molecular_function:serine-type endopeptidase inhibitor activity(GO:0004867)
TRIAE_CS42_2AS_TGACv1_114082_AA0363920	1116	71	2.63	109	3.53	127	4.53	27	0.99	56	2	24	0.88	67.4829	-1.04966	0.230248	-4.55883	5.14e-06	0.000203835	Down	gi|474366898|gb|EMS63549.1| hypothetical protein TRIUR3_07493 [Triticum urartu]	_	_
TRIAE_CS42_3AL_TGACv1_196491_AA0660810	1418	19	0.64	44	1.3	27	0.88	63	2.11	78	2.54	88	2.95	53.0861	1.04349	0.228949	4.55776	5.17e-06	0.000204617	Ups	gi|669030644|emb|CDM85240.1| unnamed protein product [Triticum aestivum]	K15777	molecular_function:ferrous iron binding(GO:0008198);biological_process:cellular aromatic compound metabolic process(GO:0006725);biological_process:oxidation-reduction process(GO:0055114);molecular_function:zinc ion binding(GO:0008270);molecular_function:oxidoreductase activity, acting on single donors with incorporation of molecular oxygen(GO:0016701)
TRIAE_CS42_4BL_TGACv1_321592_AA1062650	1486	23	0.32	43	0.53	59	0.8	5	0.07	14	0.19	3	0.04	23.8229	-1.1759	0.258323	-4.55206	5.31e-06	0.000208827	Down	gi|82791907|gb|ABB90886.1| putative DRE binding factor [Triticum aestivum]	K09286	molecular_function:sequence-specific DNA binding transcription factor activity(GO:0003700);molecular_function:DNA binding(GO:0003677);cellular_component:nucleus(GO:0005634);biological_process:regulation of transcription, DNA-templated(GO:0006355)
TRIAE_CS42_6AL_TGACv1_474019_AA1533800	550	33	2.48	42	2.76	22	1.59	55	4.09	86	6.22	113	8.41	58.5897	1.0531	0.231548	4.54811	5.41e-06	0.000211876	Ups		_	_
TRIAE_CS42_5BL_TGACv1_407857_AA1360010	1515	16	0.45	31	0.76	33	0.89	84	2.34	87	2.35	49	1.36	50.0521	1.07252	0.235924	4.54605	5.47e-06	0.000213574	Ups	gi|326498409|dbj|BAJ98632.1| predicted protein, partial [Hordeum vulgare subsp. vulgare]	_	biological_process:metabolic process(GO:0008152);molecular_function:hydrolase activity(GO:0016787)
TRIAE_CS42_2AL_TGACv1_093177_AA0274140	3891	6	0.14	15	0.31	14	0.32	37	0.87	44	1	45	1.05	26.9292	1.14493	0.252302	4.53792	5.68e-06	0.000220359	Ups	gi|475512454|gb|EMT05493.1| Leucine-rich repeat soc-2-like protein [Aegilops tauschii]	_	_
TRIAE_CS42_2DS_TGACv1_178077_AA0590360	2302	15	0.17	23	0.23	23	0.25	54	0.61	134	1.47	34	0.38	47.1923	1.14658	0.252692	4.53744	5.69e-06	0.00022073	Ups	gi|475528301|gb|EMT07605.1| hypothetical protein F775_29486 [Aegilops tauschii]	_	molecular_function:metal ion binding(GO:0046872);molecular_function:nucleoside-triphosphatase activity(GO:0017111);biological_process:protein metabolic process(GO:0019538);molecular_function:ATP binding(GO:0005524);molecular_function:DNA binding(GO:0003677);cellular_component:chloroplast envelope(GO:0009941);cellular_component:apoplast(GO:0048046);molecular_function:translation elongation factor …
TRIAE_CS42_4BL_TGACv1_320359_AA1036670	2046	59	1.22	63	1.15	65	1.3	13	0.27	20	0.4	27	0.56	40.4097	-1.07982	0.238147	-4.53423	5.78e-06	0.000223631	Down	gi|326508006|dbj|BAJ86746.1| predicted protein [Hordeum vulgare subsp. vulgare]	_	cellular_component:chloroplast thylakoid membrane(GO:0009535)
TRIAE_CS42_6BL_TGACv1_500618_AA1607370	1945	17	0.44	68	1.54	82	2.04	476	12.19	303	7.54	513	13.14	246.098	1.15174	0.254219	4.53051	5.88e-06	0.00022677	Ups	gi|475564824|gb|EMT14622.1| Bifunctional dihydroflavonol 4-reductase/flavanone 4-reductase [Aegilops tauschii]	K09753	biological_process:cellular metabolic process(GO:0044237);molecular_function:nucleotide binding(GO:0000166);molecular_function:coenzyme binding(GO:0050662);molecular_function:catalytic activity(GO:0003824)
TRIAE_CS42_5AL_TGACv1_375823_AA1227600	16539	19	0.93	58	2.49	42	1.98	3	0.15	12	0.57	5	0.24	22.2236	-1.17039	0.258369	-4.5299	5.9e-06	0.000227249	Down	gi|326487876|dbj|BAJ89777.1| predicted protein, partial [Hordeum vulgare subsp. vulgare]	_	_
TRIAE_CS42_3DS_TGACv1_271986_AA0912330	3524	29	0.31	98	0.91	67	0.68	14	0.15	24	0.25	8	0.08	38.4319	-1.14927	0.253938	-4.52577	6.02e-06	0.000231034	Down	gi|669027839|emb|CDM81419.1| unnamed protein product [Triticum aestivum]	K06617	biological_process:sucrose biosynthetic process(GO:0005986);biological_process:mannitol biosynthetic process(GO:0019593);biological_process:galactose metabolic process(GO:0006012);biological_process:response to water deprivation(GO:0009414);molecular_function:galactinol-sucrose galactosyltransferase activity(GO:0047274);biological_process:response to abscisic acid(GO:0009737);cellular_component:c…
TRIAE_CS42_2AL_TGACv1_093489_AA0281040	2875	42	1.26	30	0.79	43	1.25	0	0	7	0.2	12	0.36	21.9894	-1.16714	0.25832	-4.51821	6.24e-06	0.000238016	Down	gi|326514732|dbj|BAJ99727.1| predicted protein [Hordeum vulgare subsp. vulgare]	K13051	molecular_function:hydrolase activity(GO:0016787)
TRIAE_CS42_2AL_TGACv1_093764_AA0286300	1083	28	1.07	28	0.94	24	0.88	0	0	2	0.07	7	0.26	14.4622	-1.15303	0.25549	-4.51301	6.39e-06	0.000242484	Down	gi|721693142|ref|XP_010240184.1| PREDICTED: vacuolar iron transporter homolog 2-like [Brachypodium distachyon]<>gi|944048167|gb|KQJ83808.1| hypothetical protein BRADI_5g16990 [Brachypodium distachyon]	_	cellular_component:intracellular membrane-bounded organelle(GO:0043231);cellular_component:cytoplasmic part(GO:0044444);cellular_component:membrane(GO:0016020)
TRIAE_CS42_1AL_TGACv1_001348_AA0029060	1517	10	0.3	24	0.62	22	0.63	46	1.35	116	3.31	39	1.15	42.8076	1.13793	0.252758	4.50205	6.73e-06	0.000252795	Ups	gi|474419310|gb|EMS67413.1| putative WRKY transcription factor 70 [Triticum urartu]	_	_
TRIAE_CS42_6DS_TGACv1_543357_AA1738940	17896	51	1.71	47	1.38	45	1.45	14	0.46	7	0.23	17	0.56	29.6343	-1.12614	0.250327	-4.49869	6.84e-06	0.000256082	Down	gi|326521052|dbj|BAJ96729.1| predicted protein [Hordeum vulgare subsp. vulgare]	K16241	molecular_function:sequence-specific DNA binding transcription factor activity(GO:0003700);molecular_function:sequence-specific DNA binding(GO:0043565);biological_process:regulation of transcription, DNA-templated(GO:0006355)
TRIAE_CS42_4BL_TGACv1_320288_AA1034040	10404	619	2.54	825	2.97	784	3.1	159	0.65	264	1.04	351	1.43	489.813	-1.04311	0.231884	-4.4984	6.85e-06	0.000256278	Down	gi|428697083|gb|AFZ61900.1| MATE1B [Triticum aestivum]<>gi|428697087|gb|AFZ61902.1| MATE1B [Triticum aestivum]<>gi|428697089|gb|AFZ61903.1| MATE1B [Triticum aestivum]<>gi|428697093|gb|AFZ61905.1| MATE1B [Triticum aestivum]<>gi|428697095|gb|AFZ61906.1| MATE1B [Triticum aestivum]	_	_
TRIAE_CS42_5BL_TGACv1_407080_AA1353100	1479	4	0.12	13	0.34	27	0.77	50	1.48	44	1.26	77	2.27	36.1328	1.14705	0.255167	4.49527	6.95e-06	0.00025977	Ups	gi|475568473|gb|EMT15489.1| Thiol protease SEN102 [Aegilops tauschii]	K16292	_
TRIAE_CS42_6AL_TGACv1_472056_AA1517320	1045	6	0.27	4	0.16	6	0.26	47	2.08	22	0.95	22	0.97	18.0664	1.15899	0.258228	4.48826	7.18e-06	0.000267226	Ups	gi|357143020|ref|XP_003572774.1| PREDICTED: uncharacterized protein LOC100835550 [Brachypodium distachyon]<>gi|944065026|gb|KQK00617.1| hypothetical protein BRADI_3g50700 [Brachypodium distachyon]	_	_
TRIAE_CS42_7AL_TGACv1_556205_AA1758240	1115	21	0.78	22	0.71	41	1.46	84	3.08	50	1.78	105	3.86	54.2849	1.07402	0.239559	4.48333	7.35e-06	0.000272218	Ups	gi|474108397|gb|EMS55521.1| hypothetical protein TRIUR3_12088 [Triticum urartu]	_	_
TRIAE_CS42_2AL_TGACv1_097679_AA0324900	2242	45	0.83	33	0.53	36	0.64	10	0.18	9	0.16	7	0.13	22.9731	-1.14586	0.255636	-4.48239	7.38e-06	0.000273257	Down	gi|326527137|dbj|BAK04510.1| predicted protein [Hordeum vulgare subsp. vulgare]	_	_
TRIAE_CS42_2BS_TGACv1_149173_AA0496500	2631	14	0.26	19	0.31	9	0.16	70	1.27	79	1.4	20	0.36	35.2613	1.14719	0.256163	4.47833	7.52e-06	0.000277063	Ups	gi|475615121|gb|EMT29325.1| hypothetical protein F775_05834 [Aegilops tauschii]	_	_
TRIAE_CS42_5AL_TGACv1_375188_AA1217460	1662	37	0.92	33	0.72	25	0.6	3	0.07	6	0.14	8	0.2	18.2594	-1.15596	0.258329	-4.47475	7.65e-06	0.000280616	Down	gi|475489790|gb|EMT03457.1| Anthocyanidin 3-O-glucosyltransferase [Aegilops tauschii]	_	molecular_function:transferase activity, transferring glycosyl groups(GO:0016757)
TRIAE_CS42_U_TGACv1_641145_AA2086630	26804	219	5.2	530	11.03	249	5.69	1007	23.69	826	18.89	973	22.91	633.641	1.07873	0.241105	4.47411	7.67e-06	0.000281309	Ups	gi|23954367|emb|CAD27730.1| xylanase inhibitor [Triticum aestivum]<>gi|56201268|dbj|BAD72880.1| xylanase inhibitor TAXI-I [Triticum aestivum]<>gi|669030503|emb|CDM85049.1| unnamed protein product [Triticum aestivum]	_	biological_process:xylan catabolic process(GO:0045493);biological_process:proteolysis(GO:0006508);molecular_function:aspartic-type endopeptidase activity(GO:0004190)
TRIAE_CS42_7DS_TGACv1_622006_AA2031000	14785	85	0.29	223	0.66	112	0.36	387	1.29	486	1.57	363	1.21	275.506	1.09225	0.244206	4.47267	7.72e-06	0.000282877	Ups	gi|473782085|gb|EMS46123.1| Wall-associated receptor kinase 3 [Triticum urartu]	K04733	molecular_function:polysaccharide binding(GO:0030247);molecular_function:calcium ion binding(GO:0005509);biological_process:protein phosphorylation(GO:0006468);molecular_function:ATP binding(GO:0005524);molecular_function:protein serine/threonine kinase activity(GO:0004674)
TRIAE_CS42_5DL_TGACv1_433082_AA1401240	1872	5	0.12	5	0.1	4	0.09	24	0.56	18	0.41	42	0.98	16.5388	1.15107	0.257869	4.46377	8.05e-06	0.000291568	Ups	gi|475598999|gb|EMT24111.1| hypothetical protein F775_52527 [Aegilops tauschii]	K13027	molecular_function:heme binding(GO:0020037);molecular_function:oxidoreductase activity, acting on paired donors, with incorporation or reduction of molecular oxygen(GO:0016705);molecular_function:monooxygenase activity(GO:0004497);molecular_function:iron ion binding(GO:0005506);molecular_function:electron carrier activity(GO:0009055);biological_process:oxidation-reduction process(GO:0055114)
TRIAE_CS42_4BL_TGACv1_321123_AA1055760	2216	46	0.72	69	0.95	36	0.54	16	0.25	7	0.11	16	0.25	30.7385	-1.12268	0.251549	-4.46305	8.08e-06	0.000291718	Down	gi|326529981|dbj|BAK08270.1| predicted protein [Hordeum vulgare subsp. vulgare]	_	molecular_function:heme binding(GO:0020037);molecular_function:oxidoreductase activity, acting on paired donors, with incorporation or reduction of molecular oxygen(GO:0016705);molecular_function:monooxygenase activity(GO:0004497);molecular_function:iron ion binding(GO:0005506);molecular_function:electron carrier activity(GO:0009055);biological_process:oxidation-reduction process(GO:0055114)
TRIAE_CS42_6DL_TGACv1_526572_AA1687310	2261	32	0.6	30	0.49	49	0.89	9	0.17	7	0.13	8	0.15	22.1305	-1.14425	0.25683	-4.45527	8.38e-06	0.000301266	Down	gi|765529848|gb|AJS11516.1| 9-cis epoxycarotenoid dioxygenase [Triticum aestivum]	K09840	_
TRIAE_CS42_7DS_TGACv1_621796_AA2026250	4145	65	1.41	48	0.91	61	1.27	19	0.41	22	0.46	14	0.3	37.6698	-1.07473	0.241453	-4.45109	8.54e-06	0.000305484	Down	gi|475579660|gb|EMT18395.1| Putative sulfate transporter 3.4 [Aegilops tauschii]	K17471	cellular_component:integral component of membrane(GO:0016021);molecular_function:secondary active sulfate transmembrane transporter activity(GO:0008271);biological_process:sulfate transport(GO:0008272);biological_process:transmembrane transport(GO:0055085)
TRIAE_CS42_U_TGACv1_641224_AA2088860	797	7	0.36	22	1	15	0.75	46	2.36	42	2.1	56	2.88	31.3909	1.11134	0.249716	4.45041	8.57e-06	0.000305995	Ups	gi|326506258|dbj|BAJ86447.1| predicted protein [Hordeum vulgare subsp. vulgare]	_	_
TRIAE_CS42_3B_TGACv1_220907_AA0723380	610	7	0.47	6	0.36	6	0.39	40	2.68	22	1.43	30	2.01	18.7079	1.14893	0.258226	4.44931	8.61e-06	0.000307182	Ups		_	_
TRIAE_CS42_5AL_TGACv1_374802_AA1209180	1116	9	0.33	16	0.52	12	0.43	39	1.43	48	1.71	38	1.39	27.071	1.11556	0.250749	4.4489	8.63e-06	0.000307342	Ups	gi|326503808|dbj|BAK02690.1| predicted protein [Hordeum vulgare subsp. vulgare]	_	_
TRIAE_CS42_4DS_TGACv1_362234_AA1178040	4128	20	0.2	10	0.09	16	0.16	57	0.58	50	0.49	41	0.42	32.6347	1.10184	0.247668	4.44887	8.63e-06	0.000307342	Ups	gi|242085348|ref|XP_002443099.1| hypothetical protein SORBIDRAFT_08g008420 [Sorghum bicolor]<>gi|241943792|gb|EES16937.1| hypothetical protein SORBI_008G084900 [Sorghum bicolor]	_	biological_process:phosphorylation(GO:0016310);molecular_function:protein kinase activity(GO:0004672);molecular_function:nucleotide binding(GO:0000166)
TRIAE_CS42_3AL_TGACv1_197593_AA0666810	1793	6	0.14	8	0.16	9	0.2	32	0.73	30	0.67	35	0.8	20.1576	1.14059	0.256963	4.43874	9.05e-06	0.000319861	Ups	gi|326504674|dbj|BAK06628.1| predicted protein [Hordeum vulgare subsp. vulgare]	_	biological_process:primary metabolic process(GO:0044238);biological_process:macromolecule metabolic process(GO:0043170)
TRIAE_CS42_3B_TGACv1_224332_AA0795340	2239	52	1.43	137	3.3	134	3.55	44	1.2	27	0.72	40	1.09	70.3712	-1.03466	0.233164	-4.43748	9.1e-06	0.000321384	Down	gi|669027938|emb|CDM81566.1| unnamed protein product [Triticum aestivum]	_	cellular_component:membrane(GO:0016020);molecular_function:metalloendopeptidase activity(GO:0004222);biological_process:proteolysis(GO:0006508)
TRIAE_CS42_6BL_TGACv1_499451_AA1582890	865	62	2.96	49	2.05	61	2.8	24	1.14	3	0.14	15	0.71	35.16	-1.12771	0.25445	-4.43195	9.34e-06	0.000328839	Down	gi|326522200|dbj|BAK04228.1| predicted protein, partial [Hordeum vulgare subsp. vulgare]	K14488	_
TRIAE_CS42_U_TGACv1_642816_AA2123650	2219	68	1.04	86	1.15	154	2.27	43	0.65	23	0.34	40	0.61	67.9772	-1.03785	0.234692	-4.42218	9.77e-06	0.000341812	Down	gi|357164674|ref|XP_003580130.1| PREDICTED: protein CUP-SHAPED COTYLEDON 1-like [Brachypodium distachyon]<>gi|944047932|gb|KQJ83573.1| hypothetical protein BRADI_5g15587 [Brachypodium distachyon]	_	molecular_function:DNA binding(GO:0003677);biological_process:regulation of transcription, DNA-templated(GO:0006355)
TRIAE_CS42_3DS_TGACv1_273329_AA0930400	1763	32	0.75	79	1.62	55	1.24	15	0.35	8	0.18	20	0.46	33.6718	-1.11317	0.251838	-4.42017	9.86e-06	0.000344449	Down	gi|669028487|emb|CDM82303.1| unnamed protein product [Triticum aestivum]<>gi|669028492|emb|CDM82310.1| unnamed protein product [Triticum aestivum]	K17479	_
TRIAE_CS42_1BL_TGACv1_030825_AA0101560	2957	47	1.04	82	1.58	103	2.19	27	0.59	23	0.49	29	0.63	50.729	-1.03907	0.235098	-4.41975	9.88e-06	0.000344939	Down	gi|474241763|gb|EMS59833.1| hypothetical protein TRIUR3_17784 [Triticum urartu]	_	_
TRIAE_CS42_7AL_TGACv1_556346_AA1761370	1698	42	1.09	21	0.48	33	0.83	78	2.01	57	1.43	133	3.44	61.3214	1.05025	0.239388	4.38725	1.15e-05	0.000393012	Ups	gi|1002280301|ref|XP_015644453.1| PREDICTED: uncharacterized protein LOC4341843 [Oryza sativa Japonica Group]<>gi|52076632|dbj|BAD45533.1| hypothetical protein [Oryza sativa Japonica Group]<>gi|52076918|dbj|BAD45930.1| hypothetical protein [Oryza sativa Japonica Group]<>gi|113596401|dbj|BAF20275.1| Os06g0678100 [Oryza sativa Japonica Group]<>gi|125556475|gb|EAZ02081.1| hypothetical protein OsI_24…	_	_
TRIAE_CS42_6DL_TGACv1_526364_AA1680860	1449	32	0.91	44	1.1	22	0.6	10	0.28	4	0.11	3	0.08	18.5547	-1.13311	0.258351	-4.38595	1.15e-05	0.000395159	Down	gi|326522164|dbj|BAK04210.1| predicted protein [Hordeum vulgare subsp. vulgare]	_	_
TRIAE_CS42_7DS_TGACv1_623599_AA2054690	2745	24	0.81	25	0.74	23	0.75	74	2.49	43	1.4	75	2.52	44.2571	1.03584	0.236452	4.38076	1.18e-05	0.000403285	Ups		_	_
TRIAE_CS42_3DL_TGACv1_249438_AA0848740	1885	3	0.11	18	0.56	14	0.48	185	6.51	100	3.42	69	2.43	65.5661	1.08588	0.248315	4.37299	1.23e-05	0.000415166	Ups	gi|475579582|gb|EMT18373.1| hypothetical protein F775_12761 [Aegilops tauschii]	_	_
TRIAE_CS42_6BS_TGACv1_513411_AA1640730	635	50	3.25	81	4.62	131	8.2	229	14.76	316	19.79	332	21.41	190.886	1.09876	0.25175	4.36448	1.27e-05	0.000427366	Ups	gi|475607178|gb|EMT26620.1| hypothetical protein F775_30870 [Aegilops tauschii]	_	_
TRIAE_CS42_6AL_TGACv1_470976_AA1499970	1043	6	0.29	8	0.34	7	0.33	30	1.43	19	0.88	51	2.44	20.3829	1.12737	0.258326	4.36413	1.28e-05	0.000427622	Ups	gi|475564824|gb|EMT14622.1| Bifunctional dihydroflavonol 4-reductase/flavanone 4-reductase [Aegilops tauschii]	K09753	biological_process:cellular metabolic process(GO:0044237);molecular_function:nucleotide binding(GO:0000166);molecular_function:coenzyme binding(GO:0050662);molecular_function:catalytic activity(GO:0003824)
TRIAE_CS42_6AL_TGACv1_471856_AA1515240	2794	69	1.02	61	0.79	72	1.02	11	0.16	30	0.43	26	0.38	44.1357	-1.04261	0.239597	-4.35153	1.35e-05	0.000449437	Down	gi|357143059|ref|XP_003572788.1| PREDICTED: protein QUIRKY-like [Brachypodium distachyon]<>gi|944065074|gb|KQK00665.1| hypothetical protein BRADI_3g50990 [Brachypodium distachyon]	_	molecular_function:transferase activity(GO:0016740)
TRIAE_CS42_3B_TGACv1_221570_AA0744570	2325	5	0.06	19	0.21	14	0.17	41	0.52	49	0.61	40	0.51	28.0174	1.09874	0.252853	4.34538	1.39e-05	0.000458882	Ups	gi|669030601|emb|CDM85180.1| unnamed protein product [Triticum aestivum]	K14638	cellular_component:membrane(GO:0016020);biological_process:response to nematode(GO:0009624);biological_process:transport(GO:0006810);cellular_component:plasma membrane(GO:0005886);molecular_function:transporter activity(GO:0005215)
TRIAE_CS42_1BL_TGACv1_032156_AA0126140	4125	18	0.27	32	0.42	40	0.57	88	1.3	61	0.87	75	1.11	52.4897	1.00245	0.23087	4.34204	1.41e-05	0.000464886	Ups	gi|326502630|dbj|BAJ98943.1| predicted protein [Hordeum vulgare subsp. vulgare]	_	biological_process:recognition of pollen(GO:0048544);biological_process:protein phosphorylation(GO:0006468);molecular_function:ATP binding(GO:0005524);molecular_function:protein serine/threonine kinase activity(GO:0004674)
TRIAE_CS42_7AL_TGACv1_558911_AA1796870	1711	63	1.52	65	1.37	45	1.05	8	0.19	22	0.51	22	0.53	36.6992	-1.06763	0.246451	-4.33201	1.48e-05	0.000483185	Down		_	_
TRIAE_CS42_4DL_TGACv1_355281_AA1157330	1043	11	0.54	44	1.9	22	1.04	79	3.85	81	3.83	55	2.68	48.4833	1.05066	0.24272	4.32868	1.5e-05	0.000488333	Ups	gi|5869973|emb|CAB55558.1| germin-like protein [Triticum aestivum]	_	cellular_component:apoplast(GO:0048046);molecular_function:manganese ion binding(GO:0030145);molecular_function:nutrient reservoir activity(GO:0045735)
TRIAE_CS42_3B_TGACv1_225611_AA0810350	13613	8	0.15	10	0.16	7	0.13	37	0.69	25	0.45	38	0.71	20.9966	1.11064	0.256852	4.32406	1.53e-05	0.000497887	Ups	gi|669027496|emb|CDM80898.1| unnamed protein product [Triticum aestivum]	_	molecular_function:protein kinase activity(GO:0004672);molecular_function:nucleotide binding(GO:0000166)
TRIAE_CS42_3DL_TGACv1_249521_AA0850630	3048	41	0.6	43	0.56	35	0.5	12	0.18	9	0.13	10	0.15	24.4694	-1.09426	0.253124	-4.32301	1.54e-05	0.000499763	Down		_	_
TRIAE_CS42_7DL_TGACv1_602903_AA1971580	6496	14	0.25	31	0.49	21	0.37	91	1.63	47	0.82	51	0.92	42.5806	1.05491	0.244092	4.32178	1.55e-05	0.000501554	Ups	gi|326490656|dbj|BAJ89995.1| predicted protein [Hordeum vulgare subsp. vulgare]	_	molecular_function:peptidase activity(GO:0008233)
TRIAE_CS42_4AL_TGACv1_289828_AA0977330	9330	76	0.85	98	0.96	126	1.35	25	0.28	17	0.18	58	0.64	65.4901	-1.03126	0.239655	-4.3031	1.68e-05	0.00053791	Down	gi|475587682|gb|EMT20628.1| Endonuclease III-like protein 1 [Aegilops tauschii]	K10773	biological_process:protein metabolic process(GO:0019538);molecular_function:ATP binding(GO:0005524);molecular_function:nucleoside-triphosphatase activity(GO:0017111)
TRIAE_CS42_3DS_TGACv1_272901_AA0926370	1036	62	2.47	44	1.54	29	1.11	6	0.24	12	0.46	15	0.59	27.5377	-1.09904	0.255555	-4.30062	1.7e-05	0.000543147	Down	gi|445136|prf||1908436B heat shock protein 16.9 [Triticum aestivum]	K13993	_
TRIAE_CS42_2AS_TGACv1_112504_AA0339490	1846	10	0.42	26	0.96	5	0.2	40	1.67	51	2.07	52	2.17	30.6352	1.09346	0.254367	4.29875	1.72e-05	0.000546935	Ups	gi|475583616|gb|EMT19517.1| hypothetical protein F775_19882 [Aegilops tauschii]	K00799	_
TRIAE_CS42_5BL_TGACv1_405192_AA1321810	3576	5	0.08	4	0.06	6	0.09	14	0.22	61	0.94	21	0.33	18.6032	1.10135	0.256444	4.29471	1.75e-05	0.000555511	Ups	gi|475574369|gb|EMT16972.1| Putative transporter [Aegilops tauschii]	K07088	biological_process:transmembrane transport(GO:0055085);cellular_component:integral component of membrane(GO:0016021)
TRIAE_CS42_3B_TGACv1_225541_AA0809560	1935	41	1.13	48	1.16	39	1.03	16	0.44	10	0.26	9	0.25	26.5568	-1.07895	0.251654	-4.28744	1.81e-05	0.000571269	Down	gi|669028264|emb|CDM82009.1| unnamed protein product [Triticum aestivum]	_	biological_process:lipid metabolic process(GO:0006629);molecular_function:hydrolase activity, acting on ester bonds(GO:0016788)
TRIAE_CS42_4BL_TGACv1_320407_AA1038150	2409	22	1.18	26	1.23	23	1.19	55	2.93	74	3.84	51	2.72	41.8955	1.00113	0.23362	4.28529	1.82e-05	0.000575413	Ups	gi|326491817|dbj|BAJ98133.1| predicted protein [Hordeum vulgare subsp. vulgare]<>gi|326524502|dbj|BAK00634.1| predicted protein [Hordeum vulgare subsp. vulgare]	_	biological_process:oxidation-reduction process(GO:0055114);molecular_function:oxidoreductase activity, acting on paired donors, with incorporation or reduction of molecular oxygen, 2-oxoglutarate as one donor, and incorporation of one atom each of oxygen into both donors(GO:0016706)
TRIAE_CS42_6BS_TGACv1_514208_AA1656990	1049	31	1.22	30	1.04	53	2.01	11	0.43	2	0.08	10	0.39	22.4719	-1.1056	0.258231	-4.28144	1.86e-05	0.000583463	Down	gi|473952981|gb|EMS50797.1| Chlorophyll a-b binding protein, chloroplastic [Triticum urartu]	K08912	cellular_component:membrane(GO:0016020);molecular_function:metal ion binding(GO:0046872);biological_process:photosynthesis, light harvesting(GO:0009765);cellular_component:chloroplast(GO:0009507)
TRIAE_CS42_5BL_TGACv1_412328_AA1367790	739	19	1.06	50	2.45	12	0.65	1	0.06	2	0.11	5	0.28	14.0448	-1.07603	0.251684	-4.2753	1.91e-05	0.000595687	Down	gi|670020646|emb|CDJ26488.1| unnamed protein product [Triticum aestivum]	_	_
TRIAE_CS42_7DL_TGACv1_603770_AA1988920	1902	27	0.74	52	1.25	61	1.61	14	0.38	15	0.4	7	0.19	28.565	-1.08273	0.254296	-4.25778	2.06e-05	0.000633867	Down	gi|106880178|emb|CAJ87104.1| red chlorophyll catabolite reductase [Festuca pratensis]	K13545	biological_process:chlorophyll catabolic process(GO:0015996);molecular_function:oxidoreductase activity(GO:0016491);cellular_component:chloroplast stroma(GO:0009570);biological_process:oxidation-reduction process(GO:0055114)
TRIAE_CS42_2BL_TGACv1_129987_AA0401070	1828	11	0.34	21	0.56	18	0.53	38	1.15	57	1.68	51	1.55	32.7059	1.04716	0.245962	4.25743	2.07e-05	0.000634539	Ups	gi|474390746|gb|EMS65282.1| hypothetical protein TRIUR3_22156 [Triticum urartu]	_	_
TRIAE_CS42_3AS_TGACv1_212399_AA0700600	5353	15	0.27	42	0.66	7	0.12	73	1.3	64	1.11	61	1.08	43.5438	1.06609	0.250482	4.25615	2.08e-05	0.000637577	Ups	gi|326505262|dbj|BAK03018.1| predicted protein [Hordeum vulgare subsp. vulgare]	_	molecular_function:polysaccharide binding(GO:0030247);biological_process:protein phosphorylation(GO:0006468);molecular_function:ATP binding(GO:0005524);molecular_function:protein serine/threonine kinase activity(GO:0004674)
TRIAE_CS42_2DS_TGACv1_177615_AA0581110	1099	11	0.45	4	0.14	8	0.32	38	1.55	19	0.75	48	1.96	21.658	1.09415	0.258316	4.23569	2.28e-05	0.000687333	Ups	gi|474438841|gb|EMS68321.1| hypothetical protein TRIUR3_34649 [Triticum urartu]	_	_
TRIAE_CS42_U_TGACv1_641230_AA2089060	2979	21	0.44	42	0.77	12	0.24	89	1.85	71	1.43	49	1.02	47.2446	1.03139	0.244398	4.22013	2.44e-05	0.000729675	Ups	gi|475582317|gb|EMT19096.1| Wall-associated receptor kinase 4 [Aegilops tauschii]	K04733	_
TRIAE_CS42_6BL_TGACv1_499349_AA1578840	1373	25	0.75	20	0.53	16	0.46	68	2.03	43	1.25	55	1.64	38.0796	1.01626	0.2414	4.20987	2.56e-05	0.000758346	Ups	gi|357143020|ref|XP_003572774.1| PREDICTED: uncharacterized protein LOC100835550 [Brachypodium distachyon]<>gi|944065026|gb|KQK00617.1| hypothetical protein BRADI_3g50700 [Brachypodium distachyon]	_	_
TRIAE_CS42_1DL_TGACv1_061831_AA0204060	2424	20	0.58	32	0.81	37	1.03	4	0.11	5	0.14	8	0.23	17.2039	-1.07845	0.258353	-4.17434	2.99e-05	0.000867296	Down	gi|475530770|gb|EMT07953.1| hypothetical protein F775_21580 [Aegilops tauschii]	_	_
TRIAE_CS42_5BL_TGACv1_405234_AA1322970	1809	11	0.3	35	0.83	12	0.31	89	2.39	65	1.69	33	0.89	40.7592	1.05417	0.253307	4.16165	3.16e-05	0.000906693	Ups	gi|51702424|gb|AAU08785.1| NAC domain transcription factor [Triticum aestivum]	_	molecular_function:DNA binding(GO:0003677);biological_process:regulation of transcription, DNA-templated(GO:0006355)
TRIAE_CS42_6BL_TGACv1_500408_AA1604160	27439	8	0.14	17	0.26	10	0.17	36	0.63	27	0.46	60	1.05	26.4605	1.06126	0.255673	4.15086	3.31e-05	0.000945442	Ups	gi|473901909|gb|EMS49230.1| putative cyclic nucleotide-gated ion channel 17 [Triticum urartu]	K05391	_
TRIAE_CS42_4DS_TGACv1_361018_AA1158870	3289	16	0.42	13	0.3	16	0.41	47	1.23	62	1.58	30	0.78	30.8161	1.03752	0.250274	4.14556	3.39e-05	0.000964585	Ups	gi|475607485|gb|EMT26728.1| Putative C-4 methylsterol oxidase [Aegilops tauschii]	K14423	biological_process:fatty acid biosynthetic process(GO:0006633);molecular_function:oxidoreductase activity(GO:0016491);molecular_function:iron ion binding(GO:0005506);cellular_component:integral component of membrane(GO:0016021);biological_process:oxidation-reduction process(GO:0055114)
TRIAE_CS42_U_TGACv1_640995_AA2081780	1117	52	2.11	54	1.92	51	1.99	12	0.48	17	0.66	23	0.92	34.1967	-1.00727	0.24338	-4.13867	3.49e-05	0.000988724	Down	gi|326523259|dbj|BAJ88670.1| predicted protein [Hordeum vulgare subsp. vulgare]	_	cellular_component:membrane(GO:0016020);cellular_component:plastid(GO:0009536)
TRIAE_CS42_4DL_TGACv1_342488_AA1115020	12913	712	3.21	1599	6.33	1257	5.47	265	1.19	511	2.22	304	1.36	750.8	-1.0284	0.249338	-4.12452	3.72e-05	0.00104005	Down	gi|24371012|emb|CAD54674.1| sulphate transporter [Triticum urartu]	K17470	cellular_component:integral component of membrane(GO:0016021);molecular_function:secondary active sulfate transmembrane transporter activity(GO:0008271);biological_process:sulfate transport(GO:0008272);biological_process:transmembrane transport(GO:0055085)
TRIAE_CS42_7AS_TGACv1_569274_AA1812240	1663	29	0.9	38	1.04	37	1.11	9	0.28	7	0.21	10	0.31	21.1627	-1.0552	0.256155	-4.11936	3.8e-05	0.00105901	Down	gi|475602269|gb|EMT25082.1| Phosphoethanolamine/phosphocholine phosphatase [Aegilops tauschii]	K13248	_
TRIAE_CS42_2AL_TGACv1_092917_AA0266980	959	11	0.47	30	1.13	42	1.74	95	4.05	51	2.11	82	3.5	52.0506	1.00746	0.244677	4.11749	3.83e-05	0.00106624	Ups	gi|326520553|dbj|BAK07535.1| predicted protein [Hordeum vulgare subsp. vulgare]	_	_
TRIAE_CS42_7BL_TGACv1_580059_AA1911790	2451	1	0.02	10	0.15	5	0.08	30	0.5	46	0.75	14	0.23	17.6797	1.05327	0.256446	4.10716	4.01e-05	0.0011067	Ups	gi|326523373|dbj|BAJ88727.1| predicted protein [Hordeum vulgare subsp. vulgare]	_	molecular_function:carbohydrate binding(GO:0030246);biological_process:protein phosphorylation(GO:0006468);molecular_function:ATP binding(GO:0005524);molecular_function:protein serine/threonine kinase activity(GO:0004674)
TRIAE_CS42_4AL_TGACv1_292322_AA0998430	837	18	1	13	0.63	9	0.48	39	2.15	29	1.55	67	3.7	29.4464	1.04532	0.254558	4.1064	4.02e-05	0.00110958	Ups	gi|474391712|gb|EMS65382.1| hypothetical protein TRIUR3_05744 [Triticum urartu]	_	_
TRIAE_CS42_1AL_TGACv1_000229_AA0006730	1879	29	0.68	50	1.03	31	0.7	4	0.09	1	0.02	15	0.35	20.9563	-1.05898	0.258024	-4.10419	4.06e-05	0.00111546	Down	gi|327179111|gb|AEA30106.1| gibberellin 2-oxidase [Triticum aestivum]	K04125	biological_process:oxidation-reduction process(GO:0055114);molecular_function:iron ion binding(GO:0005506);molecular_function:oxidoreductase activity, acting on paired donors, with incorporation or reduction of molecular oxygen, 2-oxoglutarate as one donor, and incorporation of one atom each of oxygen into both donors(GO:0016706)
TRIAE_CS42_7AL_TGACv1_557584_AA1783580	3195	40	0.35	60	0.46	50	0.42	14	0.12	15	0.13	20	0.17	32.3727	-1.00306	0.24467	-4.09964	4.14e-05	0.00113356	Down	gi|402783752|dbj|BAM37955.1| putative short internodesfamily transcription factor [Hordeum vulgare subsp. vulgare]	_	_
TRIAE_CS42_1AL_TGACv1_000172_AA0005290	1069	9	0.38	58	2.17	32	1.31	5	0.21	7	0.29	1	0.04	17.682	-1.03945	0.253929	-4.09346	4.25e-05	0.00115894	Down	gi|326527991|dbj|BAJ89047.1| predicted protein [Hordeum vulgare subsp. vulgare]	_	_
TRIAE_CS42_3B_TGACv1_226018_AA0813420	10847	19	0.19	14	0.12	14	0.13	52	0.51	49	0.46	35	0.34	30.6832	1.01147	0.247714	4.0832	4.44e-05	0.00120264	Ups	gi|669027494|emb|CDM80892.1| unnamed protein product [Triticum aestivum]	K04730	molecular_function:polysaccharide binding(GO:0030247);cellular_component:cytoplasmic membrane-bounded vesicle(GO:0016023);biological_process:protein phosphorylation(GO:0006468);molecular_function:ATP binding(GO:0005524);molecular_function:protein serine/threonine kinase activity(GO:0004674)
TRIAE_CS42_1AS_TGACv1_019182_AA0062450	8436	38	0.46	55	0.59	74	0.87	208	2.51	290	3.39	111	1.34	129.819	1.04916	0.256968	4.08284	4.45e-05	0.00120348	Ups	gi|475548339|gb|EMT11058.1| Disease resistance protein RPM1 [Aegilops tauschii]	_	_
TRIAE_CS42_3B_TGACv1_223354_AA0780810	1117	8	0.33	7	0.25	7	0.28	31	1.27	27	1.08	29	1.19	18.3213	1.05229	0.257798	4.08185	4.47e-05	0.00120569	Ups	gi|633020283|gb|AHZ44773.1| heat shock factor C1b [Triticum aestivum]	K09419	molecular_function:sequence-specific DNA binding transcription factor activity(GO:0003700);molecular_function:sequence-specific DNA binding(GO:0043565);cellular_component:nucleus(GO:0005634);biological_process:regulation of transcription, DNA-templated(GO:0006355)
TRIAE_CS42_2AL_TGACv1_093902_AA0288990	1294	3	0.06	11	0.2	5	0.1	34	0.71	35	0.71	18	0.38	17.7001	1.0508	0.258249	4.06893	4.72e-05	0.00126277	Ups	gi|475611105|gb|EMT27975.1| hypothetical protein F775_17442 [Aegilops tauschii]	_	_
TRIAE_CS42_1DL_TGACv1_062121_AA0209040	7879	10	0.2	19	0.34	8	0.16	45	0.9	33	0.64	40	0.8	25.8874	1.03107	0.253421	4.0686	4.73e-05	0.00126399	Ups	gi|475592756|gb|EMT22180.1| Prion protein-interacting protein [Aegilops tauschii]	_	_
TRIAE_CS42_1AS_TGACv1_019579_AA0068730	3896	35	1.14	51	1.45	46	1.44	7	0.23	3	0.09	21	0.68	26.4881	-1.04591	0.25763	-4.05973	4.91e-05	0.00130541	Down	gi|326495424|dbj|BAJ85808.1| predicted protein [Hordeum vulgare subsp. vulgare]	_	_
TRIAE_CS42_6BS_TGACv1_513562_AA1644880	1451	2	0.06	11	0.27	21	0.58	63	1.78	22	0.6	59	1.66	29.9685	1.04729	0.258365	4.05352	5.05e-05	0.00133501	Ups	gi|1002239762|ref|XP_015624122.1| PREDICTED: F-box/kelch-repeat protein At1g80440 [Oryza sativa Japonica Group]<>gi|49387897|dbj|BAD25000.1| kelch repeat-containing F-box-like [Oryza sativa Japonica Group]<>gi|49387909|dbj|BAD25009.1| kelch repeat-containing F-box-like [Oryza sativa Japonica Group]	_	_
TRIAE_CS42_4BL_TGACv1_320881_AA1050830	735	37	2.08	24	1.18	43	2.33	11	0.61	8	0.43	6	0.33	21.2603	-1.03927	0.257611	-4.03425	5.48e-05	0.00142476	Down		_	_
TRIAE_CS42_3AS_TGACv1_212016_AA0696780	1518	14	0.38	18	0.43	10	0.26	42	1.13	61	1.6	28	0.76	28.8632	1.01839	0.252695	4.03011	5.57e-05	0.00144564	Ups	gi|326492574|dbj|BAK02070.1| predicted protein [Hordeum vulgare subsp. vulgare]	_	biological_process:metabolic process(GO:0008152);molecular_function:hydrolase activity(GO:0016787)
TRIAE_CS42_4AS_TGACv1_308399_AA1027760	2445	23	0.43	36	0.6	35	0.64	10	0.19	7	0.13	4	0.07	18.6544	-1.03753	0.258177	-4.01867	5.85e-05	0.00150403	Down	gi|326529981|dbj|BAK08270.1| predicted protein [Hordeum vulgare subsp. vulgare]	_	molecular_function:heme binding(GO:0020037);molecular_function:oxidoreductase activity, acting on paired donors, with incorporation or reduction of molecular oxygen(GO:0016705);molecular_function:monooxygenase activity(GO:0004497);molecular_function:iron ion binding(GO:0005506);molecular_function:electron carrier activity(GO:0009055);biological_process:oxidation-reduction process(GO:0055114)
TRIAE_CS42_7BL_TGACv1_577311_AA1871880	12090	5	0.05	5	0.04	3	0.03	18	0.17	35	0.33	18	0.17	14.0851	1.03049	0.256675	4.01478	5.95e-05	0.00152359	Ups	gi|473744594|gb|EMS45471.1| Cysteine-rich receptor-like protein kinase 7 [Triticum urartu]	_	_
TRIAE_CS42_4BL_TGACv1_321958_AA1067170	1215	38	1.29	67	2	29	0.95	12	0.4	15	0.49	11	0.37	27.7125	-1.01616	0.253277	-4.01203	6.02e-05	0.00153595	Down	gi|633020287|gb|AHZ44775.1| heat shock factor C2f [Triticum aestivum]	K09419	molecular_function:sequence-specific DNA binding transcription factor activity(GO:0003700);molecular_function:sequence-specific DNA binding(GO:0043565);cellular_component:nucleus(GO:0005634);biological_process:regulation of transcription, DNA-templated(GO:0006355)
TRIAE_CS42_6DS_TGACv1_542451_AA1720600	8269	5	0.04	13	0.1	10	0.08	37	0.31	23	0.19	41	0.35	21.6084	1.02388	0.257331	3.97886	6.92e-05	0.0017219	Ups	gi|475604802|gb|EMT25844.1| Putative LRR receptor-like serine/threonine-protein kinase [Aegilops tauschii]	_	molecular_function:protein kinase activity(GO:0004672)
TRIAE_CS42_1DL_TGACv1_063825_AA0231120	1045	28	1.11	65	2.25	48	1.83	11	0.43	18	0.68	13	0.51	29.5315	-1.00032	0.251806	-3.97259	7.11e-05	0.00175734	Down	gi|473942331|gb|EMS50391.1| hypothetical protein TRIUR3_26659 [Triticum urartu]	_	_
TRIAE_CS42_6BL_TGACv1_499756_AA1591050	1754	5	0.12	17	0.35	7	0.16	30	0.7	82	1.86	17	0.4	26.2586	1.02394	0.258101	3.96721	7.27e-05	0.00178858	Ups	gi|363418364|gb|AEW23186.1| MYB73 [Triticum aestivum]	K09422	molecular_function:DNA binding(GO:0003677);molecular_function:chromatin binding(GO:0003682)
TRIAE_CS42_2DL_TGACv1_158899_AA0528160	4196	7	0.07	3	0.03	6	0.06	29	0.3	20	0.2	26	0.27	15.3663	1.01967	0.258004	3.95217	7.74e-05	0.00188462	Ups	gi|475610613|gb|EMT27797.1| E3 ubiquitin-protein ligase RNF14 [Aegilops tauschii]	K11971	molecular_function:zinc ion binding(GO:0008270);molecular_function:nucleic acid binding(GO:0003676)
TRIAE_CS42_3DL_TGACv1_249177_AA0840530	4059	0	0	8	0.25	5	0.17	41	1.42	22	0.74	15	0.52	15.2531	1.00229	0.254036	3.94547	7.96e-05	0.00192576	Ups	gi|113734244|dbj|BAF30424.1| basic helix-loop-helix protein [Hordeum vulgare subsp. vulgare]	_	molecular_function:protein dimerization activity(GO:0046983);molecular_function:DNA binding(GO:0003677)
TRIAE_CS42_4BL_TGACv1_320705_AA1046720	2998	15	0.39	45	1.03	35	0.88	7	0.18	7	0.18	6	0.16	18.461	-1.01843	0.258358	-3.94193	8.08e-05	0.00194624	Down	gi|326526049|dbj|BAJ93201.1| predicted protein [Hordeum vulgare subsp. vulgare]	K01620	molecular_function:pyridoxal phosphate binding(GO:0030170);biological_process:cellular amino acid metabolic process(GO:0006520);molecular_function:lyase activity(GO:0016829)
TRIAE_CS42_3DL_TGACv1_252786_AA0891970	1369	47	1.52	39	1.11	30	0.93	6	0.19	12	0.37	14	0.45	24.228	-1.00622	0.25544	-3.93915	8.18e-05	0.00196527	Down		_	_
TRIAE_CS42_6DS_TGACv1_542451_AA1720680	848	6	0.29	38	1.62	9	0.42	62	2.99	46	2.16	61	2.95	36.8625	1.00614	0.255681	3.93514	8.31e-05	0.00199088	Ups	gi|475582316|gb|EMT19095.1| hypothetical protein F775_01101 [Aegilops tauschii]	_	_
TRIAE_CS42_7BL_TGACv1_578335_AA1893140	2455	36	0.87	35	0.74	40	0.93	8	0.19	16	0.37	6	0.14	23.0553	-1.00737	0.256062	-3.93408	8.35e-05	0.00199711	Down	gi|815729568|gb|AKE47414.1| hypothetical protein TAANSRALLhA_1716E15.g00005 [Triticum aestivum]	_	_
TRIAE_CS42_5AL_TGACv1_374988_AA1213310	16087	7	0.05	14	0.08	14	0.09	53	0.34	31	0.19	30	0.19	24.9477	1.00447	0.255372	3.93335	8.38e-05	0.00200135	Ups	gi|514758913|ref|XP_004964156.1| PREDICTED: uncharacterized protein LOC101784970 [Setaria italica]	_	_
TRIAE_CS42_4BL_TGACv1_320441_AA1039210	4225	11	0.17	10	0.14	5	0.08	33	0.51	36	0.54	25	0.39	20.1085	1.01182	0.257428	3.93048	8.48e-05	0.00202318	Ups	gi|475546430|gb|EMT10681.1| Lectin-domain containing receptor kinase A4.2 [Aegilops tauschii]	K04730	biological_process:protein phosphorylation(GO:0006468);biological_process:chitin catabolic process(GO:0006032);molecular_function:protein serine/threonine kinase activity(GO:0004674);biological_process:cell wall macromolecule catabolic process(GO:0016998);molecular_function:ATP binding(GO:0005524);molecular_function:chitinase activity(GO:0004568)
TRIAE_CS42_5BL_TGACv1_406541_AA1346790	759	9	0.49	14	0.67	12	0.63	21	1.13	63	3.3	36	1.94	25.8632	1.00389	0.256729	3.91031	9.22e-05	0.00216911	Ups	gi|475535968|gb|EMT08832.1| Zinc finger protein 1 [Aegilops tauschii]	_	_
TRIAE_CS42_6DS_TGACv1_543932_AA1745420	3096	22	0.5	47	0.94	38	0.84	13	0.29	7	0.15	7	0.16	21.6458	-1.00309	0.257353	-3.89773	9.71e-05	0.0022643	Down	gi|475514145|gb|EMT05693.1| hypothetical protein F775_20546 [Aegilops tauschii]	_	molecular_function:transferase activity, transferring glycosyl groups(GO:0016757)
