# Supplementary material for: Transcriptomic and Systematic Analyses Reveal TabZIP Family Members Involved in the Response to Different Concentrations of Auxin in Wheat Root
Source: Research Square preprint supplement (doi:10.21203/rs.3.rs-114349/v1), 2020-12-01
Supplement: Supplementary file 2 [file c93d16a5410dbc1f59db989e.xlsx]

## Sheet: Table S3
Table S3：Pathways and proportions after KEGG analysis of DEGs in control vs 1uM auxin.
Pathway ID	Pathway	Kategory	DEGs with pathway annotation (135)	All genes with pathway annotation (21388)	Pvalue	Qvalue	Genelist	KOlist	Pathwaylink
ko00280	Valine, leucine and isoleucine degradation	Metabolism	6(4.44%)	134(0.63%)	2.30239e-05	0.000798163	TRIAE_CS42_1DS_TGACv1_080324_AA0245930,TRIAE_CS42_4AL_TGACv1_288251_AA0942400,TRIAE_CS42_6AS_TGACv1_485866_AA1553530,TRIAE_CS42_1BS_TGACv1_049760_AA0160980,TRIAE_CS42_1AS_TGACv1_019383_AA0065910,TRIAE_CS42_6AL_TGACv1_472264_AA1520170,	K00253,K01969,K00167,K00128,	http://www.kegg.jp/kegg-bin/show_pathway?scale=1.0&query=&map=ko00280&use=reference&multi_query=K00253+red%0D%0AK01969+red%0D%0AK00167+red%0D%0AK00128+red%0D%0A
ko05418	Fluid shear stress and atherosclerosis		8(5.93%)	555(2.59%)	0.00873019	0.0353348	TRIAE_CS42_4BL_TGACv1_320555_AA1043120,TRIAE_CS42_4AS_TGACv1_308636_AA1028740,TRIAE_CS42_6AL_TGACv1_473438_AA1531100,TRIAE_CS42_4DL_TGACv1_342497_AA1115230,TRIAE_CS42_2DS_TGACv1_177249_AA0570400,TRIAE_CS42_4BL_TGACv1_321295_AA1058570,TRIAE_CS42_1BL_TGACv1_030930_AA0103950,TRIAE_CS42_2AS_TGACv1_112504_AA0339490,	K00799,K07198,	http://www.kegg.jp/kegg-bin/show_pathway?scale=1.0&query=&map=ko05418&use=reference&multi_query=K00799+green%0D%0AK07198+blue%0D%0A
ko05204	Chemical carcinogenesis	Human Diseases	6(4.44%)	295(1.38%)	0.00272918	0.0180758	TRIAE_CS42_4BL_TGACv1_320555_AA1043120,TRIAE_CS42_4AS_TGACv1_308636_AA1028740,TRIAE_CS42_6AL_TGACv1_473438_AA1531100,TRIAE_CS42_2DS_TGACv1_177249_AA0570400,TRIAE_CS42_1BL_TGACv1_030930_AA0103950,TRIAE_CS42_2AS_TGACv1_112504_AA0339490,	K00799,	http://www.kegg.jp/kegg-bin/show_pathway?scale=1.0&query=&map=ko05204&use=reference&multi_query=K00799+green%0D%0A
ko04975	Fat digestion and absorption	Organismal Systems	1(0.74%)	23(0.11%)	0.00917347	0.0353348	TRIAE_CS42_7AL_TGACv1_556845_AA1771970,	K01047,	http://www.kegg.jp/kegg-bin/show_pathway?scale=1.0&query=&map=ko04975&use=reference&multi_query=K01047+blue%0D%0A
ko04712	Circadian rhythm - plant	Organismal Systems	5(3.70%)	158(0.74%)	0.000506893	0.00527168	TRIAE_CS42_7DL_TGACv1_603253_AA1979190,TRIAE_CS42_6BS_TGACv1_513423_AA1641170,TRIAE_CS42_6DL_TGACv1_526347_AA1680110,TRIAE_CS42_6AL_TGACv1_474694_AA1535750,TRIAE_CS42_6DS_TGACv1_543357_AA1738940,	K16241,K16223,	http://www.kegg.jp/kegg-bin/show_pathway?scale=1.0&query=&map=ko04712&use=reference&multi_query=K16241+blue%0D%0AK16223+blue%0D%0A
ko00350	Tyrosine metabolism	Metabolism	4(2.96%)	191(0.89%)	0.00734013	0.0331901	TRIAE_CS42_4BS_TGACv1_329166_AA1098520,TRIAE_CS42_1BL_TGACv1_032544_AA0131180,TRIAE_CS42_1AL_TGACv1_000411_AA0011470,TRIAE_CS42_4AL_TGACv1_288905_AA0961060,	K18857,	http://www.kegg.jp/kegg-bin/show_pathway?scale=1.0&query=&map=ko00350&use=reference&multi_query=K18857+red%0D%0A
ko00073	Cutin, suberine and wax biosynthesis	Metabolism	14(10.37%)	149(0.70%)	3.2451e-14	3.3749e-12	TRIAE_CS42_1DL_TGACv1_064773_AA0235660,TRIAE_CS42_3B_TGACv1_220873_AA0722030,TRIAE_CS42_1BL_TGACv1_030671_AA0097460,TRIAE_CS42_2AS_TGACv1_113493_AA0356930,TRIAE_CS42_3DS_TGACv1_272861_AA0925850,TRIAE_CS42_2BS_TGACv1_145943_AA0450210,TRIAE_CS42_2DS_TGACv1_178461_AA0595900,TRIAE_CS42_2DS_TGACv1_178705_AA0600000,TRIAE_CS42_1AL_TGACv1_003667_AA0051000,TRIAE_CS42_2AS_TGACv1_112654_AA0342930,TRIAE_CS42…	K15402,K13356,K15400,K17991,K15398,	http://www.kegg.jp/kegg-bin/show_pathway?scale=1.0&query=&map=ko00073&use=reference&multi_query=K15402+blue%0D%0AK13356+blue%0D%0AK15400+blue%0D%0AK17991+blue%0D%0AK15398+blue%0D%0A
ko00480	Glutathione metabolism	Metabolism	7(5.19%)	438(2.05%)	0.00671854	0.0317604	TRIAE_CS42_4BL_TGACv1_320555_AA1043120,TRIAE_CS42_4AS_TGACv1_308636_AA1028740,TRIAE_CS42_6AL_TGACv1_473438_AA1531100,TRIAE_CS42_2DS_TGACv1_177249_AA0570400,TRIAE_CS42_7DL_TGACv1_602877_AA1970850,TRIAE_CS42_1BL_TGACv1_030930_AA0103950,TRIAE_CS42_2AS_TGACv1_112504_AA0339490,	K00799,K01920,	http://www.kegg.jp/kegg-bin/show_pathway?scale=1.0&query=&map=ko00480&use=reference&multi_query=K00799+green%0D%0AK01920+red%0D%0A
ko00680	Methane metabolism	Metabolism	6(4.44%)	198(0.93%)	0.000267233	0.00347403	TRIAE_CS42_4DS_TGACv1_361511_AA1169370,TRIAE_CS42_5DS_TGACv1_456793_AA1478070,TRIAE_CS42_5AS_TGACv1_392499_AA1259600,TRIAE_CS42_5BS_TGACv1_423387_AA1375670,TRIAE_CS42_4AS_TGACv1_306678_AA1011970,TRIAE_CS42_1DL_TGACv1_061063_AA0183610,	K00122,K01623,K03841,	http://www.kegg.jp/kegg-bin/show_pathway?scale=1.0&query=&map=ko00680&use=reference&multi_query=K00122+red%0D%0AK01623+blue%0D%0AK03841+green%0D%0A
ko00940	Phenylpropanoid biosynthesis	Metabolism	18(13.33%)	1111(5.19%)	7.16096e-05	0.00148948	TRIAE_CS42_6DL_TGACv1_527316_AA1702110,TRIAE_CS42_2DS_TGACv1_179032_AA0603750,TRIAE_CS42_6BL_TGACv1_503059_AA1627150,TRIAE_CS42_3AL_TGACv1_193996_AA0624190,TRIAE_CS42_5DL_TGACv1_433740_AA1420990,TRIAE_CS42_5AL_TGACv1_374195_AA1193240,TRIAE_CS42_3DL_TGACv1_249627_AA0852940,TRIAE_CS42_2AS_TGACv1_113088_AA0351050,TRIAE_CS42_6BL_TGACv1_500618_AA1607360,TRIAE_CS42_2DS_TGACv1_178659_AA0599140,TRIAE_CS4…	K09753,K00430,K01188,K09755,	http://www.kegg.jp/kegg-bin/show_pathway?scale=1.0&query=&map=ko00940&use=reference&multi_query=K09753+red%0D%0AK00430+green%0D%0AK01188+blue%0D%0AK09755+red%0D%0A
ko00920	Sulfur metabolism	Metabolism	3(2.22%)	114(0.53%)	0.00593156	0.0293754	TRIAE_CS42_2AS_TGACv1_112241_AA0333980,TRIAE_CS42_2DS_TGACv1_177565_AA0580190,TRIAE_CS42_2BS_TGACv1_145868_AA0447700,	K05907,	http://www.kegg.jp/kegg-bin/show_pathway?scale=1.0&query=&map=ko00920&use=reference&multi_query=K05907+blue%0D%0A
ko01524	Platinum drug resistance		7(5.19%)	418(1.95%)	0.00511375	0.0265964	TRIAE_CS42_2DL_TGACv1_157956_AA0503340,TRIAE_CS42_4BL_TGACv1_320555_AA1043120,TRIAE_CS42_4AS_TGACv1_308636_AA1028740,TRIAE_CS42_6AL_TGACv1_473438_AA1531100,TRIAE_CS42_2DS_TGACv1_177249_AA0570400,TRIAE_CS42_1BL_TGACv1_030930_AA0103950,TRIAE_CS42_2AS_TGACv1_112504_AA0339490,	K17686,K00799,	http://www.kegg.jp/kegg-bin/show_pathway?scale=1.0&query=&map=ko01524&use=reference&multi_query=K17686+blue%0D%0AK00799+green%0D%0A
ko00010	Glycolysis / Gluconeogenesis	Metabolism	11(8.15%)	457(2.14%)	3.38166e-05	0.000879233	TRIAE_CS42_4DL_TGACv1_346216_AA1155370,TRIAE_CS42_5DS_TGACv1_456793_AA1478070,TRIAE_CS42_5AS_TGACv1_392499_AA1259600,TRIAE_CS42_4BS_TGACv1_329166_AA1098520,TRIAE_CS42_1BL_TGACv1_032544_AA0131180,TRIAE_CS42_1AL_TGACv1_000411_AA0011470,TRIAE_CS42_5BS_TGACv1_423387_AA1375670,TRIAE_CS42_4AS_TGACv1_306678_AA1011970,TRIAE_CS42_4AL_TGACv1_288905_AA0961060,TRIAE_CS42_1DL_TGACv1_061063_AA0183610,TRIAE_CS4…	K01568,K01623,K18857,K03841,K00128,	http://www.kegg.jp/kegg-bin/show_pathway?scale=1.0&query=&map=ko00010&use=reference&multi_query=K01568+red%0D%0AK01623+blue%0D%0AK18857+red%0D%0AK03841+green%0D%0AK00128+red%0D%0A
ko00071	Fatty acid degradation	Metabolism	5(3.70%)	155(0.72%)	0.000457955	0.00527168	TRIAE_CS42_4BS_TGACv1_329166_AA1098520,TRIAE_CS42_1BL_TGACv1_032544_AA0131180,TRIAE_CS42_1AL_TGACv1_000411_AA0011470,TRIAE_CS42_4AL_TGACv1_288905_AA0961060,TRIAE_CS42_6AL_TGACv1_472264_AA1520170,	K18857,K00128,	http://www.kegg.jp/kegg-bin/show_pathway?scale=1.0&query=&map=ko00071&use=reference&multi_query=K18857+red%0D%0AK00128+red%0D%0A
ko00980	Metabolism of xenobiotics by cytochrome P450	Metabolism	6(4.44%)	292(1.37%)	0.00257851	0.0180758	TRIAE_CS42_4BL_TGACv1_320555_AA1043120,TRIAE_CS42_4AS_TGACv1_308636_AA1028740,TRIAE_CS42_6AL_TGACv1_473438_AA1531100,TRIAE_CS42_2DS_TGACv1_177249_AA0570400,TRIAE_CS42_1BL_TGACv1_030930_AA0103950,TRIAE_CS42_2AS_TGACv1_112504_AA0339490,	K00799,	http://www.kegg.jp/kegg-bin/show_pathway?scale=1.0&query=&map=ko00980&use=reference&multi_query=K00799+green%0D%0A
ko00592	alpha-Linolenic acid metabolism	Metabolism	8(5.93%)	213(1.00%)	8.6034e-06	0.000447377	TRIAE_CS42_4AS_TGACv1_306835_AA1013950,TRIAE_CS42_4BS_TGACv1_329166_AA1098520,TRIAE_CS42_1BL_TGACv1_032544_AA0131180,TRIAE_CS42_1AL_TGACv1_000411_AA0011470,TRIAE_CS42_1DL_TGACv1_062452_AA0214710,TRIAE_CS42_7DS_TGACv1_625379_AA2064980,TRIAE_CS42_4AL_TGACv1_288905_AA0961060,TRIAE_CS42_7AL_TGACv1_556845_AA1771970,	K10529,K18857,K05894,K00454,K01047,	http://www.kegg.jp/kegg-bin/show_pathway?scale=1.0&query=&map=ko00592&use=reference&multi_query=K10529+red%0D%0AK18857+red%0D%0AK05894+blue%0D%0AK00454+red%0D%0AK01047+blue%0D%0A
ko00052	Galactose metabolism	Metabolism	6(4.44%)	296(1.38%)	0.00278089	0.0180758	TRIAE_CS42_6AS_TGACv1_486383_AA1560850,TRIAE_CS42_2DS_TGACv1_178537_AA0597250,TRIAE_CS42_6AS_TGACv1_487896_AA1573490,TRIAE_CS42_2BS_TGACv1_147022_AA0476710,TRIAE_CS42_5DL_TGACv1_433530_AA1415640,TRIAE_CS42_3DS_TGACv1_271986_AA0912330,	K01193,K18819,K01784,K06617,	http://www.kegg.jp/kegg-bin/show_pathway?scale=1.0&query=&map=ko00052&use=reference&multi_query=K01193+blue%0D%0AK18819+blue%0D%0AK01784+red%0D%0AK06617+blue%0D%0A
ko00196	Photosynthesis - antenna proteins	Metabolism	4(2.96%)	88(0.41%)	0.000239468	0.00347403	TRIAE_CS42_6BS_TGACv1_514827_AA1664770,TRIAE_CS42_7BS_TGACv1_592029_AA1928680,TRIAE_CS42_1BL_TGACv1_033547_AA0140310,TRIAE_CS42_6BS_TGACv1_514208_AA1656990,	K08912,	http://www.kegg.jp/kegg-bin/show_pathway?scale=1.0&query=&map=ko00196&use=reference&multi_query=K08912+blue%0D%0A
ko00982	Drug metabolism - cytochrome P450	Metabolism	6(4.44%)	331(1.55%)	0.0051147	0.0265964	TRIAE_CS42_4BL_TGACv1_320555_AA1043120,TRIAE_CS42_4AS_TGACv1_308636_AA1028740,TRIAE_CS42_6AL_TGACv1_473438_AA1531100,TRIAE_CS42_2DS_TGACv1_177249_AA0570400,TRIAE_CS42_1BL_TGACv1_030930_AA0103950,TRIAE_CS42_2AS_TGACv1_112504_AA0339490,	K00799,	http://www.kegg.jp/kegg-bin/show_pathway?scale=1.0&query=&map=ko00982&use=reference&multi_query=K00799+green%0D%0A
ko00965	Betalain biosynthesis	Metabolism	1(0.74%)	15(0.07%)	0.00393478	0.0240716	TRIAE_CS42_3AL_TGACv1_196491_AA0660810,	K15777,	http://www.kegg.jp/kegg-bin/show_pathway?scale=1.0&query=&map=ko00965&use=reference&multi_query=K15777+red%0D%0A
ko00051	Fructose and mannose metabolism	Metabolism	5(3.70%)	249(1.16%)	0.00505706	0.0265964	TRIAE_CS42_5DS_TGACv1_456793_AA1478070,TRIAE_CS42_5AS_TGACv1_392499_AA1259600,TRIAE_CS42_5BS_TGACv1_423387_AA1375670,TRIAE_CS42_4AS_TGACv1_306678_AA1011970,TRIAE_CS42_1DL_TGACv1_061063_AA0183610,	K01623,K03841,	http://www.kegg.jp/kegg-bin/show_pathway?scale=1.0&query=&map=ko00051&use=reference&multi_query=K01623+blue%0D%0AK03841+green%0D%0A
ko00040	Pentose and glucuronate interconversions	Metabolism	6(4.44%)	230(1.08%)	0.000655646	0.00619884	TRIAE_CS42_1BL_TGACv1_030541_AA0093530,TRIAE_CS42_1AL_TGACv1_000246_AA0007210,TRIAE_CS42_1DL_TGACv1_063761_AA0230650,TRIAE_CS42_1DL_TGACv1_063886_AA0231430,TRIAE_CS42_1BL_TGACv1_030496_AA0092320,TRIAE_CS42_2DL_TGACv1_158803_AA0526410,	K01213,K01051,	http://www.kegg.jp/kegg-bin/show_pathway?scale=1.0&query=&map=ko00040&use=reference&multi_query=K01213+blue%0D%0AK01051+blue%0D%0A
ko00981	Insect hormone biosynthesis	Metabolism	1(0.74%)	23(0.11%)	0.00917347	0.0353348	TRIAE_CS42_6AL_TGACv1_472264_AA1520170,	K00128,	http://www.kegg.jp/kegg-bin/show_pathway?scale=1.0&query=&map=ko00981&use=reference&multi_query=K00128+red%0D%0A
ko00030	Pentose phosphate pathway	Metabolism	5(3.70%)	187(0.87%)	0.0012193	0.0097544	TRIAE_CS42_5DS_TGACv1_456793_AA1478070,TRIAE_CS42_5AS_TGACv1_392499_AA1259600,TRIAE_CS42_5BS_TGACv1_423387_AA1375670,TRIAE_CS42_4AS_TGACv1_306678_AA1011970,TRIAE_CS42_1DL_TGACv1_061063_AA0183610,	K01623,K03841,	http://www.kegg.jp/kegg-bin/show_pathway?scale=1.0&query=&map=ko00030&use=reference&multi_query=K01623+blue%0D%0AK03841+green%0D%0A
ko00710	Carbon fixation in photosynthetic organisms	Metabolism	6(4.44%)	244(1.14%)	0.000927001	0.00803401	TRIAE_CS42_5DS_TGACv1_456793_AA1478070,TRIAE_CS42_5AS_TGACv1_392499_AA1259600,TRIAE_CS42_5BS_TGACv1_423387_AA1375670,TRIAE_CS42_2AS_TGACv1_112635_AA0342640,TRIAE_CS42_4AS_TGACv1_306678_AA1011970,TRIAE_CS42_1DL_TGACv1_061063_AA0183610,	K01623,K01602,K03841,	http://www.kegg.jp/kegg-bin/show_pathway?scale=1.0&query=&map=ko00710&use=reference&multi_query=K01623+blue%0D%0AK01602+blue%0D%0AK03841+green%0D%0A
ko00591	Linoleic acid metabolism	Metabolism	2(1.48%)	66(0.31%)	0.00842316	0.0353348	TRIAE_CS42_7DS_TGACv1_625379_AA2064980,TRIAE_CS42_7AL_TGACv1_556845_AA1771970,	K00454,K01047,	http://www.kegg.jp/kegg-bin/show_pathway?scale=1.0&query=&map=ko00591&use=reference&multi_query=K00454+red%0D%0AK01047+blue%0D%0A
ko00750	Vitamin B6 metabolism	Metabolism	3(2.22%)	40(0.19%)	0.000116311	0.00201606	TRIAE_CS42_7AL_TGACv1_557124_AA1776980,TRIAE_CS42_2BL_TGACv1_132648_AA0438860,TRIAE_CS42_7AS_TGACv1_569274_AA1812240,	K13248,K06215,	http://www.kegg.jp/kegg-bin/show_pathway?scale=1.0&query=&map=ko00750&use=reference&multi_query=K13248+blue%0D%0AK06215+blue%0D%0A

## Sheet: Table S4
Table S4：Pathways and proportions after KEGG analysis of DEGs in control vs 50uM auxin.
Pathway ID	Pathway	Kategory	DEGs with pathway annotation (1598)	All genes with pathway annotation (21388)	Pvalue	Qvalue	Genelist	KOlist	Pathwaylink
ko00195	Photosynthesis	Metabolism	50(3.13%)	193(0.90%)	7.59628e-16	2.76315e-14	TRIAE_CS42_3AL_TGACv1_193663_AA0617020,TRIAE_CS42_7AL_TGACv1_560215_AA1801900,TRIAE_CS42_7BL_TGACv1_577306_AA1871720,TRIAE_CS42_2AS_TGACv1_113886_AA0361890,TRIAE_CS42_2DS_TGACv1_178744_AA0600460,TRIAE_CS42_4AS_TGACv1_306561_AA1010200,TRIAE_CS42_7DL_TGACv1_606170_AA2009380,TRIAE_CS42_5DL_TGACv1_433351_AA1410520,TRIAE_CS42_6AL_TGACv1_471733_AA1513570,TRIAE_CS42_2DS_TGACv1_178873_AA0601950,TRIAE_CS4…	K03542,K02639,K02636,K08901,K02109,K02694,K03541,K02641,K02695,K08903,K02699,K08905,K08902,K02115,K02721,K02638,K02723,K02717,K02113,K02703,K02689,	http://www.kegg.jp/kegg-bin/show_pathway?scale=1.0&query=&map=ko00195&use=reference&multi_query=K03542+blue%0D%0AK02639+blue%0D%0AK02636+blue%0D%0AK08901+blue%0D%0AK02109+blue%0D%0AK02694+blue%0D%0AK03541+green%0D%0AK02641+blue%0D%0AK02695+blue%0D%0AK08903+blue%0D%0AK02699+blue%0D%0AK08905+blue%0D%0AK08902+blue%0D%0AK02115+blue%0D%0AK02721+blue%0D%0AK02638+blue%0D%0AK02723+blue%0D%0AK02717+blue%0…
ko05140	Leishmaniasis	Human Diseases	98(6.13%)	857(4.01%)	8.92436e-06	0.000103879	TRIAE_CS42_4AL_TGACv1_289116_AA0965070,TRIAE_CS42_5BL_TGACv1_405411_AA1326720,TRIAE_CS42_7BS_TGACv1_591807_AA1921880,TRIAE_CS42_5BL_TGACv1_406777_AA1349730,TRIAE_CS42_5AL_TGACv1_375257_AA1218660,TRIAE_CS42_1BS_TGACv1_050264_AA0169830,TRIAE_CS42_7DS_TGACv1_622008_AA2031040,TRIAE_CS42_U_TGACv1_640842_AA2076810,TRIAE_CS42_3DS_TGACv1_274412_AA0935710,TRIAE_CS42_7DS_TGACv1_622292_AA2037160,TRIAE_CS42_…	K04733,K04730,	http://www.kegg.jp/kegg-bin/show_pathway?scale=1.0&query=&map=ko05140&use=reference&multi_query=K04733+green%0D%0AK04730+green%0D%0A
ko00592	alpha-Linolenic acid metabolism	Metabolism	33(2.07%)	213(1.00%)	2.09872e-05	0.000226195	TRIAE_CS42_4BS_TGACv1_329166_AA1098520,TRIAE_CS42_4BS_TGACv1_331090_AA1109480,TRIAE_CS42_6BL_TGACv1_502794_AA1626450,TRIAE_CS42_1AS_TGACv1_019551_AA0068100,TRIAE_CS42_7DL_TGACv1_604599_AA1999820,TRIAE_CS42_6DL_TGACv1_527350_AA1702600,TRIAE_CS42_3B_TGACv1_229292_AA0828450,TRIAE_CS42_1DS_TGACv1_080446_AA0248110,TRIAE_CS42_1DS_TGACv1_082303_AA0264390,TRIAE_CS42_3DL_TGACv1_250956_AA0875460,TRIAE_CS42…	K18857,K05894,K08241,K10529,K01047,K01723,K00454,	http://www.kegg.jp/kegg-bin/show_pathway?scale=1.0&query=&map=ko00592&use=reference&multi_query=K18857+red%0D%0AK05894+green%0D%0AK08241+blue%0D%0AK10529+blue%0D%0AK01047+blue%0D%0AK01723+blue%0D%0AK00454+red%0D%0A
ko04626	Plant-pathogen interaction	Organismal Systems	114(7.13%)	944(4.41%)	1.12769e-07	2.73465e-06	TRIAE_CS42_7BS_TGACv1_592288_AA1935050,TRIAE_CS42_1AS_TGACv1_019079_AA0060000,TRIAE_CS42_6BS_TGACv1_514800_AA1664490,TRIAE_CS42_2AS_TGACv1_113707_AA0359660,TRIAE_CS42_6AL_TGACv1_472227_AA1519470,TRIAE_CS42_1BS_TGACv1_049380_AA0151350,TRIAE_CS42_5DS_TGACv1_457623_AA1488360,TRIAE_CS42_5DL_TGACv1_434773_AA1441400,TRIAE_CS42_6DL_TGACv1_527968_AA1710340,TRIAE_CS42_2BS_TGACv1_147292_AA0481270,TRIAE_CS4…	K13449,K13436,K13457,K13448,K13412,K13447,K13420,K13459,K13424,K02183,K13425,K18835,	http://www.kegg.jp/kegg-bin/show_pathway?scale=1.0&query=&map=ko04626&use=reference&multi_query=K13449+green%0D%0AK13436+green%0D%0AK13457+green%0D%0AK13448+green%0D%0AK13412+green%0D%0AK13447+blue%0D%0AK13420+blue%0D%0AK13459+blue%0D%0AK13424+green%0D%0AK02183+blue%0D%0AK13425+blue%0D%0AK18835+blue%0D%0A
ko05164	Influenza A	Human Diseases	74(4.63%)	759(3.55%)	0.00784737	0.0393721	TRIAE_CS42_4AL_TGACv1_289116_AA0965070,TRIAE_CS42_7BS_TGACv1_591807_AA1921880,TRIAE_CS42_5BL_TGACv1_406777_AA1349730,TRIAE_CS42_1BS_TGACv1_050264_AA0169830,TRIAE_CS42_2BL_TGACv1_129404_AA0382260,TRIAE_CS42_7DS_TGACv1_622008_AA2031040,TRIAE_CS42_U_TGACv1_640842_AA2076810,TRIAE_CS42_3DS_TGACv1_274412_AA0935710,TRIAE_CS42_7DS_TGACv1_622292_AA2037160,TRIAE_CS42_7AS_TGACv1_569170_AA1809040,TRIAE_CS42_…	K04733,K00787,K03283,	http://www.kegg.jp/kegg-bin/show_pathway?scale=1.0&query=&map=ko05164&use=reference&multi_query=K04733+green%0D%0AK00787+blue%0D%0AK03283+blue%0D%0A
ko00960	Tropane, piperidine and pyridine alkaloid biosynthesis	Metabolism	14(0.88%)	90(0.42%)	0.00262982	0.0153055	TRIAE_CS42_2BS_TGACv1_148205_AA0491290,TRIAE_CS42_1AL_TGACv1_000995_AA0023350,TRIAE_CS42_5DL_TGACv1_435070_AA1445630,TRIAE_CS42_4AL_TGACv1_289349_AA0969550,TRIAE_CS42_6AL_TGACv1_471819_AA1514670,TRIAE_CS42_1BL_TGACv1_031704_AA0119280,TRIAE_CS42_5BS_TGACv1_423624_AA1380810,TRIAE_CS42_2DS_TGACv1_177654_AA0581940,TRIAE_CS42_1DL_TGACv1_061642_AA0200700,TRIAE_CS42_5DS_TGACv1_457083_AA1482070,TRIAE_CS4…	K00276,K00815,K08081,K14455,	http://www.kegg.jp/kegg-bin/show_pathway?scale=1.0&query=&map=ko00960&use=reference&multi_query=K00276+red%0D%0AK00815+blue%0D%0AK08081+green%0D%0AK14455+blue%0D%0A
ko05145	Toxoplasmosis	Human Diseases	103(6.45%)	1018(4.76%)	0.000656148	0.00477348	TRIAE_CS42_4AL_TGACv1_289116_AA0965070,TRIAE_CS42_5BL_TGACv1_405411_AA1326720,TRIAE_CS42_7BS_TGACv1_591807_AA1921880,TRIAE_CS42_5BL_TGACv1_406777_AA1349730,TRIAE_CS42_5AL_TGACv1_375257_AA1218660,TRIAE_CS42_1BS_TGACv1_050264_AA0169830,TRIAE_CS42_6DL_TGACv1_527968_AA1710340,TRIAE_CS42_7DS_TGACv1_622008_AA2031040,TRIAE_CS42_U_TGACv1_640842_AA2076810,TRIAE_CS42_2DL_TGACv1_158699_AA0524560,TRIAE_CS42_…	K04733,K04730,K13412,K03283,	http://www.kegg.jp/kegg-bin/show_pathway?scale=1.0&query=&map=ko05145&use=reference&multi_query=K04733+green%0D%0AK04730+green%0D%0AK13412+green%0D%0AK03283+blue%0D%0A
ko00052	Galactose metabolism	Metabolism	36(2.25%)	296(1.38%)	0.00144059	0.00931582	TRIAE_CS42_4AL_TGACv1_288169_AA0939290,TRIAE_CS42_7AS_TGACv1_569799_AA1824210,TRIAE_CS42_1BS_TGACv1_050018_AA0166030,TRIAE_CS42_5BL_TGACv1_404785_AA1310760,TRIAE_CS42_7AS_TGACv1_569629_AA1820630,TRIAE_CS42_7AS_TGACv1_569613_AA1820410,TRIAE_CS42_3AS_TGACv1_211725_AA0693400,TRIAE_CS42_2BL_TGACv1_130022_AA0401820,TRIAE_CS42_6BS_TGACv1_513852_AA1650710,TRIAE_CS42_3DS_TGACv1_271986_AA0912330,TRIAE_CS4…	K01193,K01187,K00011,K06617,K18819,K01785,K07407,K01784,K12309,	http://www.kegg.jp/kegg-bin/show_pathway?scale=1.0&query=&map=ko00052&use=reference&multi_query=K01193+green%0D%0AK01187+blue%0D%0AK00011+blue%0D%0AK06617+green%0D%0AK18819+blue%0D%0AK01785+red%0D%0AK07407+blue%0D%0AK01784+red%0D%0AK12309+blue%0D%0A
ko04924	Renin secretion		15(0.94%)	110(0.51%)	0.00761685	0.038886	TRIAE_CS42_3B_TGACv1_223464_AA0782660,TRIAE_CS42_5BL_TGACv1_404944_AA1315820,TRIAE_CS42_5DL_TGACv1_433613_AA1417700,TRIAE_CS42_2BS_TGACv1_146510_AA0467180,TRIAE_CS42_2DS_TGACv1_179422_AA0607050,TRIAE_CS42_3AS_TGACv1_210898_AA0681100,TRIAE_CS42_2DS_TGACv1_179759_AA0609020,TRIAE_CS42_1DL_TGACv1_063523_AA0228220,TRIAE_CS42_2AS_TGACv1_113342_AA0354730,TRIAE_CS42_5AL_TGACv1_375077_AA1215680,TRIAE_CS42…	K06268,K02183,	http://www.kegg.jp/kegg-bin/show_pathway?scale=1.0&query=&map=ko04924&use=reference&multi_query=K06268+blue%0D%0AK02183+blue%0D%0A
ko00944	Flavone and flavonol biosynthesis	Metabolism	12(0.75%)	38(0.18%)	1.98213e-06	3.20444e-05	TRIAE_CS42_6BS_TGACv1_514343_AA1658610,TRIAE_CS42_7AS_TGACv1_569588_AA1819830,TRIAE_CS42_6BS_TGACv1_514261_AA1657580,TRIAE_CS42_6DS_TGACv1_543204_AA1737020,TRIAE_CS42_6BS_TGACv1_514476_AA1660340,TRIAE_CS42_6AS_TGACv1_485180_AA1539230,TRIAE_CS42_4AL_TGACv1_288928_AA0961670,TRIAE_CS42_6DS_TGACv1_542768_AA1729910,TRIAE_CS42_6BS_TGACv1_514476_AA1660330,TRIAE_CS42_2BL_TGACv1_130665_AA0415560,TRIAE_CS4…	K13083,K05279,	http://www.kegg.jp/kegg-bin/show_pathway?scale=1.0&query=&map=ko00944&use=reference&multi_query=K13083+blue%0D%0AK05279+blue%0D%0A
ko00260	Glycine, serine and threonine metabolism	Metabolism	27(1.69%)	229(1.07%)	0.00688856	0.0357959	TRIAE_CS42_4DL_TGACv1_342968_AA1126350,TRIAE_CS42_4BL_TGACv1_320628_AA1045050,TRIAE_CS42_6BL_TGACv1_501351_AA1616370,TRIAE_CS42_2BS_TGACv1_148205_AA0491290,TRIAE_CS42_6DL_TGACv1_526666_AA1689390,TRIAE_CS42_4BS_TGACv1_329104_AA1097850,TRIAE_CS42_4AS_TGACv1_307912_AA1024400,TRIAE_CS42_4DL_TGACv1_343731_AA1138800,TRIAE_CS42_6DS_TGACv1_543041_AA1734480,TRIAE_CS42_2BL_TGACv1_132027_AA0434630,TRIAE_CS4…	K00827,K01834,K00276,K00600,K01620,K15893,K00058,K00306,K00928,K02437,K00382,K15919,K01695,	http://www.kegg.jp/kegg-bin/show_pathway?scale=1.0&query=&map=ko00260&use=reference&multi_query=K00827+blue%0D%0AK01834+blue%0D%0AK00276+red%0D%0AK00600+blue%0D%0AK01620+green%0D%0AK15893+blue%0D%0AK00058+blue%0D%0AK00306+blue%0D%0AK00928+red%0D%0AK02437+blue%0D%0AK00382+blue%0D%0AK15919+red%0D%0AK01695+blue%0D%0A
ko04911	Insulin secretion	Organismal Systems	5(0.31%)	21(0.10%)	0.00351651	0.0193076	TRIAE_CS42_U_TGACv1_640700_AA2069410,TRIAE_CS42_6DL_TGACv1_526800_AA1692210,TRIAE_CS42_6BL_TGACv1_503571_AA1628080,TRIAE_CS42_2BS_TGACv1_145867_AA0447680,TRIAE_CS42_6AL_TGACv1_474993_AA1536090,	K04515,K18211,	http://www.kegg.jp/kegg-bin/show_pathway?scale=1.0&query=&map=ko04911&use=reference&multi_query=K04515+blue%0D%0AK18211+blue%0D%0A
ko04722	Neurotrophin signaling pathway	Organismal Systems	113(7.07%)	1004(4.69%)	4.21125e-06	5.57033e-05	TRIAE_CS42_4AL_TGACv1_289116_AA0965070,TRIAE_CS42_5BL_TGACv1_405411_AA1326720,TRIAE_CS42_U_TGACv1_640700_AA2069410,TRIAE_CS42_7BS_TGACv1_591807_AA1921880,TRIAE_CS42_5BL_TGACv1_406777_AA1349730,TRIAE_CS42_5AL_TGACv1_375257_AA1218660,TRIAE_CS42_1BS_TGACv1_050264_AA0169830,TRIAE_CS42_7DS_TGACv1_622008_AA2031040,TRIAE_CS42_U_TGACv1_640842_AA2076810,TRIAE_CS42_3DS_TGACv1_274412_AA0935710,TRIAE_CS42_6D…	K04733,K04730,K04515,K02183,	http://www.kegg.jp/kegg-bin/show_pathway?scale=1.0&query=&map=ko04722&use=reference&multi_query=K04733+green%0D%0AK04730+green%0D%0AK04515+blue%0D%0AK02183+blue%0D%0A
ko04727	GABAergic synapse	Organismal Systems	16(1.00%)	106(0.50%)	0.00216982	0.0131545	TRIAE_CS42_7AL_TGACv1_557050_AA1775800,TRIAE_CS42_7BL_TGACv1_579517_AA1908080,TRIAE_CS42_4DL_TGACv1_343321_AA1133210,TRIAE_CS42_2BL_TGACv1_130804_AA0418160,TRIAE_CS42_7DS_TGACv1_625534_AA2065440,TRIAE_CS42_2AL_TGACv1_093626_AA0283990,TRIAE_CS42_7AS_TGACv1_569915_AA1826890,TRIAE_CS42_2BS_TGACv1_146792_AA0472920,TRIAE_CS42_4BL_TGACv1_320919_AA1051690,TRIAE_CS42_6AS_TGACv1_485417_AA1545070,TRIAE_CS4…	K14207,K01915,K01580,K15015,	http://www.kegg.jp/kegg-bin/show_pathway?scale=1.0&query=&map=ko04727&use=reference&multi_query=K14207+blue%0D%0AK01915+green%0D%0AK01580+blue%0D%0AK15015+blue%0D%0A
ko00981	Insect hormone biosynthesis	Metabolism	5(0.31%)	23(0.11%)	0.00575181	0.0308673	TRIAE_CS42_6AL_TGACv1_474082_AA1534040,TRIAE_CS42_6DL_TGACv1_526701_AA1690190,TRIAE_CS42_2BL_TGACv1_130904_AA0419740,TRIAE_CS42_2DL_TGACv1_158598_AA0522880,TRIAE_CS42_6BL_TGACv1_501254_AA1615300,	K00128,	http://www.kegg.jp/kegg-bin/show_pathway?scale=1.0&query=&map=ko00981&use=reference&multi_query=K00128+green%0D%0A
ko01053	Biosynthesis of siderophore group nonribosomal peptides	Metabolism	2(0.13%)	3(0.01%)	0.000416356	0.00336555	TRIAE_CS42_5AL_TGACv1_378731_AA1254400,TRIAE_CS42_5BL_TGACv1_407642_AA1358550,	K02552,	http://www.kegg.jp/kegg-bin/show_pathway?scale=1.0&query=&map=ko01053&use=reference&multi_query=K02552+blue%0D%0A
ko00073	Cutin, suberine and wax biosynthesis	Metabolism	27(1.69%)	149(0.70%)	4.97035e-06	6.28858e-05	TRIAE_CS42_2AS_TGACv1_113493_AA0356930,TRIAE_CS42_6BL_TGACv1_499702_AA1589500,TRIAE_CS42_6BS_TGACv1_513121_AA1630560,TRIAE_CS42_3B_TGACv1_220873_AA0722030,TRIAE_CS42_2AS_TGACv1_112654_AA0342930,TRIAE_CS42_2BS_TGACv1_145943_AA0450210,TRIAE_CS42_2DS_TGACv1_178705_AA0600000,TRIAE_CS42_1DL_TGACv1_064773_AA0235660,TRIAE_CS42_1BL_TGACv1_030671_AA0097460,TRIAE_CS42_3AS_TGACv1_210771_AA0678600,TRIAE_CS42…	K15400,K15404,K17991,K13356,K15402,K15398,	http://www.kegg.jp/kegg-bin/show_pathway?scale=1.0&query=&map=ko00073&use=reference&multi_query=K15400+blue%0D%0AK15404+blue%0D%0AK17991+blue%0D%0AK13356+blue%0D%0AK15402+green%0D%0AK15398+blue%0D%0A
ko05152	Tuberculosis	Human Diseases	127(7.95%)	1146(5.36%)	2.498e-06	3.63459e-05	TRIAE_CS42_4AL_TGACv1_289116_AA0965070,TRIAE_CS42_5BL_TGACv1_405411_AA1326720,TRIAE_CS42_U_TGACv1_640700_AA2069410,TRIAE_CS42_7BS_TGACv1_591807_AA1921880,TRIAE_CS42_2BS_TGACv1_145992_AA0452120,TRIAE_CS42_5BL_TGACv1_406777_AA1349730,TRIAE_CS42_5AL_TGACv1_375257_AA1218660,TRIAE_CS42_2AS_TGACv1_113054_AA0350530,TRIAE_CS42_1BS_TGACv1_050264_AA0169830,TRIAE_CS42_3B_TGACv1_223464_AA0782660,TRIAE_CS42_7…	K04733,K04730,K04515,K08065,K06268,K04077,K02183,K08064,K08066,	http://www.kegg.jp/kegg-bin/show_pathway?scale=1.0&query=&map=ko05152&use=reference&multi_query=K04733+green%0D%0AK04730+green%0D%0AK04515+blue%0D%0AK08065+blue%0D%0AK06268+blue%0D%0AK04077+red%0D%0AK02183+blue%0D%0AK08064+blue%0D%0AK08066+blue%0D%0A
ko00906	Carotenoid biosynthesis	Metabolism	15(0.94%)	107(0.50%)	0.00583402	0.0308673	TRIAE_CS42_6DL_TGACv1_527175_AA1700080,TRIAE_CS42_6BL_TGACv1_500027_AA1597560,TRIAE_CS42_2BL_TGACv1_132985_AA0440790,TRIAE_CS42_5AS_TGACv1_393034_AA1267500,TRIAE_CS42_2BL_TGACv1_129449_AA0384170,TRIAE_CS42_5DL_TGACv1_434229_AA1432100,TRIAE_CS42_6DL_TGACv1_526572_AA1687310,TRIAE_CS42_2DL_TGACv1_159392_AA0537630,TRIAE_CS42_5BL_TGACv1_404264_AA1292920,TRIAE_CS42_2DL_TGACv1_159586_AA0540210,TRIAE_CS4…	K15747,K09843,K09839,K02291,K09842,K09840,K15746,K17912,K09841,	http://www.kegg.jp/kegg-bin/show_pathway?scale=1.0&query=&map=ko00906&use=reference&multi_query=K15747+blue%0D%0AK09843+red%0D%0AK09839+blue%0D%0AK02291+blue%0D%0AK09842+green%0D%0AK09840+blue%0D%0AK15746+blue%0D%0AK17912+blue%0D%0AK09841+red%0D%0A
ko04740	Olfactory transduction	Organismal Systems	15(0.94%)	72(0.34%)	6.53609e-05	0.000576364	TRIAE_CS42_U_TGACv1_640700_AA2069410,TRIAE_CS42_6DL_TGACv1_526800_AA1692210,TRIAE_CS42_6BL_TGACv1_503571_AA1628080,TRIAE_CS42_5BL_TGACv1_404944_AA1315820,TRIAE_CS42_5DL_TGACv1_433613_AA1417700,TRIAE_CS42_2BS_TGACv1_146510_AA0467180,TRIAE_CS42_2DS_TGACv1_179422_AA0607050,TRIAE_CS42_2DS_TGACv1_179759_AA0609020,TRIAE_CS42_2AS_TGACv1_113342_AA0354730,TRIAE_CS42_5AL_TGACv1_375077_AA1215680,TRIAE_CS42_…	K04515,K02183,	http://www.kegg.jp/kegg-bin/show_pathway?scale=1.0&query=&map=ko04740&use=reference&multi_query=K04515+blue%0D%0AK02183+blue%0D%0A
ko00500	Starch and sucrose metabolism	Metabolism	85(5.32%)	617(2.88%)	1.35652e-08	3.69366e-07	TRIAE_CS42_5AL_TGACv1_376824_AA1241310,TRIAE_CS42_2BL_TGACv1_131868_AA0433080,TRIAE_CS42_3DL_TGACv1_249205_AA0841320,TRIAE_CS42_4AL_TGACv1_288169_AA0939290,TRIAE_CS42_3AL_TGACv1_195488_AA0650140,TRIAE_CS42_7AS_TGACv1_569799_AA1824210,TRIAE_CS42_2DL_TGACv1_159703_AA0541730,TRIAE_CS42_2AL_TGACv1_095974_AA0316300,TRIAE_CS42_2DS_TGACv1_177988_AA0588670,TRIAE_CS42_5BL_TGACv1_404785_AA1310760,TRIAE_CS4…	K05349,K05350,K00688,K01193,K01187,K00695,K01087,K16055,K01188,K00696,K01177,K01179,K01214,K13679,K00847,	http://www.kegg.jp/kegg-bin/show_pathway?scale=1.0&query=&map=ko00500&use=reference&multi_query=K05349+red%0D%0AK05350+green%0D%0AK00688+red%0D%0AK01193+green%0D%0AK01187+blue%0D%0AK00695+green%0D%0AK01087+blue%0D%0AK16055+blue%0D%0AK01188+green%0D%0AK00696+blue%0D%0AK01177+green%0D%0AK01179+green%0D%0AK01214+red%0D%0AK13679+blue%0D%0AK00847+blue%0D%0A
ko00680	Methane metabolism	Metabolism	29(1.81%)	198(0.93%)	0.000164081	0.00140434	TRIAE_CS42_7BL_TGACv1_577218_AA1869310,TRIAE_CS42_6BL_TGACv1_501351_AA1616370,TRIAE_CS42_6BL_TGACv1_500092_AA1598670,TRIAE_CS42_7AL_TGACv1_560290_AA1802000,TRIAE_CS42_7BS_TGACv1_592003_AA1927810,TRIAE_CS42_6DL_TGACv1_526666_AA1689390,TRIAE_CS42_4BS_TGACv1_329104_AA1097850,TRIAE_CS42_7DL_TGACv1_602640_AA1963570,TRIAE_CS42_4BL_TGACv1_321370_AA1059690,TRIAE_CS42_4AL_TGACv1_289002_AA0963160,TRIAE_CS4…	K01595,K01834,K00122,K00600,K00121,K01689,K00024,K01623,K00058,K03841,	http://www.kegg.jp/kegg-bin/show_pathway?scale=1.0&query=&map=ko00680&use=reference&multi_query=K01595+blue%0D%0AK01834+blue%0D%0AK00122+green%0D%0AK00600+blue%0D%0AK00121+green%0D%0AK01689+blue%0D%0AK00024+red%0D%0AK01623+blue%0D%0AK00058+blue%0D%0AK03841+green%0D%0A
ko05418	Fluid shear stress and atherosclerosis		106(6.63%)	555(2.59%)	4.6646e-20	1.93914e-18	TRIAE_CS42_5BL_TGACv1_407952_AA1360610,TRIAE_CS42_6BS_TGACv1_517953_AA1677300,TRIAE_CS42_5AL_TGACv1_375294_AA1219350,TRIAE_CS42_5DL_TGACv1_434088_AA1428790,TRIAE_CS42_6AS_TGACv1_488046_AA1574160,TRIAE_CS42_6DS_TGACv1_543125_AA1735830,TRIAE_CS42_1AS_TGACv1_021532_AA0081830,TRIAE_CS42_4AS_TGACv1_309924_AA1031300,TRIAE_CS42_4BS_TGACv1_327885_AA1077750,TRIAE_CS42_5BS_TGACv1_424053_AA1386470,TRIAE_CS4…	K00799,K07198,K02183,K03671,	http://www.kegg.jp/kegg-bin/show_pathway?scale=1.0&query=&map=ko05418&use=reference&multi_query=K00799+green%0D%0AK07198+green%0D%0AK02183+blue%0D%0AK03671+blue%0D%0A
ko04064	NF-kappa B signaling pathway	Environmental Information Processing	99(6.20%)	841(3.93%)	2.30596e-06	3.53176e-05	TRIAE_CS42_4AL_TGACv1_289116_AA0965070,TRIAE_CS42_5BL_TGACv1_405411_AA1326720,TRIAE_CS42_7BS_TGACv1_591807_AA1921880,TRIAE_CS42_5BL_TGACv1_406777_AA1349730,TRIAE_CS42_5AL_TGACv1_375257_AA1218660,TRIAE_CS42_1BS_TGACv1_050264_AA0169830,TRIAE_CS42_7DS_TGACv1_622008_AA2031040,TRIAE_CS42_U_TGACv1_640842_AA2076810,TRIAE_CS42_3DS_TGACv1_274412_AA0935710,TRIAE_CS42_7DS_TGACv1_622292_AA2037160,TRIAE_CS42_…	K04733,K04730,K10577,	http://www.kegg.jp/kegg-bin/show_pathway?scale=1.0&query=&map=ko04064&use=reference&multi_query=K04733+green%0D%0AK04730+green%0D%0AK10577+red%0D%0A
ko04742	Taste transduction	Organismal Systems	3(0.19%)	9(0.04%)	0.00288204	0.0164446	TRIAE_CS42_7BS_TGACv1_592113_AA1930870,TRIAE_CS42_7DS_TGACv1_622918_AA2047250,TRIAE_CS42_7AS_TGACv1_569084_AA1806860,	K04957,	http://www.kegg.jp/kegg-bin/show_pathway?scale=1.0&query=&map=ko04742&use=reference&multi_query=K04957+blue%0D%0A
ko04020	Calcium signaling pathway	Environmental Information Processing	20(1.25%)	160(0.75%)	0.00822894	0.0405868	TRIAE_CS42_U_TGACv1_640700_AA2069410,TRIAE_CS42_1DS_TGACv1_081394_AA0260470,TRIAE_CS42_3B_TGACv1_223464_AA0782660,TRIAE_CS42_6DL_TGACv1_526800_AA1692210,TRIAE_CS42_6BL_TGACv1_503571_AA1628080,TRIAE_CS42_5BL_TGACv1_404944_AA1315820,TRIAE_CS42_5DL_TGACv1_433613_AA1417700,TRIAE_CS42_2BS_TGACv1_146510_AA0467180,TRIAE_CS42_2DS_TGACv1_179422_AA0607050,TRIAE_CS42_3AS_TGACv1_210898_AA0681100,TRIAE_CS42_2…	K04515,K05857,K06268,K02183,	http://www.kegg.jp/kegg-bin/show_pathway?scale=1.0&query=&map=ko04020&use=reference&multi_query=K04515+blue%0D%0AK05857+blue%0D%0AK06268+blue%0D%0AK02183+blue%0D%0A
ko04925	Aldosterone synthesis and secretion		15(0.94%)	67(0.31%)	2.54634e-05	0.000255512	TRIAE_CS42_U_TGACv1_640700_AA2069410,TRIAE_CS42_6DL_TGACv1_526800_AA1692210,TRIAE_CS42_6BL_TGACv1_503571_AA1628080,TRIAE_CS42_5BL_TGACv1_404944_AA1315820,TRIAE_CS42_5DL_TGACv1_433613_AA1417700,TRIAE_CS42_2BS_TGACv1_146510_AA0467180,TRIAE_CS42_2DS_TGACv1_179422_AA0607050,TRIAE_CS42_2DS_TGACv1_179759_AA0609020,TRIAE_CS42_2AS_TGACv1_113342_AA0354730,TRIAE_CS42_5AL_TGACv1_375077_AA1215680,TRIAE_CS42_…	K04515,K02183,	http://www.kegg.jp/kegg-bin/show_pathway?scale=1.0&query=&map=ko04925&use=reference&multi_query=K04515+blue%0D%0AK02183+blue%0D%0A
ko05111	Biofilm formation - Vibrio cholerae	Human Diseases	6(0.38%)	10(0.05%)	1.25926e-06	2.15556e-05	TRIAE_CS42_4BL_TGACv1_320503_AA1041790,TRIAE_CS42_3DL_TGACv1_250863_AA0874350,TRIAE_CS42_4AS_TGACv1_306669_AA1011840,TRIAE_CS42_3AL_TGACv1_194189_AA0628150,TRIAE_CS42_4DL_TGACv1_343055_AA1128650,TRIAE_CS42_3B_TGACv1_227606_AA0824050,	K00640,	http://www.kegg.jp/kegg-bin/show_pathway?scale=1.0&query=&map=ko05111&use=reference&multi_query=K00640+green%0D%0A
ko00402	Benzoxazinoid biosynthesis	Metabolism	7(0.44%)	33(0.15%)	0.00244736	0.0145343	TRIAE_CS42_5DS_TGACv1_456522_AA1472960,TRIAE_CS42_5DS_TGACv1_456522_AA1472950,TRIAE_CS42_5AS_TGACv1_392955_AA1266790,TRIAE_CS42_5DL_TGACv1_439685_AA1469020,TRIAE_CS42_2BS_TGACv1_147579_AA0485110,TRIAE_CS42_5BS_TGACv1_423592_AA1380200,TRIAE_CS42_2DS_TGACv1_177371_AA0574830,	K13224,K13229,	http://www.kegg.jp/kegg-bin/show_pathway?scale=1.0&query=&map=ko00402&use=reference&multi_query=K13224+red%0D%0AK13229+blue%0D%0A
ko04970	Salivary secretion	Organismal Systems	11(0.69%)	61(0.29%)	0.00163319	0.0101119	TRIAE_CS42_5BL_TGACv1_404944_AA1315820,TRIAE_CS42_5DL_TGACv1_433613_AA1417700,TRIAE_CS42_2BS_TGACv1_146510_AA0467180,TRIAE_CS42_2DS_TGACv1_179422_AA0607050,TRIAE_CS42_2DS_TGACv1_179759_AA0609020,TRIAE_CS42_2AS_TGACv1_113342_AA0354730,TRIAE_CS42_5AL_TGACv1_375077_AA1215680,TRIAE_CS42_1DL_TGACv1_061368_AA0193230,TRIAE_CS42_1AL_TGACv1_003156_AA0048350,TRIAE_CS42_7DL_TGACv1_603368_AA1982020,TRIAE_CS4…	K02183,	http://www.kegg.jp/kegg-bin/show_pathway?scale=1.0&query=&map=ko04970&use=reference&multi_query=K02183+blue%0D%0A
ko00430	Taurine and hypotaurine metabolism	Metabolism	9(0.56%)	43(0.20%)	0.00103241	0.0069868	TRIAE_CS42_2AL_TGACv1_096927_AA0322120,TRIAE_CS42_2DL_TGACv1_162097_AA0561770,TRIAE_CS42_2BL_TGACv1_130804_AA0418160,TRIAE_CS42_2BL_TGACv1_129468_AA0385020,TRIAE_CS42_2AL_TGACv1_093626_AA0283990,TRIAE_CS42_3B_TGACv1_221012_AA0727030,TRIAE_CS42_3DS_TGACv1_271658_AA0904930,TRIAE_CS42_3AS_TGACv1_211899_AA0695380,TRIAE_CS42_2DL_TGACv1_159647_AA0540930,	K18592,K01580,K00681,	http://www.kegg.jp/kegg-bin/show_pathway?scale=1.0&query=&map=ko00430&use=reference&multi_query=K18592+blue%0D%0AK01580+blue%0D%0AK00681+blue%0D%0A
ko00460	Cyanoamino acid metabolism	Metabolism	40(2.50%)	240(1.12%)	5.18282e-07	1.07728e-05	TRIAE_CS42_5AL_TGACv1_376824_AA1241310,TRIAE_CS42_2BL_TGACv1_131868_AA0433080,TRIAE_CS42_2AL_TGACv1_096927_AA0322120,TRIAE_CS42_5BL_TGACv1_404561_AA1304210,TRIAE_CS42_2DS_TGACv1_178360_AA0594530,TRIAE_CS42_4BS_TGACv1_329104_AA1097850,TRIAE_CS42_2DL_TGACv1_160035_AA0545840,TRIAE_CS42_2DL_TGACv1_162097_AA0561770,TRIAE_CS42_2AL_TGACv1_095348_AA0309770,TRIAE_CS42_2BL_TGACv1_129468_AA0385020,TRIAE_CS4…	K05349,K05350,K18592,K01188,K00600,K00681,K13027,	http://www.kegg.jp/kegg-bin/show_pathway?scale=1.0&query=&map=ko00460&use=reference&multi_query=K05349+red%0D%0AK05350+green%0D%0AK18592+blue%0D%0AK01188+green%0D%0AK00600+blue%0D%0AK00681+blue%0D%0AK13027+blue%0D%0A
ko00908	Zeatin biosynthesis	Metabolism	20(1.25%)	100(0.47%)	1.27772e-05	0.000143006	TRIAE_CS42_7BL_TGACv1_577044_AA1863860,TRIAE_CS42_2DL_TGACv1_159812_AA0543040,TRIAE_CS42_2DL_TGACv1_161646_AA0559770,TRIAE_CS42_5AL_TGACv1_374840_AA1209960,TRIAE_CS42_5DL_TGACv1_433102_AA1402060,TRIAE_CS42_1AL_TGACv1_002153_AA0039220,TRIAE_CS42_5DL_TGACv1_433534_AA1415760,TRIAE_CS42_U_TGACv1_642023_AA2109730,TRIAE_CS42_7DL_TGACv1_603226_AA1978770,TRIAE_CS42_U_TGACv1_642023_AA2109740,TRIAE_CS42_7A…	K13495,K10760,K00279,K10717,	http://www.kegg.jp/kegg-bin/show_pathway?scale=1.0&query=&map=ko00908&use=reference&multi_query=K13495+green%0D%0AK10760+blue%0D%0AK00279+green%0D%0AK10717+blue%0D%0A
ko00196	Photosynthesis - antenna proteins	Metabolism	21(1.31%)	88(0.41%)	3.54403e-07	7.93317e-06	TRIAE_CS42_4AL_TGACv1_291250_AA0993200,TRIAE_CS42_6AS_TGACv1_486466_AA1561480,TRIAE_CS42_6DL_TGACv1_528327_AA1713280,TRIAE_CS42_7DS_TGACv1_625332_AA2064910,TRIAE_CS42_1DL_TGACv1_062737_AA0219050,TRIAE_CS42_2BS_TGACv1_147491_AA0483780,TRIAE_CS42_5AL_TGACv1_374690_AA1206680,TRIAE_CS42_2AS_TGACv1_113596_AA0358300,TRIAE_CS42_2AS_TGACv1_112955_AA0348610,TRIAE_CS42_1BL_TGACv1_032695_AA0133030,TRIAE_CS4…	K08916,K08909,K08911,K08912,K08915,K08910,K08914,	http://www.kegg.jp/kegg-bin/show_pathway?scale=1.0&query=&map=ko00196&use=reference&multi_query=K08916+blue%0D%0AK08909+blue%0D%0AK08911+blue%0D%0AK08912+green%0D%0AK08915+blue%0D%0AK08910+blue%0D%0AK08914+blue%0D%0A
ko00625	Chloroalkane and chloroalkene degradation	Metabolism	8(0.50%)	42(0.20%)	0.00332059	0.0185825	TRIAE_CS42_4BL_TGACv1_321370_AA1059690,TRIAE_CS42_6AL_TGACv1_474082_AA1534040,TRIAE_CS42_6DL_TGACv1_526701_AA1690190,TRIAE_CS42_2BL_TGACv1_130904_AA0419740,TRIAE_CS42_4AL_TGACv1_289132_AA0965420,TRIAE_CS42_2DS_TGACv1_180242_AA0610540,TRIAE_CS42_2DL_TGACv1_158598_AA0522880,TRIAE_CS42_6BL_TGACv1_501254_AA1615300,	K00121,K00128,	http://www.kegg.jp/kegg-bin/show_pathway?scale=1.0&query=&map=ko00625&use=reference&multi_query=K00121+green%0D%0AK00128+green%0D%0A
ko05031	Amphetamine addiction	Human Diseases	19(1.19%)	129(0.60%)	0.00142384	0.00931582	TRIAE_CS42_U_TGACv1_640700_AA2069410,TRIAE_CS42_3B_TGACv1_223464_AA0782660,TRIAE_CS42_6DL_TGACv1_526800_AA1692210,TRIAE_CS42_6BL_TGACv1_503571_AA1628080,TRIAE_CS42_5BL_TGACv1_404944_AA1315820,TRIAE_CS42_5DL_TGACv1_433613_AA1417700,TRIAE_CS42_2BS_TGACv1_146510_AA0467180,TRIAE_CS42_2DS_TGACv1_179422_AA0607050,TRIAE_CS42_3AS_TGACv1_210898_AA0681100,TRIAE_CS42_2DS_TGACv1_179759_AA0609020,TRIAE_CS42_1…	K04515,K06268,K02183,	http://www.kegg.jp/kegg-bin/show_pathway?scale=1.0&query=&map=ko05031&use=reference&multi_query=K04515+blue%0D%0AK06268+blue%0D%0AK02183+blue%0D%0A
ko04745	Phototransduction - fly	Organismal Systems	15(0.94%)	71(0.33%)	5.45801e-05	0.000512349	TRIAE_CS42_U_TGACv1_640700_AA2069410,TRIAE_CS42_6DL_TGACv1_526800_AA1692210,TRIAE_CS42_6BL_TGACv1_503571_AA1628080,TRIAE_CS42_5BL_TGACv1_404944_AA1315820,TRIAE_CS42_5DL_TGACv1_433613_AA1417700,TRIAE_CS42_2BS_TGACv1_146510_AA0467180,TRIAE_CS42_2DS_TGACv1_179422_AA0607050,TRIAE_CS42_2DS_TGACv1_179759_AA0609020,TRIAE_CS42_2AS_TGACv1_113342_AA0354730,TRIAE_CS42_5AL_TGACv1_375077_AA1215680,TRIAE_CS42_…	K04515,K02183,	http://www.kegg.jp/kegg-bin/show_pathway?scale=1.0&query=&map=ko04745&use=reference&multi_query=K04515+blue%0D%0AK02183+blue%0D%0A
ko04016	MAPK signaling pathway - plant		62(3.88%)	452(2.11%)	1.17676e-06	2.14023e-05	TRIAE_CS42_7BS_TGACv1_592288_AA1935050,TRIAE_CS42_2DL_TGACv1_157956_AA0503340,TRIAE_CS42_2BL_TGACv1_130949_AA0420400,TRIAE_CS42_5BS_TGACv1_424330_AA1388810,TRIAE_CS42_2AL_TGACv1_099043_AA0326880,TRIAE_CS42_4AS_TGACv1_307260_AA1018970,TRIAE_CS42_5DS_TGACv1_456548_AA1473890,TRIAE_CS42_4DL_TGACv1_343052_AA1128600,TRIAE_CS42_4BL_TGACv1_320253_AA1032530,TRIAE_CS42_4BL_TGACv1_320451_AA1039710,TRIAE_CS4…	K13449,K17686,K14498,K14496,K03781,K14514,K13447,K13420,K13424,K02183,K14516,K13425,K14497,	http://www.kegg.jp/kegg-bin/show_pathway?scale=1.0&query=&map=ko04016&use=reference&multi_query=K13449+green%0D%0AK17686+blue%0D%0AK14498+green%0D%0AK14496+blue%0D%0AK03781+blue%0D%0AK14514+blue%0D%0AK13447+blue%0D%0AK13420+blue%0D%0AK13424+green%0D%0AK02183+blue%0D%0AK14516+red%0D%0AK13425+blue%0D%0AK14497+red%0D%0A
ko00980	Metabolism of xenobiotics by cytochrome P450	Metabolism	85(5.32%)	292(1.37%)	1.66113e-29	1.6113e-27	TRIAE_CS42_5BL_TGACv1_407952_AA1360610,TRIAE_CS42_6BS_TGACv1_517953_AA1677300,TRIAE_CS42_5AL_TGACv1_375294_AA1219350,TRIAE_CS42_5DL_TGACv1_434088_AA1428790,TRIAE_CS42_6AS_TGACv1_488046_AA1574160,TRIAE_CS42_6DS_TGACv1_543125_AA1735830,TRIAE_CS42_1AS_TGACv1_021532_AA0081830,TRIAE_CS42_4AS_TGACv1_309924_AA1031300,TRIAE_CS42_4BS_TGACv1_327885_AA1077750,TRIAE_CS42_5BS_TGACv1_424053_AA1386470,TRIAE_CS4…	K00799,K00121,	http://www.kegg.jp/kegg-bin/show_pathway?scale=1.0&query=&map=ko00980&use=reference&multi_query=K00799+green%0D%0AK00121+green%0D%0A
ko00380	Tryptophan metabolism	Metabolism	24(1.50%)	163(0.76%)	0.00045976	0.00361595	TRIAE_CS42_5DL_TGACv1_435700_AA1453740,TRIAE_CS42_4BL_TGACv1_320451_AA1039710,TRIAE_CS42_2AS_TGACv1_114566_AA0368050,TRIAE_CS42_5DL_TGACv1_433222_AA1406100,TRIAE_CS42_5AL_TGACv1_379342_AA1256110,TRIAE_CS42_5AL_TGACv1_376998_AA1243100,TRIAE_CS42_5DL_TGACv1_433226_AA1406250,TRIAE_CS42_5AL_TGACv1_376544_AA1238210,TRIAE_CS42_5AL_TGACv1_379839_AA1256950,TRIAE_CS42_5DL_TGACv1_433729_AA1420760,TRIAE_CS4…	K11817,K03781,K01426,K11820,K00128,K11816,K16903,	http://www.kegg.jp/kegg-bin/show_pathway?scale=1.0&query=&map=ko00380&use=reference&multi_query=K11817+green%0D%0AK03781+blue%0D%0AK01426+blue%0D%0AK11820+red%0D%0AK00128+green%0D%0AK11816+blue%0D%0AK16903+blue%0D%0A
ko00904	Diterpenoid biosynthesis	Metabolism	17(1.06%)	131(0.61%)	0.0087285	0.0423332	TRIAE_CS42_3AL_TGACv1_195097_AA0644720,TRIAE_CS42_2AL_TGACv1_093213_AA0275220,TRIAE_CS42_3DL_TGACv1_250562_AA0870310,TRIAE_CS42_2DL_TGACv1_159593_AA0540370,TRIAE_CS42_3B_TGACv1_222891_AA0772640,TRIAE_CS42_6DL_TGACv1_526414_AA1682800,TRIAE_CS42_3B_TGACv1_222180_AA0759040,TRIAE_CS42_2BL_TGACv1_129413_AA0382670,TRIAE_CS42_1AL_TGACv1_000229_AA0006730,TRIAE_CS42_3DS_TGACv1_273136_AA0928740,TRIAE_CS42_…	K04125,K16085,K13070,K04123,K04124,K14046,	http://www.kegg.jp/kegg-bin/show_pathway?scale=1.0&query=&map=ko00904&use=reference&multi_query=K04125+green%0D%0AK16085+green%0D%0AK13070+blue%0D%0AK04123+red%0D%0AK04124+blue%0D%0AK14046+red%0D%0A
ko04971	Gastric acid secretion	Organismal Systems	15(0.94%)	68(0.32%)	3.10109e-05	0.000300806	TRIAE_CS42_U_TGACv1_640700_AA2069410,TRIAE_CS42_6DL_TGACv1_526800_AA1692210,TRIAE_CS42_6BL_TGACv1_503571_AA1628080,TRIAE_CS42_5BL_TGACv1_404944_AA1315820,TRIAE_CS42_5DL_TGACv1_433613_AA1417700,TRIAE_CS42_2BS_TGACv1_146510_AA0467180,TRIAE_CS42_2DS_TGACv1_179422_AA0607050,TRIAE_CS42_2DS_TGACv1_179759_AA0609020,TRIAE_CS42_2AS_TGACv1_113342_AA0354730,TRIAE_CS42_5AL_TGACv1_375077_AA1215680,TRIAE_CS42_…	K04515,K02183,	http://www.kegg.jp/kegg-bin/show_pathway?scale=1.0&query=&map=ko04971&use=reference&multi_query=K04515+blue%0D%0AK02183+blue%0D%0A
ko00940	Phenylpropanoid biosynthesis	Metabolism	186(11.64%)	1111(5.19%)	7.17184e-27	5.21751e-25	TRIAE_CS42_2DS_TGACv1_179032_AA0603750,TRIAE_CS42_5AL_TGACv1_376824_AA1241310,TRIAE_CS42_7BL_TGACv1_576756_AA1853930,TRIAE_CS42_4AL_TGACv1_288907_AA0961090,TRIAE_CS42_2AS_TGACv1_113088_AA0351060,TRIAE_CS42_2AL_TGACv1_094687_AA0301520,TRIAE_CS42_2BL_TGACv1_130522_AA0412780,TRIAE_CS42_2AS_TGACv1_113572_AA0358040,TRIAE_CS42_2AS_TGACv1_112491_AA0339140,TRIAE_CS42_4AL_TGACv1_296881_AA1002440,TRIAE_CS4…	K00430,K05349,K06892,K05350,K13064,K13065,K09755,K01188,K00083,K10775,K09753,K11188,K13066,K12355,	http://www.kegg.jp/kegg-bin/show_pathway?scale=1.0&query=&map=ko00940&use=reference&multi_query=K00430+green%0D%0AK05349+red%0D%0AK06892+blue%0D%0AK05350+green%0D%0AK13064+blue%0D%0AK13065+blue%0D%0AK09755+green%0D%0AK01188+green%0D%0AK00083+green%0D%0AK10775+red%0D%0AK09753+green%0D%0AK11188+blue%0D%0AK13066+red%0D%0AK12355+green%0D%0A
ko00910	Nitrogen metabolism	Metabolism	24(1.50%)	165(0.77%)	0.00055351	0.00413004	TRIAE_CS42_6BL_TGACv1_499968_AA1596170,TRIAE_CS42_6AL_TGACv1_472117_AA1517910,TRIAE_CS42_6DS_TGACv1_543770_AA1744010,TRIAE_CS42_7DL_TGACv1_602668_AA1964740,TRIAE_CS42_6DL_TGACv1_526318_AA1679410,TRIAE_CS42_7BL_TGACv1_576851_AA1857420,TRIAE_CS42_7BL_TGACv1_576824_AA1856180,TRIAE_CS42_6AL_TGACv1_471208_AA1504680,TRIAE_CS42_4DL_TGACv1_343321_AA1133210,TRIAE_CS42_4BL_TGACv1_320919_AA1051690,TRIAE_CS4…	K00366,K10534,K01673,K01915,K02575,K00264,K01674,K01725,	http://www.kegg.jp/kegg-bin/show_pathway?scale=1.0&query=&map=ko00910&use=reference&multi_query=K00366+blue%0D%0AK10534+blue%0D%0AK01673+green%0D%0AK01915+green%0D%0AK02575+green%0D%0AK00264+blue%0D%0AK01674+red%0D%0AK01725+red%0D%0A
ko01524	Platinum drug resistance		89(5.57%)	418(1.95%)	2.59466e-20	1.25841e-18	TRIAE_CS42_5BL_TGACv1_407952_AA1360610,TRIAE_CS42_6BS_TGACv1_517953_AA1677300,TRIAE_CS42_5AL_TGACv1_375294_AA1219350,TRIAE_CS42_2DL_TGACv1_157956_AA0503340,TRIAE_CS42_2BL_TGACv1_130949_AA0420400,TRIAE_CS42_5DL_TGACv1_434088_AA1428790,TRIAE_CS42_2AL_TGACv1_099043_AA0326880,TRIAE_CS42_6AS_TGACv1_488046_AA1574160,TRIAE_CS42_6DS_TGACv1_543125_AA1735830,TRIAE_CS42_1AS_TGACv1_021532_AA0081830,TRIAE_CS4…	K00799,K17686,K03164,	http://www.kegg.jp/kegg-bin/show_pathway?scale=1.0&query=&map=ko01524&use=reference&multi_query=K00799+green%0D%0AK17686+blue%0D%0AK03164+blue%0D%0A
ko04744	Phototransduction	Organismal Systems	12(0.75%)	61(0.29%)	0.000477525	0.00365684	TRIAE_CS42_5BL_TGACv1_404944_AA1315820,TRIAE_CS42_5DL_TGACv1_433613_AA1417700,TRIAE_CS42_2BS_TGACv1_146510_AA0467180,TRIAE_CS42_2DS_TGACv1_179422_AA0607050,TRIAE_CS42_2DS_TGACv1_179759_AA0609020,TRIAE_CS42_2AS_TGACv1_113342_AA0354730,TRIAE_CS42_5DS_TGACv1_457273_AA1484520,TRIAE_CS42_5AL_TGACv1_375077_AA1215680,TRIAE_CS42_1DL_TGACv1_061368_AA0193230,TRIAE_CS42_1AL_TGACv1_003156_AA0048350,TRIAE_CS4…	K02183,K00909,	http://www.kegg.jp/kegg-bin/show_pathway?scale=1.0&query=&map=ko04744&use=reference&multi_query=K02183+blue%0D%0AK00909+red%0D%0A
ko05142	Chagas disease (American trypanosomiasis)	Human Diseases	100(6.26%)	900(4.21%)	2.41536e-05	0.000251024	TRIAE_CS42_4AL_TGACv1_289116_AA0965070,TRIAE_CS42_5BL_TGACv1_405411_AA1326720,TRIAE_CS42_7BS_TGACv1_591807_AA1921880,TRIAE_CS42_5BL_TGACv1_406777_AA1349730,TRIAE_CS42_5AL_TGACv1_375257_AA1218660,TRIAE_CS42_1BS_TGACv1_050264_AA0169830,TRIAE_CS42_7DS_TGACv1_622008_AA2031040,TRIAE_CS42_U_TGACv1_640842_AA2076810,TRIAE_CS42_3DS_TGACv1_274412_AA0935710,TRIAE_CS42_7DS_TGACv1_622292_AA2037160,TRIAE_CS42_…	K04733,K04730,K08057,	http://www.kegg.jp/kegg-bin/show_pathway?scale=1.0&query=&map=ko05142&use=reference&multi_query=K04733+green%0D%0AK04730+green%0D%0AK08057+red%0D%0A
ko00982	Drug metabolism - cytochrome P450	Metabolism	92(5.76%)	331(1.55%)	4.55452e-30	1.01234e-27	TRIAE_CS42_5BL_TGACv1_407952_AA1360610,TRIAE_CS42_6BS_TGACv1_517953_AA1677300,TRIAE_CS42_5AL_TGACv1_375294_AA1219350,TRIAE_CS42_5DL_TGACv1_434088_AA1428790,TRIAE_CS42_6AS_TGACv1_488046_AA1574160,TRIAE_CS42_6DS_TGACv1_543125_AA1735830,TRIAE_CS42_1AS_TGACv1_021532_AA0081830,TRIAE_CS42_4AS_TGACv1_309924_AA1031300,TRIAE_CS42_4BS_TGACv1_327885_AA1077750,TRIAE_CS42_5BS_TGACv1_424053_AA1386470,TRIAE_CS4…	K00799,K00485,K00121,	http://www.kegg.jp/kegg-bin/show_pathway?scale=1.0&query=&map=ko00982&use=reference&multi_query=K00799+green%0D%0AK00485+green%0D%0AK00121+green%0D%0A
ko00480	Glutathione metabolism	Metabolism	101(6.32%)	438(2.05%)	1.14069e-25	6.63881e-24	TRIAE_CS42_5BL_TGACv1_407952_AA1360610,TRIAE_CS42_6BS_TGACv1_517953_AA1677300,TRIAE_CS42_5AL_TGACv1_375294_AA1219350,TRIAE_CS42_5DL_TGACv1_434088_AA1428790,TRIAE_CS42_6AS_TGACv1_488046_AA1574160,TRIAE_CS42_6DS_TGACv1_543125_AA1735830,TRIAE_CS42_1AS_TGACv1_021532_AA0081830,TRIAE_CS42_7AL_TGACv1_556691_AA1768950,TRIAE_CS42_4AS_TGACv1_309924_AA1031300,TRIAE_CS42_4BS_TGACv1_327885_AA1077750,TRIAE_CS4…	K00799,K01920,K18592,K00434,K00681,K01581,K01255,	http://www.kegg.jp/kegg-bin/show_pathway?scale=1.0&query=&map=ko00480&use=reference&multi_query=K00799+green%0D%0AK01920+blue%0D%0AK18592+blue%0D%0AK00434+blue%0D%0AK00681+blue%0D%0AK01581+red%0D%0AK01255+green%0D%0A
ko05204	Chemical carcinogenesis	Human Diseases	86(5.38%)	295(1.38%)	6.95763e-30	1.01234e-27	TRIAE_CS42_5BL_TGACv1_407952_AA1360610,TRIAE_CS42_6BS_TGACv1_517953_AA1677300,TRIAE_CS42_5AL_TGACv1_375294_AA1219350,TRIAE_CS42_5DL_TGACv1_434088_AA1428790,TRIAE_CS42_6AS_TGACv1_488046_AA1574160,TRIAE_CS42_6DS_TGACv1_543125_AA1735830,TRIAE_CS42_1AS_TGACv1_021532_AA0081830,TRIAE_CS42_4AS_TGACv1_309924_AA1031300,TRIAE_CS42_4BS_TGACv1_327885_AA1077750,TRIAE_CS42_5BS_TGACv1_424053_AA1386470,TRIAE_CS4…	K00799,K00121,K07424,	http://www.kegg.jp/kegg-bin/show_pathway?scale=1.0&query=&map=ko05204&use=reference&multi_query=K00799+green%0D%0AK00121+green%0D%0AK07424+red%0D%0A
ko04620	Toll-like receptor signaling pathway	Organismal Systems	98(6.13%)	898(4.20%)	5.81884e-05	0.000529151	TRIAE_CS42_4AL_TGACv1_289116_AA0965070,TRIAE_CS42_5BL_TGACv1_405411_AA1326720,TRIAE_CS42_7BS_TGACv1_591807_AA1921880,TRIAE_CS42_5BL_TGACv1_406777_AA1349730,TRIAE_CS42_5AL_TGACv1_375257_AA1218660,TRIAE_CS42_1BS_TGACv1_050264_AA0169830,TRIAE_CS42_7DS_TGACv1_622008_AA2031040,TRIAE_CS42_U_TGACv1_640842_AA2076810,TRIAE_CS42_3DS_TGACv1_274412_AA0935710,TRIAE_CS42_7DS_TGACv1_622292_AA2037160,TRIAE_CS42_…	K04733,K04730,	http://www.kegg.jp/kegg-bin/show_pathway?scale=1.0&query=&map=ko04620&use=reference&multi_query=K04733+green%0D%0AK04730+green%0D%0A
ko00905	Brassinosteroid biosynthesis	Metabolism	12(0.75%)	69(0.32%)	0.00160972	0.0101119	TRIAE_CS42_3AS_TGACv1_211081_AA0684710,TRIAE_CS42_2AS_TGACv1_112079_AA0329750,TRIAE_CS42_3B_TGACv1_224881_AA0802740,TRIAE_CS42_7DS_TGACv1_623368_AA2052510,TRIAE_CS42_3B_TGACv1_224749_AA0801000,TRIAE_CS42_3DS_TGACv1_272229_AA0917310,TRIAE_CS42_2AS_TGACv1_112707_AA0343770,TRIAE_CS42_6AS_TGACv1_485965_AA1554930,TRIAE_CS42_2BS_TGACv1_146175_AA0457360,TRIAE_CS42_6DS_TGACv1_543283_AA1738020,TRIAE_CS42_…	K09589,K15639,	http://www.kegg.jp/kegg-bin/show_pathway?scale=1.0&query=&map=ko00905&use=reference&multi_query=K09589+blue%0D%0AK15639+green%0D%0A
ko00630	Glyoxylate and dicarboxylate metabolism	Metabolism	36(2.25%)	231(1.08%)	8.55632e-06	0.000103745	TRIAE_CS42_6BL_TGACv1_500092_AA1598670,TRIAE_CS42_4BL_TGACv1_320451_AA1039710,TRIAE_CS42_7BS_TGACv1_592003_AA1927810,TRIAE_CS42_4BS_TGACv1_329104_AA1097850,TRIAE_CS42_4DL_TGACv1_343321_AA1133210,TRIAE_CS42_6DS_TGACv1_543041_AA1734480,TRIAE_CS42_2DS_TGACv1_177171_AA0567540,TRIAE_CS42_4BL_TGACv1_320919_AA1051690,TRIAE_CS42_4AS_TGACv1_307728_AA1023060,TRIAE_CS42_U_TGACv1_642847_AA2124040,TRIAE_CS42_…	K00122,K03781,K00600,K01915,K15893,K01602,K00024,K19269,K11517,K02437,K00382,K15919,	http://www.kegg.jp/kegg-bin/show_pathway?scale=1.0&query=&map=ko00630&use=reference&multi_query=K00122+green%0D%0AK03781+blue%0D%0AK00600+blue%0D%0AK01915+green%0D%0AK15893+blue%0D%0AK01602+green%0D%0AK00024+red%0D%0AK19269+blue%0D%0AK11517+blue%0D%0AK02437+blue%0D%0AK00382+blue%0D%0AK15919+red%0D%0A
ko04976	Bile secretion	Organismal Systems	14(0.88%)	104(0.49%)	0.0103271	0.0492654	TRIAE_CS42_2BS_TGACv1_146482_AA0466120,TRIAE_CS42_3DL_TGACv1_250186_AA0863800,TRIAE_CS42_3AL_TGACv1_197238_AA0665540,TRIAE_CS42_5DL_TGACv1_434109_AA1429510,TRIAE_CS42_3DL_TGACv1_249959_AA0859170,TRIAE_CS42_3AL_TGACv1_193952_AA0623370,TRIAE_CS42_2BS_TGACv1_146482_AA0466090,TRIAE_CS42_2DS_TGACv1_177392_AA0575390,TRIAE_CS42_3B_TGACv1_222779_AA0770480,TRIAE_CS42_6BS_TGACv1_515353_AA1669530,TRIAE_CS42…	K05658,	http://www.kegg.jp/kegg-bin/show_pathway?scale=1.0&query=&map=ko04976&use=reference&multi_query=K05658+green%0D%0A
ko05162	Measles	Human Diseases	99(6.20%)	936(4.38%)	0.00017434	0.00144952	TRIAE_CS42_4AL_TGACv1_289116_AA0965070,TRIAE_CS42_5BL_TGACv1_405411_AA1326720,TRIAE_CS42_7BS_TGACv1_591807_AA1921880,TRIAE_CS42_5BL_TGACv1_406777_AA1349730,TRIAE_CS42_5AL_TGACv1_375257_AA1218660,TRIAE_CS42_1BS_TGACv1_050264_AA0169830,TRIAE_CS42_7DS_TGACv1_622008_AA2031040,TRIAE_CS42_U_TGACv1_640842_AA2076810,TRIAE_CS42_3DS_TGACv1_274412_AA0935710,TRIAE_CS42_7DS_TGACv1_622292_AA2037160,TRIAE_CS42_…	K04733,K04730,K03283,	http://www.kegg.jp/kegg-bin/show_pathway?scale=1.0&query=&map=ko05162&use=reference&multi_query=K04733+green%0D%0AK04730+green%0D%0AK03283+blue%0D%0A
ko04621	NOD-like receptor signaling pathway	Organismal Systems	74(4.63%)	693(3.24%)	0.000758028	0.00538015	TRIAE_CS42_4AL_TGACv1_289116_AA0965070,TRIAE_CS42_7BS_TGACv1_591807_AA1921880,TRIAE_CS42_5BL_TGACv1_406777_AA1349730,TRIAE_CS42_1BS_TGACv1_050264_AA0169830,TRIAE_CS42_7DS_TGACv1_622008_AA2031040,TRIAE_CS42_U_TGACv1_640842_AA2076810,TRIAE_CS42_3DS_TGACv1_274412_AA0935710,TRIAE_CS42_7DS_TGACv1_622292_AA2037160,TRIAE_CS42_7AS_TGACv1_569170_AA1809040,TRIAE_CS42_U_TGACv1_640735_AA2071780,TRIAE_CS42_4A…	K04733,K03671,	http://www.kegg.jp/kegg-bin/show_pathway?scale=1.0&query=&map=ko04621&use=reference&multi_query=K04733+green%0D%0AK03671+blue%0D%0A
ko05133	Pertussis	Human Diseases	110(6.88%)	945(4.42%)	1.15294e-06	2.14023e-05	TRIAE_CS42_4AL_TGACv1_289116_AA0965070,TRIAE_CS42_5BL_TGACv1_405411_AA1326720,TRIAE_CS42_7BS_TGACv1_591807_AA1921880,TRIAE_CS42_5BL_TGACv1_406777_AA1349730,TRIAE_CS42_5AL_TGACv1_375257_AA1218660,TRIAE_CS42_1BS_TGACv1_050264_AA0169830,TRIAE_CS42_7DS_TGACv1_622008_AA2031040,TRIAE_CS42_U_TGACv1_640842_AA2076810,TRIAE_CS42_3DS_TGACv1_274412_AA0935710,TRIAE_CS42_7DS_TGACv1_622292_AA2037160,TRIAE_CS42_…	K04733,K04730,K02183,K05765,	http://www.kegg.jp/kegg-bin/show_pathway?scale=1.0&query=&map=ko05133&use=reference&multi_query=K04733+green%0D%0AK04730+green%0D%0AK02183+blue%0D%0AK05765+red%0D%0A
ko04075	Plant hormone signal transduction	Environmental Information Processing	116(7.26%)	898(4.20%)	1.95379e-09	6.31726e-08	TRIAE_CS42_7BS_TGACv1_592288_AA1935050,TRIAE_CS42_7BL_TGACv1_576891_AA1858830,TRIAE_CS42_7AL_TGACv1_557197_AA1777940,TRIAE_CS42_3AL_TGACv1_196057_AA0656900,TRIAE_CS42_5BS_TGACv1_424330_AA1388810,TRIAE_CS42_7DL_TGACv1_602605_AA1962370,TRIAE_CS42_5BL_TGACv1_404323_AA1295530,TRIAE_CS42_2BS_TGACv1_146679_AA0470560,TRIAE_CS42_1DL_TGACv1_062019_AA0207490,TRIAE_CS42_4AS_TGACv1_307260_AA1018970,TRIAE_CS4…	K13449,K14504,K14491,K14498,K14431,K14487,K14496,K14488,K14432,K14514,K14489,K13946,K13464,K14486,K14484,K14495,K14516,K16189,K14492,K14500,K14497,	http://www.kegg.jp/kegg-bin/show_pathway?scale=1.0&query=&map=ko04075&use=reference&multi_query=K13449+green%0D%0AK14504+green%0D%0AK14491+green%0D%0AK14498+green%0D%0AK14431+blue%0D%0AK14487+green%0D%0AK14496+blue%0D%0AK14488+blue%0D%0AK14432+blue%0D%0AK14514+blue%0D%0AK14489+blue%0D%0AK13946+green%0D%0AK13464+red%0D%0AK14486+green%0D%0AK14484+red%0D%0AK14495+blue%0D%0AK14516+red%0D%0AK16189+blu…
ko04750	Inflammatory mediator regulation of TRP channels	Organismal Systems	15(0.94%)	90(0.42%)	0.000953199	0.00660431	TRIAE_CS42_U_TGACv1_640700_AA2069410,TRIAE_CS42_6DL_TGACv1_526800_AA1692210,TRIAE_CS42_6BL_TGACv1_503571_AA1628080,TRIAE_CS42_5BL_TGACv1_404944_AA1315820,TRIAE_CS42_5DL_TGACv1_433613_AA1417700,TRIAE_CS42_2BS_TGACv1_146510_AA0467180,TRIAE_CS42_2DS_TGACv1_179422_AA0607050,TRIAE_CS42_2DS_TGACv1_179759_AA0609020,TRIAE_CS42_2AS_TGACv1_113342_AA0354730,TRIAE_CS42_5AL_TGACv1_375077_AA1215680,TRIAE_CS42_…	K04515,K02183,	http://www.kegg.jp/kegg-bin/show_pathway?scale=1.0&query=&map=ko04750&use=reference&multi_query=K04515+blue%0D%0AK02183+blue%0D%0A
ko04624	Toll and Imd signaling pathway		100(6.26%)	861(4.03%)	3.73516e-06	5.17586e-05	TRIAE_CS42_4AL_TGACv1_289116_AA0965070,TRIAE_CS42_5BL_TGACv1_405411_AA1326720,TRIAE_CS42_7BS_TGACv1_591807_AA1921880,TRIAE_CS42_5BL_TGACv1_406777_AA1349730,TRIAE_CS42_5AL_TGACv1_375257_AA1218660,TRIAE_CS42_1BS_TGACv1_050264_AA0169830,TRIAE_CS42_7DS_TGACv1_622008_AA2031040,TRIAE_CS42_U_TGACv1_640842_AA2076810,TRIAE_CS42_3DS_TGACv1_274412_AA0935710,TRIAE_CS42_7DS_TGACv1_622292_AA2037160,TRIAE_CS42_…	K04733,K04730,K10704,	http://www.kegg.jp/kegg-bin/show_pathway?scale=1.0&query=&map=ko04624&use=reference&multi_query=K04733+green%0D%0AK04730+green%0D%0AK10704+blue%0D%0A
ko00710	Carbon fixation in photosynthetic organisms	Metabolism	44(2.75%)	244(1.14%)	1.39623e-08	3.69366e-07	TRIAE_CS42_7BL_TGACv1_577218_AA1869310,TRIAE_CS42_7AL_TGACv1_560290_AA1802000,TRIAE_CS42_7DL_TGACv1_602640_AA1963570,TRIAE_CS42_2DL_TGACv1_158386_AA0517110,TRIAE_CS42_2DS_TGACv1_177171_AA0567540,TRIAE_CS42_4DL_TGACv1_344866_AA1150230,TRIAE_CS42_U_TGACv1_642847_AA2124040,TRIAE_CS42_7AL_TGACv1_557283_AA1779230,TRIAE_CS42_2AS_TGACv1_113196_AA0352880,TRIAE_CS42_4DS_TGACv1_361640_AA1171030,TRIAE_CS42_…	K01595,K05298,K01602,K00051,K00024,K01623,K03841,K01100,K00927,K00814,K01610,K00855,K14455,	http://www.kegg.jp/kegg-bin/show_pathway?scale=1.0&query=&map=ko00710&use=reference&multi_query=K01595+blue%0D%0AK05298+blue%0D%0AK01602+green%0D%0AK00051+blue%0D%0AK00024+red%0D%0AK01623+blue%0D%0AK03841+green%0D%0AK01100+blue%0D%0AK00927+red%0D%0AK00814+red%0D%0AK01610+red%0D%0AK00855+blue%0D%0AK14455+blue%0D%0A
